# Supplementary material for: Persistent, mobile, and toxic plastic additives in Canada: properties and prioritization
Source: Royal Society of Chemistry journal article supplement (doi:10.1039/d2em00097k), 2022-01-01
Supplement: d2em00097k1.pdf [file d2em00097k1.pdf]

## Supporting Information

### Persistent, Mobile, and Toxic Plastic Additives in Canada: Properties and Prioritization

Eric Fries<sup>1</sup>, Tanjot Grewal<sup>1,2</sup>, Roxana Sühling<sup>1\*</sup>

<sup>1</sup>Department of Chemistry and Biology, Ryerson University, 350 Victoria St, Toronto, ON M5B 2K3, Canada

<sup>2</sup>Department of Chemistry and Chemical Biology, McMaster University, 1280 Main Street West, Hamilton, ON L8S 3L8, Canada

#### Contents

|                                                                                                                                                                                                                                                                                                      |   |
|------------------------------------------------------------------------------------------------------------------------------------------------------------------------------------------------------------------------------------------------------------------------------------------------------|---|
| <b>Figure S1.</b> Log $K_{oc}/D_{oc}/K_{ow}/D_{ow}$ versus log vapour pressure (Pa) graph of 124 PMT plastic additives plotted according to their predicted percent emission via effluent in a WWTP simulation. ....                                                                                 | 2 |
| <b>Figure S2.</b> Log $K_{oc}/D_{oc}/K_{ow}/D_{ow}$ versus log $K_{aw}$ for the 124 PMT plastic additives, plotted according to their predicted percent emission via effluent, and whether both property values were experimental data (Exp.) or at least one value was predicted data (Pred.). .... | 2 |
| <b>Figure S3.</b> Bar chart of the use functions of the 124 PMT plastic additives. The orange bars indicate the percent of all PMTs and their uses by category and the blue bars indicate the percent of all the PMTs with a 80-100% emission via effluent for the given category. ....              | 3 |
| <b>Figure S4:</b> The distribution of air emission (as a percentage of total emission) of 124 PMT plastic additives, based on their use category. ....                                                                                                                                               | 3 |
| <b>Figure S5:</b> The partitioning into sludge of the 124 PMT plastic additives, based on their use category. ....                                                                                                                                                                                   | 4 |
| <b>Table S4:</b> Priority ranking of the 124 PMT plastic additives, ranked by total emission via effluent (with biodegradation). Substances with > 80% modeled emission through effluent are shaded orange, substances with > 50% < 80% modeled emission through effluent are shaded yellow. ....    | 4 |
| <b>Table S7:</b> Comparison of modeled removal from a typical WWTP in this study to observed removal in the literature. ....                                                                                                                                                                         | 8 |
| <b>References</b> .....                                                                                                                                                                                                                                                                              | 8 |

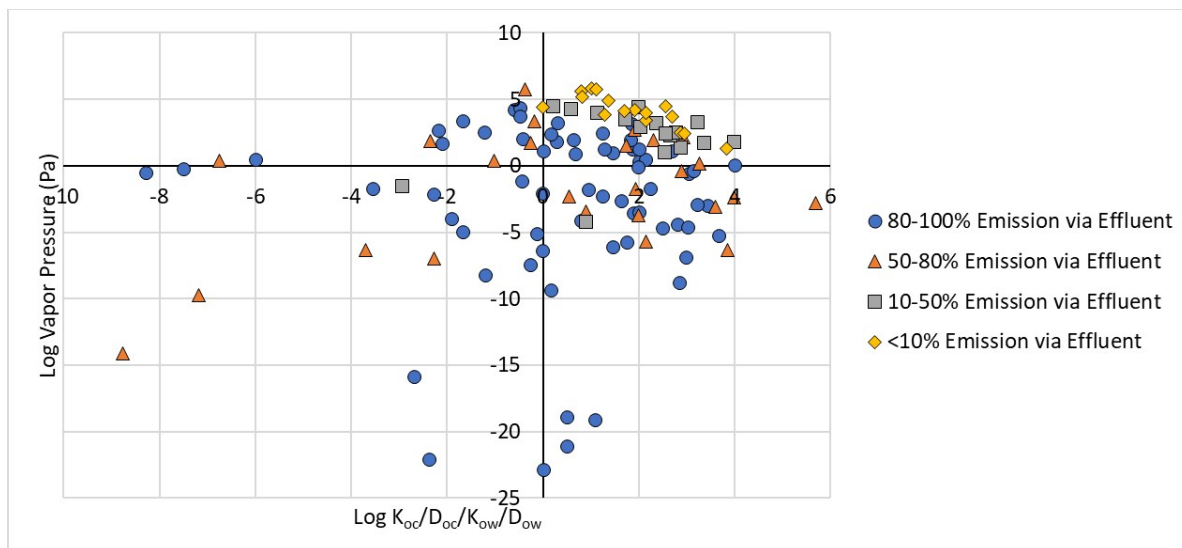

**Figure S1.** Log  $K_{oc}/D_{oc}/K_{ow}/D_{ow}$  versus log vapour pressure (Pa) graph of 124 PMT plastic additives plotted according to their predicted percent emission via effluent in a WWTP simulation.

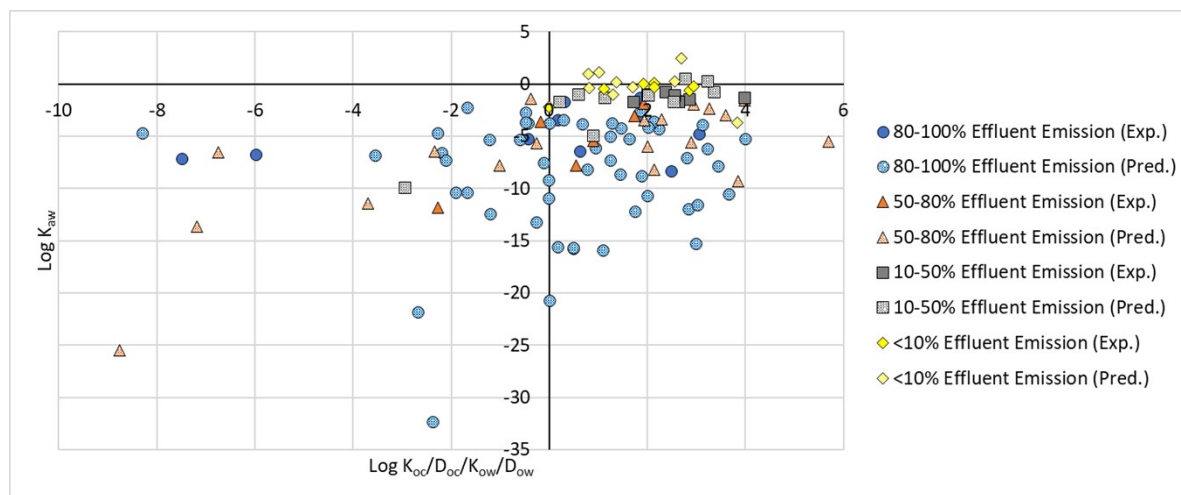

**Figure S2.** Log  $K_{oc}/D_{oc}/K_{ow}/D_{ow}$  versus log  $K_{aw}$  for the 124 PMT plastic additives, plotted according to their predicted percent emission via effluent, and whether both property values were experimental data (Exp.) or at least one value was predicted data (Pred.).

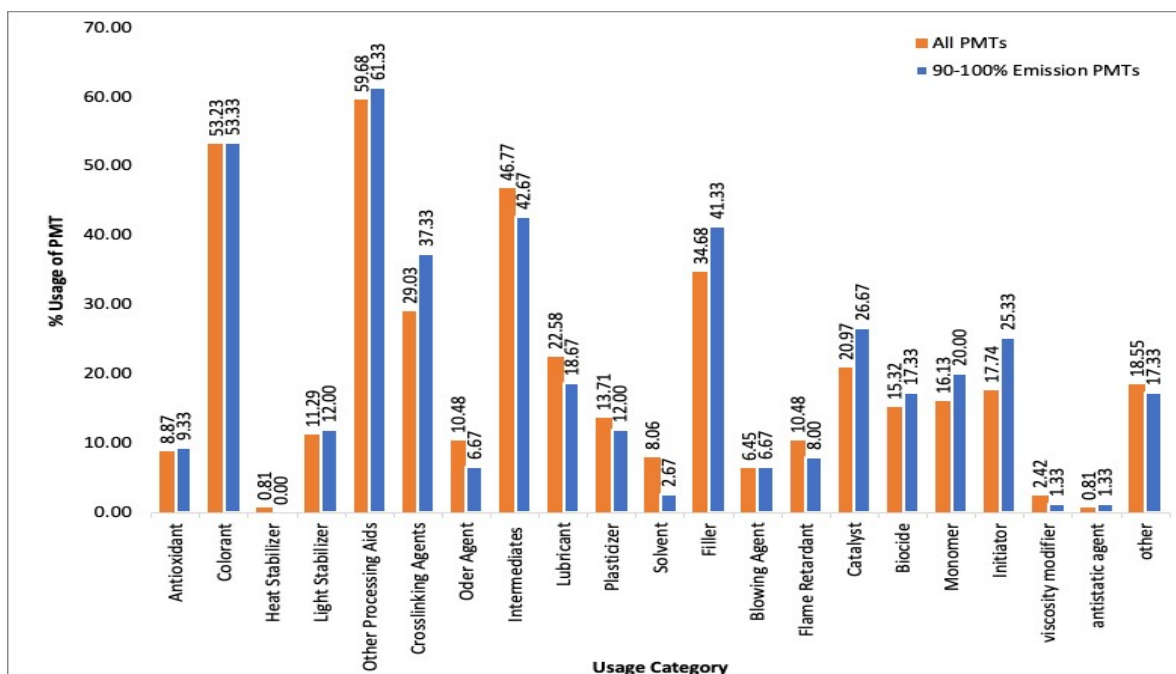

**Figure S3.** Bar chart of the use functions of the 124 PMT plastic additives. The orange bars indicate the percent of all PMTs and their uses by category and the blue bars indicate the percent of all the PMTs with a 80-100% emission via effluent for the given category.

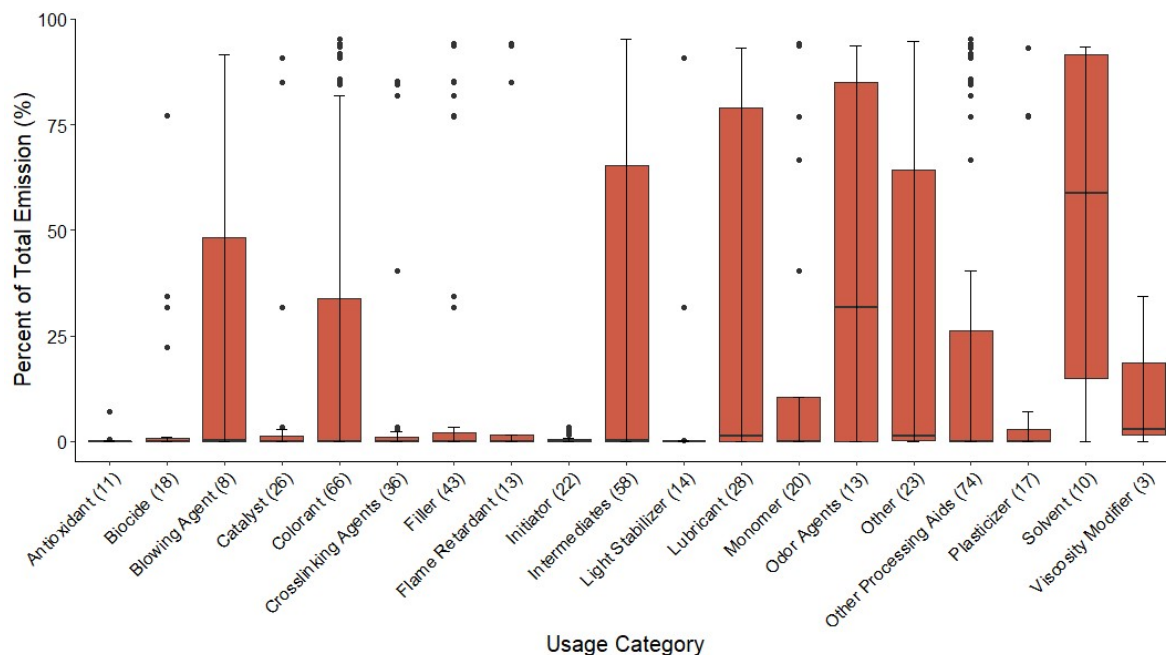

**Figure S4:** The distribution of air emission (as a percentage of total emission) of 124 PMT plastic additives, based on their use category.

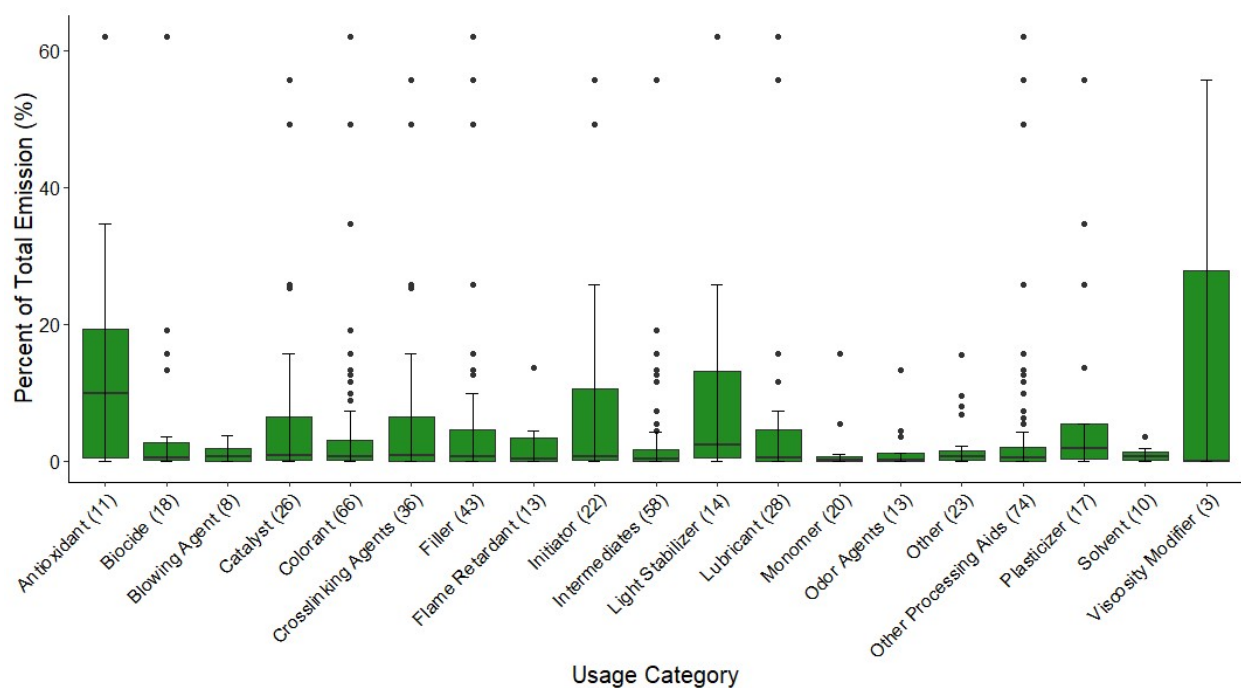

**Figure S5:** The partitioning into sludge of the 124 PMT plastic additives, based on their use category.

**Table S4:** Priority ranking of the 124 PMT plastic additives, ranked by total emission via effluent (with biodegradation). Substances with > 80% modeled emission through effluent are shaded orange, substances with > 50% < 80% modeled emission through effluent are shaded yellow.

| Priority Rank | Name                                                                                                                      | CAS #       | Total emission via effluent (%) |
|---------------|---------------------------------------------------------------------------------------------------------------------------|-------------|---------------------------------|
| 1             | 2-(1-methylpropyl)-4,6-dinitrophenol                                                                                      | 88-85-7     | 99.9                            |
| 2             | 2,2'-[(1,2-ethenediyl)bis[5-amino-benzenesulfonic acid]                                                                   | 81-11-8     | 99.8                            |
| 3             | 4-amino-benzenesulfonic acid                                                                                              | 121-57-3    | 99.6                            |
| 4             | 1,3,5,7-Tetraazatricyclo[3.3.1.1.3,7]decane                                                                               | 100-97-0    | 99.4                            |
| 5             | 2,2'-[(3,3'-dichloro[1,1'-biphenyl]-4,4'-diyl)bis(2,1-diazenediyl)]bis[N-(4-chloro-2,5-dimethoxyphenyl)-3-oxo-butanamide] | 5567-15-7   | 99.4                            |
| 6             | 2,2'-[(2,2',5,5'-tetrachloro[1,1'-biphenyl]-4,4'-diyl)bis(2,1-diazenediyl)]bis[N-(2,4-dimethylphenyl)-3-oxo-butanamide]   | 22094-93-5  | 99.4                            |
| 7             | 2,2'-[(3,3'-dichloro[1,1'-biphenyl]-4,4'-diyl)bis(2,1-diazenediyl)]bis[N-(2-methylphenyl)-3-oxo-butanamide]               | 5468-75-7   | 99.3                            |
| 8             | 2-methyl-4,6-bis[(octylthio)methyl]-phenol                                                                                | 110553-27-0 | 98.9                            |
| 9             | 1,1'-(methylenedi-4,1-phenylene)bis-1H-Pyrrole-2,5-dione                                                                  | 13676-54-5  | 98.8                            |
| 10            | N-butyl-benzenesulfonamide                                                                                                | 3622-84-2   | 98.8                            |
| 11            | 2,2'-[(3,3'-dichloro[1,1'-biphenyl]-4,4'-diyl)bis(2,1-                                                                    | 6358-37-8   | 98.1                            |

|    |                                                                           |            |      |
|----|---------------------------------------------------------------------------|------------|------|
|    | diazenediyl)]bis[N-(4-methylphenyl)-3-oxo-butanamide]                     |            |      |
| 12 | 2-amino-5-methyl-benzenesulfonic acid                                     | 88-44-8    | 97.1 |
| 13 | N-[4-(2-oxiranylmethoxy)phenyl]-N-(2-oxiranylmethyl)-2-oxiranemethanamine | 5026-74-4  | 97.1 |
| 14 | 6-chloro-N2-ethyl-N4-(1-methylethyl)-1,3,5-triazine-2,4-diamine           | 1912-24-9  | 97.0 |
| 15 | 1,1'-oxybis[2-methoxy-ethane]                                             | 111-96-6   | 96.4 |
| 16 | 2,4-dichlorophenol                                                        | 120-83-2   | 96.2 |
| 17 | 1,1,1-trifluoro-methanesulfonic acid                                      | 1493-13-6  | 96.1 |
| 18 | 2-Chloro-, 1,1',1"-phosphate ethanol                                      | 115-96-8   | 95.8 |
| 19 | 1,8-Naphthalenediamine                                                    | 479-27-6   | 95.6 |
| 20 | 2-methyl-1-[4-(methylthio)phenyl]-2-(4-morpholinyl)-1-propanone           | 71868-10-5 | 95.5 |
| 21 | 5,5-diphenyl-2,4-imidazolidinedione                                       | 57-41-0    | 95.4 |
| 22 | 1-chloro-4-nitrobenzene                                                   | 100-00-5   | 95.1 |
| 23 | 1,4-Diazabicyclo[2.2.2]octane                                             | 280-57-9   | 95.0 |
| 24 | 1,1'-cyclohexylidenebis[2-(1,1-dimethylethyl)peroxide]                    | 3006-86-8  | 94.4 |
| 25 | 1-methyl-4-nitro-benzene                                                  | 99-99-0    | 93.9 |
| 26 | 2,4-diisocyanato-1-methyl-benzene                                         | 584-84-9   | 93.5 |
| 27 | 4,4'-sulfonylbis-benzenamine                                              | 80-08-0    | 93.3 |
| 28 | 1,3,5-Triazine-2,4,6(1H,3H,5H)-trione                                     | 108-80-5   | 93.3 |
| 29 | 4,4'-methylenebis[2-methyl-cyclohexanamine]                               | 6864-37-5  | 93.3 |
| 30 | 4,4'-methylenebis(cyclohexylamine)                                        | 1761-71-3  | 93.2 |
| 31 | 4,4'-methylenebis-benzenamine                                             | 101-77-9   | 93.2 |
| 32 | 1-methyl-2-nitro-benzene                                                  | 88-72-2    | 93.1 |
| 33 | 4,4'-oxybis-, 1,1'-dihydrazide benzenesulfonic acid                       | 80-51-3    | 92.6 |
| 34 | 2,2'-(1,2-diazenediyl)bis[2-methyl-propanenitrile]                        | 78-67-1    | 92.3 |
| 35 | 1,2-dibromoethane                                                         | 106-93-4   | 91.9 |
| 36 | 4,4'-sulfonylbis-phenol                                                   | 80-09-1    | 91.7 |
| 37 | N,N'-bis(2-methylphenyl)-guanidine                                        | 97-39-2    | 91.6 |
| 38 | N-methyl-benzenamine                                                      | 100-61-8   | 91.4 |
| 39 | Benzothiazole                                                             | 95-16-9    | 91.1 |
| 40 | 4-ethenyl-pyridine                                                        | 100-43-6   | 90.7 |
| 41 | 2-(1,3-dihydro-3-oxo-2H-indol-2-ylidene)-1,2-dihydro-3H-indol-3-one       | 482-89-3   | 89.8 |
| 42 | 2,2,2-trifluoro-acetic acid                                               | 76-05-1    | 89.8 |
| 43 | 2-butoxy-, 1,1',1"-phosphate ethanol                                      | 78-51-3    | 89.5 |
| 44 | Isoquinoline                                                              | 119-65-3   | 89.4 |
| 45 | (17 $\alpha$ )-hydroxy-19-norpregn-4-en-20-yn-3-one                       | 68-22-4    | 88.6 |
| 46 | 2,3,4,6,7,8,9,10-octahydro-pyrimido[1,2-a]azepine                         | 6674-22-2  | 88.5 |
| 47 | Dibutyl ester phosphoric acid                                             | 107-66-4   | 87.4 |
| 48 | N-(4-hydroxyphenyl)-acetamide                                             | 103-90-2   | 87.4 |
| 49 | 2,4,6-tribromophenol                                                      | 118-79-6   | 87.4 |

|    |                                                                           |                     |      |
|----|---------------------------------------------------------------------------|---------------------|------|
| 50 | N,N-dimethyl-2-propenamide                                                | 284-95-7, 2680-03-7 | 87.2 |
| 51 | 1,1'-sulfinylbis-methane                                                  | CAS_RN:67-68-5      | 87.0 |
| 52 | 3-chloro-benzenamine                                                      | 108-42-9            | 86.9 |
| 53 | N1-[2-(dimethylamino)ethyl]-N1,N2,N2-trimethyl-1,2-ethanediamine          | 3030-47-5           | 86.6 |
| 54 | 1,4-dioxane                                                               | 123-91-1            | 86.5 |
| 55 | 1,3-Dichloro-, 2,2',2"-phosphate 2-propanol                               | 13674-87-8          | 86.1 |
| 56 | 1,2-benzisothiazol-3(2H)-one 1,1-dioxide                                  | 81-07-2             | 84.9 |
| 57 | 2-nitropropane                                                            | 79-46-9             | 84.4 |
| 58 | (2-hydroxy-4-methoxyphenyl)phenyl-methanone                               | 131-57-7            | 84.0 |
| 59 | 1,1,1,3,3,3-hexafluoro-2-Propanol                                         | 920-66-1            | 82.7 |
| 60 | 2-(2H-benzotriazol-2-yl)-4-methyl-phenol                                  | 2440-22-4           | 82.6 |
| 61 | 5,5'-(1H-isoindole-1,3(2H)-diylidene)bis-2,4,6(1H,3H,5H)-pyrimidinetrione | 36888-99-0          | 82.2 |
| 62 | 2,6-dimethyl-benzenamine                                                  | 87-62-7             | 81.8 |
| 63 | 2,4,7,9-tetramethyl-5-decyne-4,7-diol                                     | 126-86-3            | 80.9 |
| 64 | Diphenyl-methanone                                                        | 119-61-9            | 80.8 |
| 65 | 1-methyl-1-phenylethylhydroperoxide                                       | 80-15-9             | 78.9 |
| 66 | 2-methyl-2-[(1-oxo-2-propen-1-yl)amino]-1-propanesulfonic acid            | 15214-89-8          | 77.6 |
| 67 | 4-aminophenol                                                             | CAS_RN:123-30-8     | 77.6 |
| 68 | 1,3,5-Triazine-2,4,6-triamine                                             | CAS_RN:108-78-1     | 77.5 |
| 69 | Nitrobenzene                                                              | CAS_RN:98-95-3      | 76.8 |
| 70 | 2,2'-oxybis[N,N-dimethyl-ethanamine]                                      | CAS_RN:3033-62-3    | 74.7 |
| 71 | N-cyanoguanidine                                                          | CAS_RN:461-58-5     | 73.3 |
| 72 | N,N'-diphenyl-guanidine                                                   | 102-06-7            | 72.7 |
| 73 | 5-amino-1,3,3-trimethyl-cyclohexanemethanamine                            | 2855-13-2           | 72.3 |
| 74 | N-ethyl-N-hydroxy-ethanamine                                              | 3710-84-7           | 69.9 |
| 75 | 5-chloro-2-(2,4-dichlorophenoxy)-phenol                                   | 3380-34-5           | 69.8 |
| 76 | N,N'-diphenyl-thiourea                                                    | 102-08-9            | 69.8 |
| 77 | 2,2'-(1,2-diazenediyl)bis[2-methyl-butanenitrile]                         | 13472-08-7          | 69.3 |
| 78 | N'-(3,4-dichlorophenyl)-N,N-dimethyl-urea                                 | 330-54-1            | 68.7 |
| 79 | 1-Chloro-, 2,2',2"-phosphate 2-propanol                                   | 13674-84-5          | 67.5 |
| 80 | Triethyl ester phosphoric acid                                            | 78-40-0             | 66.6 |
| 81 | Hexahydro-1,3-isobenzofurandione                                          | 85-42-7             | 66.5 |
| 82 | N,N,N',N'-tetramethyl-thiodicarbonyl diamide ((H2N)C(S))2S)               | 97-74-5             | 66.5 |
| 83 | N,N-bis[2-[bis(carboxymethyl)amino]ethyl]-glycine                         | 67-43-6             | 62.5 |
| 84 | 1,1'-oxybis-methane                                                       | 115-10-6            | 60.8 |
| 85 | Anthracene                                                                | 120-12-7            | 57.4 |
| 86 | 1,2-dihydro-acenaphthylene                                                | 83-32-9             | 55.6 |
| 87 | N,N'-1,2-ethanediylbis[N-(carboxymethyl)-glycine]                         | 60-00-4             | 52.5 |
| 88 | 1,1'-(phenylphosphinylidene)bis[1-(2,4,6-trimethylphenyl)-methanone]      | 162881-26-7         | 50.1 |

|     |                                                             |            |      |
|-----|-------------------------------------------------------------|------------|------|
| 89  | 1,2,3-trichloropropane                                      | 96-18-4    | 49.5 |
| 90  | 2-methyl-benzenesulfonamide                                 | 88-19-7    | 42.4 |
| 91  | 2-[[2-[2-(dimethylamino)ethoxy]ethyl]methylamino]-ethanol   | 83016-70-0 | 42.4 |
| 92  | 2-methoxy-2-methyl-propane                                  | 1634-04-4  | 41.5 |
| 93  | Bis(1-methyl-1-phenylethyl) peroxide                        | 80-43-3    | 40.2 |
| 94  | Naphthalene                                                 | 91-20-3    | 35.7 |
| 95  | 1H-Benzotriazole                                            | 95-14-7    | 35.5 |
| 96  | 1,1,2-trichloroethane                                       | 79-00-5    | 35.2 |
| 97  | 1,2-dichloroethane                                          | 107-06-2   | 28.5 |
| 98  | 1-bromo-3-chloropropane                                     | 109-70-6   | 24.8 |
| 99  | 1,2,4-trichlorobenzene                                      | 120-82-1   | 24.6 |
| 100 | 1,2,3-trichlorobenzene                                      | 87-61-6    | 21.5 |
| 101 | 1,2-dichlorobenzene                                         | 95-50-1    | 20.1 |
| 102 | 2,2'-oxybis-propane                                         | 108-20-3   | 17.2 |
| 103 | 1,2,3,4-tetrahydro-naphthalene                              | 119-64-2   | 16.6 |
| 104 | Chlorobenzene                                               | 108-90-7   | 14.8 |
| 105 | 3a,4,7,7a-tetrahydro-4,7-methano-1H-indene                  | 77-73-6    | 14.6 |
| 106 | 1,3-dichlorobenzene                                         | 541-73-1   | 11.1 |
| 107 | 4-ethenyl-cyclohexene                                       | 100-40-3   | 9.4  |
| 108 | Trichloromethane                                            | 67-66-3    | 8.7  |
| 109 | 1,3,5-trimethyl-benzene                                     | 108-67-8   | 7.8  |
| 110 | (1-methylethyl)-benzene                                     | 98-82-8    | 6.9  |
| 111 | 1,1,2,2-tetrachloroethene                                   | 127-18-4   | 6.3  |
| 112 | Tetrachloromethane                                          | 56-23-5    | 5.7  |
| 113 | (1E)-1,2-dichloroethene                                     | 156-60-5   | 5.0  |
| 114 | 1,1,1,3,3,3-hexamethyl-disiloxane                           | 107-46-0   | 4.3  |
| 115 | 1,1,1-trichloroethane                                       | 71-55-6    | 4.0  |
| 116 | 2,4,6,8-tetraethenyl-2,4,6,8-tetramethyl-cyclotetrasiloxane | 2554-06-5  | 3.9  |
| 117 | Dichlorodifluoromethane                                     | 75-71-8    | 3.4  |
| 118 | 1,2-dichloropropane                                         | 78-87-5    | 3.3  |
| 119 | Chlorotrimethylsilane                                       | 75-77-4    | 0.6  |
| 120 | Chloroethane                                                | 75-00-3    | 0.3  |
| 121 | 1,1-dichloroethylene                                        | 75-35-4    | 0.1  |
| 122 | 1,1,2-trichloroethene                                       | 79-01-6    | 0.0  |
| 123 | Chloroethene                                                | 75-01-4    | 0.0  |
| 124 | Chloromethane                                               | 74-87-3    | 0.0  |

**Table S7:** Comparison of modeled removal from a typical WWTP in this study to observed removal in the literature.

| CAS        | Name                                                            | Removal (%) | Removal (Literature, %)                                                      |
|------------|-----------------------------------------------------------------|-------------|------------------------------------------------------------------------------|
| 95-14-7    | 1H-Benzotriazole                                                | 64.49       | 26 <sup>1,3</sup> , ~30 <sup>4</sup> , 56-74 <sup>5</sup>                    |
| 115-96-8   | 2-Chloro-, 1,1',1''-phosphate ethanol                           | 4.23        | 1 <sup>1,6</sup> , ~20 <sup>4</sup>                                          |
| 13674-84-5 | 1-Chloro-, 2,2',2''-phosphate 2-propanol                        | 32.54       | 1 <sup>1,6</sup> , ~0 <sup>4</sup>                                           |
| 13674-87-8 | 1,3-Dichloro-, 2,2',2''-phosphate 2-propanol                    | 13.87       | 1 <sup>1,6</sup>                                                             |
| 78-51-3    | 2-butoxy-, 1,1',1''-phosphate ethanol                           | 10.53       | 88 <sup>1,6</sup>                                                            |
| 3380-34-5  | 5-chloro-2-(2,4-dichlorophenoxy)-phenol                         | 30.23       | 90 <sup>1,7-8</sup> , ~70 <sup>9</sup>                                       |
| 95-16-9    | Benzothiazole                                                   | 8.89        | 80 <sup>1,3,10</sup> , ~80 <sup>4</sup>                                      |
| 131-57-7   | (2-hydroxy-4-methoxyphenyl)phenyl-methanone                     | 15.97       | 90 <sup>1,11-12</sup> , ~70-100 <sup>9</sup>                                 |
| 126-86-3   | 2,4,7,9-tetramethyl-5-decyne-4,7-diol                           | 19.13       | 50 <sup>1,13</sup>                                                           |
| 103-90-2   | N-(4-hydroxyphenyl)-acetamide                                   | 12.59       | 100 <sup>1,3,14-15</sup> , ~92-100 <sup>9</sup> ,<br>73.4-99.3 <sup>16</sup> |
| 1981-07-02 | 1,2-benzisothiazol-3(2H)-one 1,1-dioxide                        | 15.08       | 99 <sup>1,17-18</sup>                                                        |
| 60-00-4    | N,N'-1,2-ethanediylbis[N-(carboxymethyl)-glycine]               | 47.49       | 5 <sup>1,10,19-21</sup> , ~0 <sup>4</sup>                                    |
| 1912-24-9  | 6-chloro-N2-ethyl-N4-(1-methylethyl)-1,3,5-triazine-2,4-diamine | 2.97        | 23 <sup>1,3,22</sup> , ~0 <sup>5</sup>                                       |
| 330-54-1   | N'-(3,4-dichlorophenyl)-N,N-dimethyl-urea                       | 31.34       | 33 <sup>1-3,22</sup> , ~0 <sup>5</sup>                                       |
| 83-32-9    | 1,2-dihydro-acenaphthylene                                      | 44.4        | 85 <sup>1,23</sup>                                                           |
| 120-12-7   | Anthracene                                                      | 42.64       | 90 <sup>1,23</sup>                                                           |
| 91-20-3    | Naphthalene                                                     | 64.34       | 60 <sup>1,23</sup>                                                           |
| 108-78-1   | 1,3,5-Triazine-2,4,6-triamine                                   | 22.54       | 53 <sup>24</sup>                                                             |

## References

1. J. Margot, L. Rossi, D. A. Barry and C. Holliger, A review of the fate of micropollutants in wastewater treatment plants, *Wiley Interdiscip. Rev. Water*, 2015, **2**, 457–487.
2. R. L. Oulton, T. Kohn and D. M. Cwiertny, Pharmaceuticals and personal care products in effluent matrices: A survey of transformation and removal during wastewater treatment and implications for wastewater management, *J. Environ. Monit.*, 2010, **12**, 1956–1978.
3. A. A. Guedez and W. Püttmann, Occurrence and fate of TMDD in wastewater treatment plants in Germany, *Water Res.*, 2011, **45**, 5313–5322.
4. T. Reemtsma, S. Weiss, J. Mueller, M. Petrovic, S. González, D. Barcelo, F. Ventura and T. P. Knepper, Polar pollutants entry into the water cycle by municipal wastewater: A European perspective, *Environ. Sci. Technol.*, 2006, **40**, 5451–5458.
5. W. Qi, H. Singer, M. Berg, B. Müller, B. Pernet-Coudrier, H. Liu and J. Qu, Elimination of polar micropollutants and anthropogenic markers by wastewater treatment in Beijing, China, *Chemosphere*, 2015, **119**, 1054–1061.



6. K. D. North, Tracking Polybrominated Diphenyl Ether Releases in a Wastewater Treatment Plant Effluent, Palo Alto, California, *Environ. Sci. Technol.*, 2004, **38**, 4484–4488.
7. M. Gardner, S. Comber, M. D. Scrimshaw, E. Cartmell, J. Lester and B. Ellor, The significance of hazardous chemicals in wastewater treatment works effluents, *Sci. Total Environ.*, 2012, **437**, 363–372.
8. M. Pelaez, M. G. Antoniou, X. He, D. D. Dionysiou, A. A. De Cruz, K. Tsimeli, T. Triantis, T. Kaloudis, C. Williams, M. Aubel, A. Foss, U. Khan, K. E. O. Shea and J. Westrick, 2010, vol. 16, pp. 213–226.
9. B. Kasprzyk-Hordern, R. M. Dinsdale and A. J. Guwy, The removal of pharmaceuticals, personal care products, endocrine disruptors and illicit drugs during wastewater treatment and its impact on the quality of receiving waters, *Water Res.*, 2009, **43**, 363–380.
10. M. G. Kokotou and N. S. Thomaidis, Determination of eight artificial sweeteners in wastewater by hydrophilic interaction liquid chromatography-tandem mass spectrometry, *Anal. Methods*, 2013, **5**, 3825–3833.
11. L. Bijlsma, E. Emke, F. Hernández and P. De Voogt, Investigation of drugs of abuse and relevant metabolites in Dutch sewage water by liquid chromatography coupled to high resolution mass spectrometry, *Chemosphere*, 2012, **89**, 1399–1406.
12. J. J. Yang and C. D. Metcalfe, Fate of synthetic musks in a domestic wastewater treatment plant and in an agricultural field amended with biosolids, *Sci. Total Environ.*, 2006, **363**, 149–165.
13. J. E. Loyo-Rosales, C. P. Rice and A. Torrents, Fate of octyl- and nonylphenol ethoxylates and some carboxylated derivatives in three American wastewater treatment plants, *Environ. Sci. Technol.*, 2007, **41**, 6815–6821.
14. M. Clara, G. Windhofer, P. Weilgony, O. Gans, M. Denner, A. Chovanec and M. Zessner, Identification of relevant micropollutants in Austrian municipal wastewater and their behaviour during wastewater treatment, *Chemosphere*, 2012, **87**, 1265–1272.
15. R. Loos, R. Carvalho, D. C. António, S. Comero, G. Locoro, S. Tavazzi, B. Paracchini, M. Ghiani, T. Lettieri, L. Blaha, B. Jarosova, S. Voorspoels, K. Servaes, P. Haglund, J. Fick, R. H. Lindberg, D. Schwesig and B. M. Gawlik, EU-wide monitoring survey on emerging polar organic contaminants in wastewater treatment plant effluents, *Water Res.*, 2013, **47**, 6475–6487.
16. M. Papageorgiou, C. Kosma and D. Lambropoulou, Seasonal occurrence, removal, mass loading and environmental risk assessment of 55 pharmaceuticals and personal care products in a municipal wastewater treatment plant in Central Greece, *Sci. Total Environ.*, 2016, **543**, 547–569.
17. I. González-Mariño, J. B. Quintana, I. Rodríguez and R. Cela, Evaluation of the occurrence and biodegradation of parabens and halogenated by-products in wastewater by accurate-mass liquid chromatography-quadrupole-time-of-flight-mass spectrometry (LC-QTOF-MS), *Water Res.*, 2011, **45**, 6770–6780.
18. N. Lozano, C. P. Rice, M. Ramirez and A. Torrents, Fate of Triclocarban, Triclosan and Methyltriclosan during wastewater and biosolids treatment processes, *Water Res.*, 2013, **47**, 4519–4527.
19. G. G. Ying, B. Williams and R. Kookana, Environmental fate of alkylphenols and alkylphenol ethoxylates—a review, *Environ. Int.*, 2002, **28**, 215–226.

20. F. T. Lange, M. Scheurer and H. J. Brauch, Artificial sweeteners--a recently recognized class of emerging environmental contaminants: a review, *Anal. Bioanal. Chem.*, 2012, **403**, 2503–2518.
21. A. Bergé, M. Cladière, J. Gasperi, A. Coursimault, B. Tassin and R. Moilleron, Meta-analysis of environmental contamination by phthalates, *Environ. Sci. Pollut. Res. Int.*, 2013, **20**, 8057–8076.
22. J. Meyer and K. Bester, Organophosphate flame retardants and plasticisers in wastewater treatment plants, *J. Environ. Monit.*, 2004, **6**, 599–605.
23. M. Blanchard, M. J. Teil, D. Ollivon, L. Legenti and M. Chevreuil, Polycyclic aromatic hydrocarbons and polychlorobiphenyls in wastewaters and sewage sludges from the Paris area (France), *Environ. Res.*, 2004, **95**, 184–197.
24. H. Zhu and K. Kannan, Occurrence and distribution of melamine and its derivatives in surface water, drinking water, precipitation, wastewater, and swimming pool water, *Environ. Pollut.*, 2020, **258**, 113743.
