# Supplementary material for: Persistent, mobile, and toxic plastic additives in Canada: properties and prioritization
Source: Royal Society of Chemistry journal article supplement (doi:10.1039/d2em00097k), 2022-01-01
Supplement: d2em00097k2.xlsx [file d2em00097k2.xlsx]

## Sheet: Table of Contents
Persistent, Mobile, and Toxic Plastic Additives in Canada: Properties and Prioritization
Eric Fries1, Tanjot Grewal1,2, Roxana Sühring1*
1Department of Chemistry and Biology, Ryerson University, 350 Victoria St, Toronto, ON M5B 2K3, Canada
2Department of Chemistry and Chemical Biology, McMaster University, 1280 Main Street West, Hamilton, ON L8S 3L8, Canada
Table of Contents
Table S1	list of PMT compounds aregistered for use in Canada
Table S2	list of PMT plastic additives registered for use in Canada with available physical chemical property data
Table S3	Modelled fate of PMT substances using the predicted environmental half-lives to estimate persistence
Table S4	Ranked list of PMT plastic additives
Table S5	Functions of PMT plastic additves
Table S6	Spectral database of PMT plastic additives
Table S7	Comparison of modeled removal from a typical WWTP in this study to observed removal in the literature
Table S8	Sensitivity analysis

## Sheet: Table S1
Table S1: List of PMT compounds aregistered for use in Canada
CAS	Name	Substance type
22042-96-2	[[(phosphonomethyl)imino]bis[(ethylenenitrilo)bis(methylene)]]tetrakisphosphonic acid, sodium salt	organic salt/mixture
34690-00-1	[[(phosphonomethyl)imino]bis[hexamethylenenitrilobis(methylene)]]tetrakisphosphonic acid	organic
1506-02-1	1-(5,6,7,8-tetrahydro-3,5,5,6,8,8-hexamethyl-2-naphthyl)ethan-1-one	organic
21145-77-7	1-(5,6,7,8-tetrahydro-3,5,5,6,8,8-hexamethyl-2-naphthyl)ethan-1-one	organic
13676-54-5	1,1'-(methylenedi-p-phenylene)bismaleimide	organic
920-66-1	1,1,1,3,3,3-hexafluoropropan-2-ol	organic
107-46-0	1,1,1,3,3,3-hexamethyl-disiloxane	organosilicon
71-55-6	1,1,1-trichloroethane	organic
79-00-5	1,1,2-trichloroethane	organic
79-01-6	1,1,2-trichloroethene	organic
75-35-4	1,1-dichloroethylene	organic
111-96-6	1,1'-oxybis[2-methoxy-ethane]	organic
115-10-6	1,1'-oxybis-methane	organic
119-64-2	1,2,3,4-tetrahydronaphthalene	organic
87-61-6	1,2,3-trichlorobenzene	organic
96-18-4	1,2,3-trichloropropane	organic
288-88-0	1,2,4-triazole	organic
120-82-1	1,2,4-trichlorobenzene	organic
2634-33-5	1,2-benzisothiazol-3(2H)-one 1,1-dioxide	organic
106-93-4	1,2-dibromoethane	organic
95-50-1	1,2-dichlorobenzene	organic
107-06-02	1,2-dichloroethane	organic
78-87-5	1,2-dichloropropane	organic
100-97-0	1,3,5,7-Tetraazatricyclo[3.3.1.13,7]decane	organic
108-80-5	1,3,5-Triazine-2,4,6(1H,3H,5H)-trione	organic
37640-57-6	1,3,5-triazine-2,4,6(1H,3H,5H)-trione, compound with 1,3,5-triazine-2,4,6-triamine (1:1)	organic salt/mixture
108-78-1	1,3,5-Triazine-2,4,6-triamine (Melamine)	organic
41583-09-9	1,3,5-triazine-2,4,6-triamine phosphate	organic salt/mixture
108-67-8	1,3,5-trimethyl-benzene (Mesitylene)	organic
541-73-1	1,3-dichlorobenzene	organic
85-98-3	1,3-diethyldiphenylurea	organic
53988-10-6	1,3-dihydro-4(or 5)-methyl-2H-benzimidazole-2-thione	organic
97-39-2	1,3-di-o-tolylguanidine	organic
115-27-5	1,4,5,6,7,7-hexachloro-8,9,10-trinorborn-5-ene-2,3-dicarboxylic anhydride	organic
284-95-7, 2680-03-7	1,4-Diazabicyclo[2.2.2]octane
280-57-9	1,4-diazabicyclooctane	organic
123-91-1	1,4-dioxane	organic
6674-22-2	1,8-diazabicyclo[5.4.0]undec-7-ene	organic
479-27-6	1,8-naphthylenediamine	organic
3468-63-1	1-[(2,4-dinitrophenyl)azo]-2-naphthol	organic
109-70-6	1-bromo-3-chloropropane	organic
97-00-7	1-chloro-2,4-dinitrobenzene	organic
100-00-5	1-chloro-4-nitrobenzene	organic
80-15-9	1-methyl-1-phenylethylhydroperoxide	organic
109-01-03	1-methylpiperazine	organic
556-88-7	1-nitroguanidine	pseudorganic
482-89-3	2-(1,3-dihydro-3-oxo-2H-indol-2-ylidene)-1,2-dihydro-3H-indol-3-one	organic
2440-22-4	2-(2H-benzotriazol-2-yl)-p-cresol	organic
81-11-8	2,2'-(1,2-ethenediyl)bis[5-amino-benzenesulfonic acid]	organic
76-05-1	2,2,2-trifluoro-acetic acid	organic
22094-93-5	2,2'-[(2,2',5,5'-tetrachloro[1,1'-biphenyl]-4,4'-diyl)bis(azo)]bis[N-(2,4-dimethylphenyl)-3-oxobutyramide]	organic
5468-75-7	2,2'-[(3,3'-dichloro[1,1'-biphenyl]-4,4'-diyl)bis(azo)]bis[N-(2-methylphenyl)-3-oxobutyramide]	organic
5567-15-7	2,2'-[(3,3'-dichloro[1,1'-biphenyl]-4,4'-diyl)bis(azo)]bis[N-(4-chloro-2,5-dimethoxyphenyl)-3-oxobutyramide]	organic
6358-37-8	2,2'-[(3,3'-dichloro[1,1'-biphenyl]-4,4'-diyl)bis(azo)]bis[N-(4-methylphenyl)-3-oxobutyramide]	organic
13472-08-7	2,2'-azobis[2-methylbutyronitrile]	organic
78-67-1	2,2'-dimethyl-2,2'-azodipropiononitrile	organic
6864-37-5	2,2'-dimethyl-4,4'-methylenebis(cyclohexylamine)	organic
108-20-3	2,2'-oxybis-propane	organic
2554-06-5	2,4,6,8-tetraethenyl-2,4,6,8-tetramethyl-cyclotetrasiloxane	organosilicon
118-79-6	2,4,6-tribromophenol	organic
126-86-3	2,4,7,9-tetramethyldec-5-yne-4,7-diol	organic
120-83-2	2,4-dichlorophenol	organic
51-28-5	2,4-dinitrophenol	organic
87-62-7	2,6-xylidine	organic
83016-70-0	2-[(2-[2-(dimethylamino)ethoxy]ethyl)methylamino]ethanol	organic
15214-89-8	2-acrylamido-2-methylpropanesulphonic acid	organic
994-05-8	2-methoxy-2-methylbutane	organic
71868-10-5	2-methyl-1-(4-methylthiophenyl)-2-morpholinopropan-1-one	organic
110553-27-0	2-methyl-4,6-bis[(octylthio)methyl]-phenol	organic
622-40-2	2-morpholinoethanol	organic
88-75-5	2-nitrophenol	organic
79-46-9	2-nitropropane	organic
88-72-2	2-nitrotoluene	organic
37971-36-1	2-phosphonobutane-1,2,4-tricarboxylic acid	organic
117-96-4	3,5-diacetamido-2,4,6-triiodobenzoic acid	organic
77-73-6	3a,4,7,7a-tetrahydro-4,7-methanoindene	organic
2855-13-2	3-aminomethyl-3,5,5-trimethylcyclohexylamine	organic
108-42-9	3-chloro-benzenamine	organic
7365-45-9	4-(2-hydroxyethyl)piperazin-1-ylethanesulphonic acid	organic
4404-43-7	4,4'-bis[4-[bis(2-hydroxyethyl)amino]-6-anilino-1,3,5-triazin-2-yl]amino]stilbene-2,2'-disulphonic acid	organic
25068-38-6	4,4'-Isopropylidenediphenol, oligomeric reaction products with 1-chloro-2,3-epoxypropane	organic salt/mixture
1761-71-3	4,4'-methylenebis(cyclohexylamine)	organic
101-77-9	4,4'-methylenebis-benzenamine	organic
80-51-3	4,4'-oxydi(benzenesulphonohydrazide)	organic
80-09-1	4,4'-sulfonylbis-phenol	organic
104-23-4	4'-aminoazobenzene-4-sulphonic acid	organic
123-30-8	4-aminophenol	organic
88-44-8	4-aminotoluene-3-sulphonic acid	organic
4433-79-8	4'-chloro-2',5'-dimethoxyacetoacetanilide	organic
106-48-9	4-chlorophenol	organic
100-40-3	4-ethenyl-cyclohexene	organic
100-43-6	4-ethenyl-pyridine	organic
2226-96-2	4-hydroxy-2,2,6,6-tetramethylpiperidinoxyl	organic
584-84-9	4-methyl-m-phenylene diisocyanate	organic
97-52-9	4-nitro-o-anisidine	organic
100-02-7	4-nitrophenol	organic
99-99-0	4-nitrotoluene	organic
36888-99-0	5,5'-(1H-isoindole-1,3(2H)-diylidene)dibarbituric acid	organic
55589-62-3	6-methyl-1,2,3-oxathiazin-4(3H)-one 2,2-dioxide, potassium salt	organic salt/mixture
542-02-9	6-methyl-1,3,5-triazine-2,4-diyldiamine	organic
83-32-9	Acenaphthene	organic
68391-08-2	Alcohols, C8-14, ?-?-perfluoro	organic
1758-73-2	Aminoiminomethanesulphinic acid	pseudorganic
50-48-6	Amitriptyline	organic
120-12-7	Anthracene	organic
1912-24-9	Atrazine	organic
67801-01-8	Barium bis[5-chloro-4-ethyl-2-[(2-hydroxy-1-naphthyl)azo]benzenesulphonate]	organic salt/mixture
73612-34-7	Barium bis[6-chloro-4-[(2-hydroxy-1-naphthyl)azo]toluene-3-sulphonate]	organic salt/mixture
119-61-9	Benzophenone	organic
95-16-9	Benzothiazole	organic
95-14-7	Benzotriazole	organic
56-93-9	Benzyltrimethylammonium chloride	organic salt/mixture
80-43-3	Bis(1-methyl-1-phenylethyl) peroxide	organic
143-24-8	Bis(2-(2-methoxyethoxy)ethyl) ether	organic
3030-47-5	Bis(2-dimethylaminoethyl)(methyl)amine	organic
74-83-9	Bromomethane	pseudorganic
90268-24-9	Butanamide, 2,2'-[(3,3'-dichloro[1,1'-biphenyl]-4,4'-diyl)bis(azo)]bis[3-oxo-, N,N'-bis(4-chloro-2,5-dimethoxyphenyl and 2,4-xylyl) derivs.	organic
68610-86-6	Butanamide, 2,2'-[(3,3'-dichloro[1,1'-biphenyl]-4,4'-diyl)bis(azo)]bis[3-oxo-, N,N'-bis(o-anisyl and 2,4-xylyl) derivs.	organic
90268-23-8	Butanamide, 2,2'-[(3,3'-dichloro[1,1'-biphenyl]-4,4'-diyl)bis(azo)]bis[3-oxo-, N,N'-bis(p-anisyl and Ph) derivs.	organic
156-62-7	Calcium cyanamide	pseudorganic salt/mixture
56-23-5	Carbon tetrachloride	pseudorganic
55-56-1	Chlorhexidine	organic
108-90-7	Chlorobenzene	organic
75-00-3	Chloroethane	organic
75-01-4	Chloroethylene	organic
67-66-3	Chloroform	pseudorganic
74-87-3	Chloromethane	pseudorganic
75-77-4	Chlorotrimethylsilane	organosilicon
68987-63-3	Copper, [29H,31H-phthalocyaninato(2-)-N29,N30,N31,N32]-, chlorinated	organometallic substance/salt
98-82-8	Cumene	organic
420-04-2	Cyanamide	pseudorganic
461-58-5	Cyanoguanidine	organic
85-42-7	Cyclohexane-1,2-dicarboxylic anhydride	organic
3006-86-8	Cyclohexylidenebis[tert-butyl] peroxide	organic
80-08-0	Dapsone	organic
25376-45-8	Diaminotoluene	organic
26898-17-9	Dibenzyltoluene	organic
74-95-3	Dibromomethane	pseudorganic
107-66-4	Dibutyl ester phosphoric acid	organic salt/mixture
1185-81-5	Dibutylbis(dodecylthio)stannane	organometallic substance/salt
2781-10-4	Dibutyltin bis(2-ethylhexanoate)	organic
75-71-8	Dichlorodifluoromethane	pseudorganic
593-85-1	Diguanidinium carbonate	organic salt/mixture
25321-09-9	Diisopropylbenzene	organic
67-68-5	Dimethyl sulfoxide	organic
25321-14-6	Dinitrotoluene	organic
88-85-7	Dinoseb	organic
25956-17-6	Disodium 6-hydroxy-5-[(2-methoxy-4-sulphonato-m-tolyl)azo]naphthalene-2-sulphonate	organic salt/mixture
330-54-1	Diuron	organic
60-00-4	Edetic acid	organic
114-07-8	Erythromycin	organic
25550-51-0	Hexahydromethylphthalic anhydride	organic
15687-27-1	Ibuprofen	organic
119-65-3	Isoquinoline	organic
26471-62-5	m-tolylidene diisocyanate	organic salt/mixture
103-90-2	N-(4-hydroxyphenyl)-acetamide	organic
3033-62-3	N,N,N',N'-tetramethyl-2,2'-oxybis(ethylamine)	organic
3710-84-7	N,N-diethylhydroxylamine	organic
102-06-7	N,N'-diphenyl-guanidine	organic
102-08-9	N,N'-diphenyl-thiourea	organic
91-20-3	Naphthalene	organic
22204-53-1	Naproxen	organic
3622-84-2	N-butylbenzenesulphonamide	organic
67-43-6	N-carboxymethyliminobis(ethylenenitrilo)tetra(acetic acid)	organic
98-95-3	Nitrobenzene	organic
100-61-8	N-methyl-benzenamine	organic
68-22-4	Norethisterone	organic
2524-03-0	O,O-dimethyl phosphorochloridothioate	organic
95-54-5	o-phenylenediamine	organic
131-57-7	Oxybenzone	organic
5026-74-4	p-(2,3-epoxypropoxy)-N,N-bis(2,3-epoxypropyl)aniline	organic
140-01-2	Pentasodium (carboxylatomethyl)iminobis(ethylenenitrilo)tetraacetate	organic salt/mixture
76-74-4	Pentobarbital	organic
121-82-4	Perhydro-1,3,5-trinitro-1,3,5-triazine	organic
29420-49-3	PFBS - Potassium 1,1,2,2,3,3,4,4,4-nonafluorobutane-1-sulphonate	organic
60-80-0	Phenazone	organic
3380-34-5	Phenol, 5-chloro-2-(2,4-dichlorophenoxy)-	organic
68937-41-7	Phenol, isopropylated, phosphate (3:1)	organic
162881-26-7	Phenyl bis(2,4,6-trimethylbenzoyl)-phosphine oxide	organic
57-41-0	Phenytoin	organic
68512-65-2	Resin acids and Rosin acids, esters with ethylene glycol	organic
18559-94-9	Salbutamol	organic
23386-52-9	Sodium 1,4-dicyclohexyl sulphonatosuccinate	organic salt/mixture
5165-97-9	Sodium 2-methyl-2-[(1-oxoallyl)amino]propanesulphonate	organic salt/mixture
1561-92-8	Sodium 2-methylprop-2-ene-1-sulphonate	organic salt/mixture
52556-42-0	Sodium 3-(allyloxy)-2-hydroxypropanesulphonate	organic salt/mixture
3965-55-7	Sodium dimethyl 5-sulphonatoisophthalate	organic salt/mixture
5460-09-03	Sodium hydrogen 4-amino-5-hydroxynaphthalene-2,7-disulphonate	organic salt/mixture
532-02-5	Sodium naphthalene-2-sulphonate	organic salt/mixture
68-35-9	Sulfadiazine	organic
57-68-1	Sulfadimidine	organic
4065-45-6	Sulisobenzone	organic
121-57-3	Sulphanilic acid	organic
75-91-2	tert-butyl hydroperoxide	organic
1634-04-04	tert-butyl methyl ether	organic
127-18-4	Tetrachloroethylene	organic
56773-42-3	Tetraethylammonium heptadecafluorooctanesulphonate	organic salt/mixture
97-74-5	Tetramethylthiuram monosulphide	organic
88-19-7	Toluene-2-sulphonamide	organic
156-60-5	trans-dichloroethylene	organic
12108-13-3	Tricarbonyl(methylcyclopentadienyl)manganese	organosilicon
76-03-9	Trichloroacetic acid	organic
78-40-0	Triethyl phosphate	organic
1493-13-6	Trifluoromethanesulphonic acid	pseudorganic
78-51-3	Tris(2-butoxyethyl) phosphate	organic
13674-84-5	Tris(2-chloro-1-methylethyl) phosphate	organic
115-96-8	Tris(2-chloroethyl) phosphate	organic
13674-87-8	Tris[2-chloro-1-(chloromethyl)ethyl] phosphate	organic

## Sheet: Table S2
Table S2: List of PMT plastic additives registered for use in Canada with available physical chemical property data
CAS_Number	Name	MolecularMass (g/mol)	Log Kow	Kow / Dow	Koc / Doc	Water Solubility (mg/L)	Vapor Pressure (Pa)	Kaw	log Kaw	Biodeg Half-Life Experimental (days)	Biodeg Half-Life Predicted (days)	pKa	Substance_SMILES_Open_Babel	Type_of_substance	PMOC-score (Ground water)	PMOC-score (Surface water)	M-Score (via Arp et al.)
68-22-4	(17α)-hydroxy-19-norpregn-4-en-20-yn-3-one	298.426	3.44486	2785.2	-	7.04	0.001	1.1967e-08	-7.92202	-	78	N	C[C@]12CC[C@H]3[C@@H](CCC4=CC(=O)CC[C@H]34)[C@@H]1CC[C@@]2(O)C#C	organic	4	4	2
156-60-5	(1E)-1,2-dichloroethene	96.94	1.86	72.4436	1	0.000484	200 mmHg (median)	0.00673	-2.17198	-	28		Cl/C=C/Cl	organic	N/A	N/A	N/A
98-82-8	(1-methylethyl)-benzene	120.195	3.66	4570.88	883.08	61.3	250	0.60256	-0.22	15	15	N	CC(C)c1ccccc1	organic	1	Transient	3
131-57-7	(2-hydroxy-4-methoxyphenyl)phenyl-methanone	228.247	3.2266	1685.01	-	11939.6	0.0011	6.13024e-07	-6.21252	-	16	10.1722	COc1ccc(C(=O)c2ccccc2)c(O)c1	organic	3	3	5
13676-54-5	1,1'-(methylenedi-4,1-phenylene)bis-1H-Pyrrole-2,5-dione	358.353	2.51521	327.502	1000	25.2112	1.2e-07	5.03337e-16	-15.2981	-	83	N	c1cc(ccc1Cc1ccc(cc1)N1C(=O)C=CC1=O)N1C(=O)C=CC1=O	organic	Transient	Transient	3
162881-26-7	1,1'-(phenylphosphinylidene)bis[1-(2,4,6-trimethylphenyl)-methanone	418.473	5.77	588844	7079.46	3.68376	5e-07	5.15272e-10	-9.28796	-	107	N	Cc1cc(C)cc(C)c1C(=O)P(=O)(c1ccccc1)C(=O)c1c(C)cc(C)cc1C	organic	4	4	2
920-66-1	1,1,1,3,3,3-hexafluoro-2-Propanol	168.038	0.775489	5.96334	0.335714	153887	21200	0.0017378	-2.76	-	95	9.1762	OC(C(F)(F)F)C(F)(F)F	organic	5	Unstable MOC	5
107-46-0	1,1,1,3,3,3-hexamethyl-disiloxane	162.379	4.38355	24185.2	491.021	1.96587e+06	5500	260.336	2.41553	231	64.8	N	C[Si](C)(C)O[Si](C)(C)C	organosilicon	Transient	Transient	3
71-55-6	1,1,1-trichloroethane	133.4	2.49	309.03	50.4685	1500	13300	0.477427	-0.321093	-	65	N	CC(Cl)(Cl)Cl	organic	4.5	Unstable MOC	4
1493-13-6	1,1,1-trifluoro-methanesulfonic acid	150.07	-1.21387	0.0611129	-	888716	320	4.05675e-06	-5.39182	-	39	N	OS(=O)(=O)C(F)(F)F	pseudorganic	5	5	5
127-18-4	1,1,2,2-tetrachloroethene	165.82	3.22667	1685.26	141.254	150	2500	1.11557	0.0474966	-	21.1	N	ClC(=C(Cl)Cl)Cl	organic	4	Transient	3
79-00-5	1,1,2-trichloroethane	133.4	1.89	77.6247	52.4807	3500	3100	0.0346737	-1.46	-	47	N	ClCC(Cl)Cl	organic	4.5	Unstable MOC	4
79-01-6	1,1,2-trichloroethene	131.38	2.53	338.844	141.254	1100	9900	0.477283	-0.321224	-	6.18	N	ClC=C(Cl)Cl	organic	4	Transient	3
3006-86-8	1,1'-cyclohexylidenebis[2-(1,1-dimethylethyl)peroxide]	260.374	6.5	3.16228e+06	489.779	23.7857	12.3	0.0216887	-1.66377	-	107	N	CC(C)(C)OOC1(CCCCC1)OOC(C)(C)C	organic	Transient	Transient	3
75-35-4	1,1-dichloroethylene	96.94	2.13	134.896	23.4207	2420	80000	1.51356	0.18	-	28	N	C=C(Cl)Cl	organic	2	Unstable MOC	4
111-96-6	1,1'-oxybis[2-methoxy-ethane]	134.175	-0.42	0.380189	-	940000	99	5.70371e-06	-5.24384	-	38	N	COCCOCCOC	organic	5	5	5
115-10-6	1,1'-oxybis-methane	46.069	0.1	1.25893	0.415623	46000	593185	0.0398107	-1.4	-	16	N	COC	organic	3	Unstable MOC	5
67-68-5	1,1'-sulfinylbis-methane	78.13	-1.07416	0.0843028	4.36516	1000000	87.3	3.50343e-07	-6.45551	-	15	N	CS(=O)C	organic	3	3	5
119-64-2	1,2,3,4-tetrahydro-naphthalene	132.206	3.99	9772.37	-	47	58.3	0.063063	-1.20023	8	24	N	C1CCc2ccccc2C1	organic	3	Transient	2
87-61-6	1,2,3-trichlorobenzene	181.44	4.07667	11930.7	741.31	18	22.615	0.0744075	-1.12838	-	88	N	Clc1cccc(Cl)c1Cl	organic	4	Transient	3
96-18-4	1,2,3-trichloropropane	147.42	2.23848	173.173	83.1764	1750	491.877	0.0140269	-1.85304	-	4.6	N	ClCC(Cl)CCl	organic	4.5	Unstable MOC	4
120-82-1	1,2,4-trichlorobenzene	181.44	4.0175	10411.2	2295.73	49	57	0.151356	-0.82	-	88	N	Clc1ccc(Cl)cc1Cl	organic	4	Transient	2
81-07-2	1,2-benzisothiazol-3(2H)-one 1,1-dioxide	183.18	-0.112346	0.772065	-	4000	6.87628e-06	2.51511e-08	-7.59944	-	30	2.38722	O=C1c2ccccc2S(=O)(=O)N1	organic	4.5	4.5	4
106-93-4	1,2-dibromoethane	187.862	1.85	70.7946	2.06063	3910	1550	0.0194984	-1.71	-	20	N	BrCCBr	organic	3	Unstable MOC	5
95-50-1	1,2-dichlorobenzene	147	3.3925	2468.88	446.684	80	200.993	0.1	-1	191	5.01	N	Clc1ccccc1Cl	organic	4	Transient	3
107-06-2	1,2-dichloroethane	98.95	1.45	28.1838	13.6402	8800	10222.4	0.0463984	-1.3335	-	10	N	ClCCCl	organic	2	Unstable MOC	4
78-87-5	1,2-dichloropropane	112.98	2.25	177.828	19.8354	2700	6775	0.0933615	-1.02983	-	7.6	N	CC(CCl)Cl	organic	2	Unstable MOC	4
83-32-9	1,2-dihydro-acenaphthylene	154.212	4.04	10964.8	1820.79	3.9	1.52	0.00462381	-2.335	39	28	N	C1Cc2cccc3c2c1ccc3	organic	3	Transient	2
100-97-0	1,3,5,7-Tetraazatricyclo[3.3.1.13,7]decane	140.19	-7.48546	3.26994e-08	-	1.81421e+11	0.5332	6.70672e-08	-7.17349	-	249	9.30546	C1N2CN3CN1CN(C2)C3	organic	Unstable MOC	Unstable MOC	5
108-80-5	1,3,5-Triazine-2,4,6(1H,3H,5H)-trione	129.075	-1.19521	0.0637948	-	26000	5.87853e-09	3.57419e-13	-12.4468	-	20	N	O=c1[nH]c(=O)[nH]c(=O)[nH]1	organic	3	3	5
108-78-1	1,3,5-Triazine-2,4,6-triamine	126.123	-2.26139	0.00547781	-	38280	1.1e-07	1.60907e-12	-11.7934	-	4.51	5	Nc1nc(N)nc(N)n1	organic	5	5	5
108-67-8	1,3,5-trimethyl-benzene	120.195	3.61667	4136.82	741.31	48.2	320	0.218776	-0.66	3	19	N	Cc1cc(cc(c1)C)C	organic	1	Transient	3
13674-87-8	1,3-Dichloro-, 2,2',2''-phosphate 2-propanol	430.89	3.72653	5327.6	4677.35	7	5.6e-06	2.76305e-11	-10.5586	-	231	N	ClCC(CCl)OP(=O)(OC(CCl)CCl)OC(CCl)CCl	organic	Transient	Transient	2
541-73-1	1,3-dichlorobenzene	147	3.5175	3292.3	363.078	125	265	0.190546	-0.72	-	48	N	Clc1cccc(Cl)c1	organic	4	Transient	3
280-57-9	1,4-Diazabicyclo[2.2.2]octane	224.392	0.803877	6.36615	8.97429	66334.2	0.0159299	7.516e-07	-6.12401	-	42	polyprotic	C1CCCCCCC1N1CCCCNCC1	organic	5	5	5
123-91-1	1,4-dioxane	88.106	-0.27	0.537032	0.335954	1000000	4943.33	0.000194984	-3.71	-	9.36	N	C1COCCO1	organic	5	3	5
479-27-6	1,8-Naphthalenediamine	158.204	1.25742	18.0892	-	380	0.00468529	4.47913e-08	-7.34881	-	64	4.44	Nc1cccc2cccc(N)c12	organic	4	4	3
109-70-6	1-bromo-3-chloropropane	157.44	2.03059	107.298	-	2240	853.12	0.0806856	-1.0932	-	24	N	ClCCCBr	organic	Unstable MOC	Unstable MOC	4
13674-84-5	1-Chloro-, 2,2',2''-phosphate 2-propanol	327.56	2.94101	872.993	-	1600	133.001	0.0109905	-1.95898	-	3.68	N	CC(CCl)OP(=O)(OC(C)CCl)OC(C)CCl	organic	4.5	Unstable MOC	4
100-00-5	1-chloro-4-nitrobenzene	157.55	2.395	248.313	124.853	243	2.9127	0.00020181	-3.69506	-	64	N	c1cc(ccc1N(=O)=O)Cl	organic	Transient	Transient	3
95-14-7	1H-Benzotriazole	119.127	5.7	501187	-	19800	0.00165414	3.00614e-06	-5.52199	-	18	amphoprotic	c1ccc2[nH]nnc2c1	organic	3	3	5
80-15-9	1-methyl-1-phenylethylhydroperoxide	152.193	1.36891	23.3834	1376.92	3478.03	0.43491	0.00010643	-3.97294	-	24	10.1533	CC(C)c1ccccc1OO	organic	Transient	Transient	2
88-72-2	1-methyl-2-nitro-benzene	137.138	2.3	199.526	74.0491	650	18	0.00234423	-2.63	-	39	N	Cc1ccccc1N(=O)=O	organic	4.5	Unstable MOC	4
99-99-0	1-methyl-4-nitro-benzene	137.138	2.37	234.423	104.366	442	2.09281	0.000230237	-3.63783	-	39	N	Cc1ccc(cc1)N(=O)=O	organic	4	1	3
482-89-3	2-(1,3-dihydro-3-oxo-2H-indol-2-ylidene)-1,2-dihydro-3H-indol-3-one	262.268	1.56911	37.0778	707.946	9691.08	1.56635e-09	1.02441e-12	-11.9895	-	98	amphoprotic	O=C1c2ccccc2NC1=C1C(=O)c2ccccc2N1	organic	4	4	3
88-85-7	2-(1-methylpropyl)-4,6-dinitrophenol	240.215	-4.09	8.12827e-05	0.00537896	52	0.00665	1.86479e-05	-4.72937	314	4.57	4.65	CCC(C)c1cc(N(=O)=O)cc(N(=O)=O)c1O	organic	5	5	5
2440-22-4	2-(2H-benzotriazol-2-yl)-4-methyl-phenol	225.251	4.2	15848.9	1071.52	677.027	2.49271e-05	2.50275e-12	-11.6016	-	27	amphoprotic	Cc1cc(c(cc1)O)n1nc2ccccc2n1	organic	3	3	2
13472-08-7	2,2'-(1,2-diazenediyl)bis[2-methyl-butanenitrile]	192.266	2.89724	789.3	-	2203.15	0.381781	2.45761e-06	-5.60949	-	3.67	N	CCC(C)(C#N)N=NC(C)(CC)C#N	organic	4.5	4.5	4
78-67-1	2,2'-(1,2-diazenediyl)bis[2-methyl-propanenitrile]	164.212	1.1	12.5893	100	350	0.81	0.000153389	-3.81421	1093	7.49	N	CC(C)(C#N)N=NC(C)(C)C#N	organic	4.5	2	4
81-11-8	2,2'-(1,2-ethenediyl)bis[5-amino-benzenesulfonic acid]	370.39	-2.67586	0.0021093	-	27	1.38632e-16	1.37815e-22	-21.8607	-	251	amphoprotic	Nc1ccc(C=Cc2ccc(N)cc2S(=O)(=O)O)c(S(=O)(=O)O)c1	organic	Transient	Transient	2
76-05-1	2,2,2-trifluoro-acetic acid	114.023	-0.593168	0.255171	-	1000000	15800	4.5393e-06	-5.34301	-	20	0.52	OC(=O)C(F)(F)F	organic	5	5	5
22094-93-5	2,2'-[(2,2',5,5'-tetrachloro[1,1'-biphenyl]-4,4'-diyl)bis(2,1-diazenediyl)]bis[N-(2,4-dimethylphenyl)-3-oxo-butanamide]	754.49	0.5	3.16228	-	0.00083382	7.34081e-22	1.6939e-16	-15.7711	-	1619	amphoprotic	CC(=O)C(N=Nc1cc(Cl)c(cc1Cl)c1cc(Cl)c(cc1Cl)N=NC(C(=O)C)C(=O)Nc1ccc(C)cc1C)C(=O)Nc1ccc(C)cc1C	organic	Immobile POC	Immobile POC	1
5468-75-7	2,2'-[(3,3'-dichloro[1,1'-biphenyl]-4,4'-diyl)bis(2,1-diazenediyl)]bis[N-(2-methylphenyl)-3-oxo-butanamide]	657.55	0.5	3.16228	-	0.046293	1.19406e-19	1.97087e-16	-15.7053	-	773	amphoprotic	CC(=O)C(N=Nc1ccc(cc1Cl)c1ccc(N=NC(C(=O)C)C(=O)Nc2ccccc2C)c(Cl)c1)C(=O)Nc1ccccc1C	organic	Immobile POC	Immobile POC	1
5567-15-7	2,2'-[(3,3'-dichloro[1,1'-biphenyl]-4,4'-diyl)bis(2,1-diazenediyl)]bis[N-(4-chloro-2,5-dimethoxyphenyl)-3-oxo-butanamide]	818.49	0.02	1.04713	-	0.347392	1.24494e-23	1.94185e-21	-20.7118	-	716	amphoprotic	COc1cc(NC(=O)C(N=Nc2ccc(cc2Cl)c2ccc(N=NC(C(=O)C)C(=O)Nc3cc(OC)c(Cl)cc3OC)c(Cl)c2)C(=O)C)c(OC)cc1Cl	organic	4	4	2
6358-37-8	2,2'-[(3,3'-dichloro[1,1'-biphenyl]-4,4'-diyl)bis(2,1-diazenediyl)]bis[N-(4-methylphenyl)-3-oxo-butanamide]	657.55	1.1	12.5893	-	0.0420168	7.70777e-20	1.11266e-16	-15.9536	-	773	amphoprotic	CC(=O)C(N=Nc1ccc(cc1Cl)c1ccc(N=NC(C(=O)C)C(=O)Nc2ccc(C)cc2)c(Cl)c1)C(=O)Nc1ccc(C)cc1	organic	Immobile POC	Immobile POC	1
3033-62-3	2,2'-oxybis[N,N-dimethyl-ethanamine]	160.261	-2.33927	0.00457854	-	1.10217e+07	72	3.54096e-07	-6.45088	-	5.39	polyprotic	CN(C)CCOCCN(C)C	organic	5	5	5
108-20-3	2,2'-oxybis-propane	102.177	2.4	251.189	3.93713	3110	19900	0.10469	-0.980094	-	25	N	CC(C)OC(C)C	organic	5	Unstable MOC	5
6674-22-2	2,3,4,6,7,8,9,10-octahydro-pyrimido[1,2-a]azepine	152.241	-11.151	7.06331e-12	1.04386e-06	3.27336e+12	3	1.65485e-07	-6.78124	-	19	12.951	C1CCCCC2=NCCCN12	organic	3	3	5
2554-06-5	2,4,6,8-tetraethenyl-2,4,6,8-tetramethyl-cyclotetrasiloxane	344.66	6.38514	2.42739e+06	6816.48	3481.12	20.6739	0.000205159	-3.68791	-	215	N	C[Si]1(O[Si](O[Si](O[Si](O1)(C)C=C)(C)C=C)(C)C=C)C=C	organosilicon	Transient	Transient	2
118-79-6	2,4,6-tribromophenol	330.801	2.79972	630.544	0.370134	317111	0.063	0.000168241	-3.77407	370	13.8	6.19783	Oc1c(Br)cc(Br)cc1Br	organic	5	Unstable MOC	5
126-86-3	2,4,7,9-tetramethyl-5-decyne-4,7-diol	226.36	3.3343	2159.26	43.0527	1700	0.00226594	5.28869e-06	-5.27665	-	6.71	N	CC(C)CC(C)(C#CC(C)(CC(C)C)O)O	organic	4.5	4.5	4
120-83-2	2,4-dichlorophenol	163	0.779498	6.01864	1.02126	929032	12.9925	0.000175524	-3.75566	-	42	7.72178	Oc1ccc(Cl)cc1Cl	organic	5	3	5
584-84-9	2,4-diisocyanato-1-methyl-benzene	174.159	2.15006	141.273	-	52726.2	3.0659	0.00022726	-3.64348	-	26	N	Cc1ccc(cc1N=C=O)N=C=O	organic	Unstable MOC	Unstable MOC	5
87-62-7	2,6-dimethyl-benzenamine	121.183	1.29325	19.6449	19.2031	8240	16.7	0.000151356	-3.82	-	11.4	3.95	Cc1cccc(C)c1N	organic	4.5	2	4
83016-70-0	2-[[2-[2-(dimethylamino)ethoxy]ethyl]methylamino]-ethanol	190.287	-2.9362	0.00115824	-	7.65132e+10	0.0317032	1.17324e-10	-9.93061	-	4.14	9.09058	CN(C)CCOCCN(C)CCO	organic	5	5	5
88-44-8	2-amino-5-methyl-benzenesulfonic acid	187.21	-1.66365	0.0216944	-	6000	9.42431e-06	4.01176e-11	-10.3967	-	50	amphoprotic	Cc1ccc(N)c(S(=O)(=O)O)c1	organic	4.5	4.5	4
78-51-3	2-butoxy-, 1,1',1''-phosphate ethanol	398.477	3.44119	2761.76	316.228	663.5	1.96e-05	4.75112e-09	-8.3232	-	10	N	CCCCOCCOP(=O)(OCCOCCCC)OCCOCCCC	organic	4	4	3
115-96-8	2-Chloro-, 1,1',1''-phosphate ethanol	285.48	1.75474	56.8515	4.74679	7000	8.14625	0.000134543	-3.87114	-	35	N	ClCCOP(=O)(OCCCl)OCCCl	organic	Unstable MOC	Unstable MOC	5
1634-04-4	2-methoxy-2-methyl-propane	88.15	0.94	8.70964	1.63757	83000	32930	0.0196362	-1.70694	-	7.57	N	CC(C)(C)OC	organic	5	Unstable MOC	5
71868-10-5	2-methyl-1-[4-(methylthio)phenyl]-2-(4-morpholinyl)-1-propanone	279.4	2.12205	132.451	78.896	166.264	0.000255416	1.48596e-09	-8.82799	-	140	4.91848	CC(C)(C(=O)c1ccc(cc1)SC)N1CCOCC1	organic	Unstable MOC	Unstable MOC	4
15214-89-8	2-methyl-2-[(1-oxo-2-propen-1-yl)amino]-1-propanesulfonic acid	207.24	-3.7	0.000199526	-	1.75367e+06	4.4e-07	3.81138e-12	-11.4189	-	4.64	amphoprotic	CC(C)(CS(=O)(=O)O)N=C(O)C=C	organic	5	5	5
110553-27-0	2-methyl-4,6-bis[(octylthio)methyl]-phenol	438.77	9.86065	7.25513e+09	10220	0.027521	1	4.87794e-06	-5.31176	-	159	10.4221	CCCCCCCCCSCc1cc(CSCCCCCCCC)cc(C)c1O	organic	Transient	Transient	1
88-19-7	2-methyl-benzenesulfonamide	171.21	0.900639	7.95499	-	1620	6.6e-05	1.00076e-05	-4.99967	-	4.38	10.0235	Cc1ccccc1S(=O)(=O)N	organic	4.5	4.5	4
79-46-9	2-nitropropane	89.094	-1.26356	0.0545048	0.0216389	17000	2303	0.00501187	-2.3	-	16	8.06647	CC(C)N(=O)=O	organic	3	Unstable MOC	5
77-73-6	3a,4,7,7a-tetrahydro-4,7-methano-1H-indene	132.206	2.78	602.56	-	20	305.257	3.10354	0.491857	-	18	N	C1C=CC2C1C1CC2C=C1	organic	Transient	Transient	2
108-42-9	3-chloro-benzenamine	127.57	5.76578	583148	29.3386	5400	8.778	5.37032e-05	-4.27	-	8.75	3.52	Nc1cccc(Cl)c1	organic	4.5	4.5	4
1761-71-3	4,4'-methylenebis(cyclohexylamine)	210.365	0.151847	1.41856	0.000281645	2.17582e+10	0.018	1.29678e-07	-6.88713	-	17	10.6719	NC1CCC(CC2CCC(N)CC2)CC1	organic	3	3	5
6864-37-5	4,4'-methylenebis[2-methyl-cyclohexanamine]	238.419	-4.87138	1.34469e-05	0.006586	2.82898e+09	463.221	2.20677e-07	-6.65624	-	20	10.6714	CC1CC(CC2CCC(N)C(C)C2)CCC1N	organic	3	3	5
101-77-9	4,4'-methylenebis-benzenamine	198.269	0.544815	3.50602	6.18322	10221.3	7.595e-05	6.01777e-09	-8.22056	-	19.8	4.96	Nc1ccc(Cc2ccc(N)cc2)cc1	organic	5	Unstable MOC	5
80-51-3	4,4'-oxybis-, 1,1'-dihydrazide benzenesulfonic acid	358.39	0.174647	1.49502	-	62.5	4.44556e-10	2.57636e-16	-15.589	-	80	amphoprotic	NNS(=O)(=O)c1ccc(Oc2ccc(S(=O)(=O)NN)cc2)cc1	organic	4	4	3
80-08-0	4,4'-sulfonylbis-benzenamine	248.3	1.12167	13.2333	56.853	380	1.78623e-06	6.37504e-13	-12.1955	-	18	2.08474	c1cc(ccc1N)S(=O)(=O)c1ccc(cc1)N	organic	4.5	4.5	4
80-09-1	4,4'-sulfonylbis-phenol	250.27	-0.804321	0.15692	0.556774	379245	3.20068e-08	5.68686e-14	-13.2451	-	15.4	8	Oc1ccc(S(=O)(=O)c2ccc(O)cc2)cc1	organic	5	5	5
121-57-3	4-amino-benzenesulfonic acid	173.19	-1.90443	0.0124616	-	10800	0.0001	3.63553e-11	-10.4394	-	44	amphoprotic	Nc1ccc(S(=O)(=O)O)cc1	organic	5	5	5
123-30-8	4-aminophenol	109.128	-0.09	0.812831	3.54813	16000	0.00532	1.46812e-08	-7.83324	-	5.89	amphoprotic	Nc1ccc(O)cc1	organic	3	3	5
100-40-3	4-ethenyl-cyclohexene	108.184	3.23425	1714.93	-	50	2046.5	1.83244	0.26303	-	16	N	C=CC1CCC=CC1	organic	Transient	Transient	2
100-43-6	4-ethenyl-pyridine	105.14	0.174766	1.49543	-	29100	226.61	0.000330429	-3.48092	-	22	5.15592	C=Cc1ccncc1	organic	3	Unstable MOC	5
36888-99-0	5,5'-(1H-isoindole-1,3(2H)-diylidene)bis-2,4,6(1H,3H,5H)-pyrimidinetrione	367.277	-2.37337	0.00423283	-	165989	7.53145e-23	4.66199e-33	-32.3314	-	6.62	amphoprotic	O=C1C(=c2c3ccccc3c(=C3C(=O)NC(=O)NC3=O)[nH]2)C(=O)NC(=O)N1	organic	5	5	5
57-41-0	5,5-diphenyl-2,4-imidazolidinedione	252.273	2.26	181.97	1	4.2e-05	0.00000000280 mmHg	6.28e-10	-9.20204	-	43		O=C1NC(=O)C(N1)(c1ccccc1)c1ccccc1	organic	N/A	N/A	N/A
2855-13-2	5-amino-1,3,3-trimethyl-cyclohexanemethanamine	170.3	-6.74662	1.79215e-07	-	2.6214e+11	2.58	2.97463e-07	-6.52657	-	4.5	10.5496	CC1(C)CC(N)CC(C)(CN)C1	organic	5	5	5
3380-34-5	5-chloro-2-(2,4-dichlorophenoxy)-phenol	289.54	2.93405	859.105	8.01763	881.323	0.000393	3.8274e-06	-5.4171	-	4.51	8.14	Oc1cc(Cl)ccc1Oc1ccc(Cl)cc1Cl	organic	5	Unstable MOC	5
1912-24-9	6-chloro-N2-ethyl-N4-(1-methylethyl)-1,3,5-triazine-2,4-diamine	215.69	2.59	389.045	28.6959	31.93	8e-07	2.18116e-09	-8.66131	-	153	N	CCNc1nc(nc(n1)Cl)NC(C)C	organic	4.5	4.5	4
120-12-7	Anthracene	178.234	4.4725	29682.5	4009.77	0.0434	0.0008	0.00108393	-2.965	123	123	N	c1ccc2cc3ccccc3cc2c1	organic	4	Transient	2
95-16-9	Benzothiazole	135.18	2.02	104.713	-	4300	18	6.32413e-05	-4.199	-	8.45	-	c1ccc2scnc2c1	organic	2	2	4
80-43-3	Bis(1-methyl-1-phenylethyl) peroxide	270.372	6.0288	1.06856e+06	9549.93	0.317567	0.00388776	0.0253033	-1.59682	-	51	N	CC(C)c1ccccc1OOc1ccccc1C(C)C	organic	4	Transient	2
108-90-7	Chlorobenzene	112.56	2.88	758.578	234.423	498	1581	0.127189	-0.89555	-	23	N	Clc1ccccc1	organic	1	Transient	3
75-00-3	Chloroethane	64.51	1.43	26.9153	6.54214	6710	160000	0.425021	-0.37159	-	17	N	CCCl	organic	3	Unstable MOC	5
75-01-4	Chloroethene	62.5	1.52	33.1131	6.3498	1100	396340	9.08914	0.958523	-	17	N	C=CCl	organic	3	Unstable MOC	5
74-87-3	Chloromethane	50.49	0.91	8.12831	13.213	5320	573290	0.360837	-0.442689	-	16	N	CCl	pseudorganic	2	Unstable MOC	4
75-77-4	Chlorotrimethylsilane	108.64	2.55382	357.946	-	66815	30920	1.61757	0.208864	-	18	N	C[Si](C)(C)Cl	organosilicon	Unstable MOC	Unstable MOC	5
107-66-4	Dibutyl ester phosphoric acid	248.3	-0.128298	0.744221	5.21795e-09	2.75629e+12	0.2839	2e-05	-4.69897	-	9	1.2175	CCCCOP(=O)([O-])OCCCC.[K+]	organic salt/mixture	4.5-5	4.5-5	5
75-71-8	Dichlorodifluoromethane	120.91	2.24571	176.078	10.5225	280	646505	14.0269	1.14696	-	44	N	FC(F)(Cl)Cl	pseudorganic	4.5	Unstable MOC	4
119-61-9	Diphenyl-methanone	182.222	3.18	1513.56	1137.63	137	0.257269	1.58489e-05	-4.8	-	18	N	O=C(c1ccccc1)c1ccccc1	organic	Transient	Transient	2
85-42-7	Hexahydro-1,3-isobenzofurandione	154.165	0.801387	6.32975	199.526	118526	93	0.000439622	-3.35692	-	21	N	O=C1C2CCCCC2C(=O)O1	organic	Transient	Transient	3
119-65-3	Isoquinoline	129.162	1.45553	28.5452	69.67	130594	93.3	0.000972795	-3.01198	-	19	5.4	c1ccc2cnccc2c1	organic	2	Unstable MOC	4
330-54-1	N'-(3,4-dichlorophenyl)-N,N-dimethyl-urea	233.09	2.84	691.831	139.894	29	2e-06	6.48851e-09	-8.18786	2241	4.51	N	CN(C)C(=O)Nc1cc(c(cc1)Cl)Cl	organic	4	1	3
103-90-2	N-(4-hydroxyphenyl)-acetamide	151.165	0.210209	1.62259	0.981748	14000	0.0083657	1.01138e-11	-10.9951	-	11	amphoprotic	CC(=O)Nc1ccc(O)cc1	organic	Unstable MOC	Unstable MOC	5
97-74-5	N,N,N',N'-tetramethyl-thiodicarbonic diamide ([(H2N)C(S)]2S)	208.36	1.93865	86.8267	-	308	0.0193493	0.000355787	-3.44881	-	24	N	CN(C)C(=S)SC(=S)N(C)C	organic	4	Transient	3
60-00-4	N,N'-1,2-ethanediylbis[N-(carboxymethyl)-glycine	292.244	-7.1798	6.60998e-08	-	1000	1.9995e-10	2.35962e-14	-13.6272	-	6	amphoprotic	OC(=O)CN(CCN(CC(=O)O)CC(=O)O)CC(=O)O	organic	1	1	3
97-39-2	N,N'-bis(2-methylphenyl)-guanidine	239.322	2.80717	641.454	-	5.99333e+07	3.86091e-05	7.82826e-08	-7.10633	-	107	9.93257	Cc1ccccc1NC(=N)Nc1ccccc1C	organic	5	5	5
67-43-6	N,N-bis[2-[bis(carboxymethyl)amino]ethyl]-glycine	393.349	-8.75681	1.7506e-09	-	4800	8.06517e-15	3.0706e-26	-25.5128	-	8	amphoprotic	OC(=O)CN(CCN(CCN(CC(=O)O)CC(=O)O)CC(=O)O)CC(=O)O	organic	4.5	4.5	4
284-95-7, 2680-03-7	N,N-dimethyl-2-propenamide	99.133	-0.24	0.57544	17.7828	200227	280.788	8.98499e-06	-5.04648	-	11	N	CN(C)C(=O)C=C	organic	Unstable MOC	Unstable MOC	4
102-06-7	N,N'-diphenyl-guanidine	211.268	2.01364	103.19	-	7.88559e+08	0.000303074	1.93738e-11	-10.7128	-	68	9.72952	N=C(Nc1ccccc1)Nc1ccccc1	organic	Unstable MOC	Unstable MOC	5
102-08-9	N,N'-diphenyl-thiourea	228.31	2	100	-	25.65	0.000185208	9.84249e-07	-6.00689	-	17	amphoprotic	S=C(Nc1ccccc1)Nc1ccccc1	organic	Transient	Transient	2
5026-74-4	N-[4-(2-oxiranylmethoxy)phenyl]-N-(2-oxiranylmethyl)-2-oxiranemethanamine	277.32	0.926512	8.4433	72.2634	3933.95	1316.7	0.0441264	-1.3553	-	114	3.25	C1C(O1)CN(CC1CO1)c1ccc(cc1)OCC1CO1	organic	2	Unstable MOC	4
3030-47-5	N1-[2-(dimethylamino)ethyl]-N1,N2,N2-trimethyl-1,2-ethanediamine	173.304	-2.1	0.00794328	-	1.40884e+07	44.608	4.99066e-08	-7.30184	-	9.67	polyprotic	CN(C)CCN(C)CCN(C)C	organic	5	5	5
91-20-3	Naphthalene	128.174	3.3125	2053.53	346.21	31.7	10.5	0.0171359	-1.76609	3	3.02	N	c1ccc2ccccc2c1	organic	4	Transient	3
3622-84-2	N-butyl-benzenesulfonamide	213.3	2.24968	177.698	-	450	0.0172632	4.5931e-05	-4.33789	1011	4.32	-	CCCCNS(=O)(=O)c1ccccc1	organic	4	4	3
461-58-5	N-cyanoguanidine	84.082	-1.01128	0.0974371	-	1.53385e+06	2.53983	1.63762e-08	-7.78579	-	4.09	2.42	NC(=N)NC#N	organic	3	3	5
3710-84-7	N-ethyl-N-hydroxy-ethanamine	89.138	-0.17	0.676083	-	348300	2200	0.000227251	-3.64349	-	14	amphoprotic	CCN(O)CC	organic	Unstable MOC	Unstable MOC	5
98-95-3	Nitrobenzene	123.111	1.845	69.9842	55.5904	1900	32.6	0.000852585	-3.06926	-	5.25	N	O=N(=O)c1ccccc1	organic	4.5	Unstable MOC	4
100-61-8	N-methyl-benzenamine	107.156	0.752618	5.65741	1.94777	5620	59.8	0.000363078	-3.44	-	25	4.85	CNc1ccccc1	organic	5	Unstable MOC	5
56-23-5	Tetrachloromethane	153.81	2.76333	579.874	84.1395	846.1	15200	1.0817	0.0341085	-	97	N	ClC(Cl)(Cl)Cl	pseudorganic	4.5	Unstable MOC	4
67-66-3	Trichloromethane	119.37	1.96	91.2011	100	8700	26200	0.162181	-0.79	-	45	N	ClC(Cl)Cl	pseudorganic	4.5	Unstable MOC	4
78-40-0	Triethyl ester phosphoric acid	182.156	0.8	6.30957	0.544753	500000	52.085	2.11349e-06	-5.675	-	10	N	CCOP(=O)(OCC)OCC	organic	Unstable MOC	Unstable MOC	5
	Average	202.465	1.2154	5.85776e+07	744.671	5.30258e+10	21997.8	2.40118	-5.71684	434	69.5918
	Max	818.49	9.86065	7.25513e+09	10220	3.27336e+12	646505	260.336	2.41553	2241	1619
	Median	165.016	1.8475	70.3894	52.4807	3294.02	3.03295	4.98171e-05	-4.30395	191	20
	Min	46.069	-11.151	7.06331e-12	5.21795e-09	4.2e-05	1.24494e-23	4.66199e-33	-32.3314	3	3.02
	5th percentile	88.1126	-4.0315	9.90192e-05	0.0064653	0.0869841	1.00052e-11	2.0617e-16	-15.6879	3	4.398
	95th percentile	415.474	5.51587	430462	4891.26	2.52292e+09	32829.5	1.45386	0.160124	1552.2	228.6

## Sheet: Table S3
Table S3: Modelled fate of PMT substances using the predicted environmental half-lives to estimate persistence
		Elimination in the primary settler		Elimination in the aerator		Elimination in the solids liquid separator
Name	CAS #	Volatilization (%)	Via primary sludge(%)	Stripping(%)	Biodegradation(%)	Volatilization(%)	Via surplus sludge(%)	Evaporation into Air (%)	Partition into Sludge (%)	Total elimination from waste water(%)	Total emission via effluent(%)	Contains Halogen?	Contains P?	Contains N?	Contains S?	Contains Si?
(17α)-hydroxy-19-norpregn-4-en-20-yn-3-one	CAS_RN:68-22-4	0	6.31	0	1.91	0	3.23	0	9.54	11.45	88.55	0	0	0	0	0
(1E)-1,2-dichloroethene	CAS_RN:156-60-5	4.58	0.36	83.71	4.53	1.83	0.02	90.12	0.38	95.03	4.97	1	0	0	0	0
(1-methylethyl)-benzene	CAS_RN:98-82-8	4.18	7.04	79.61	0.59	1.34	0.35	85.13	7.39	93.11	6.89	0	0	0	0	0
(2-hydroxy-4-methoxyphenyl)phenyl-methanone	CAS_RN:131-57-7	0	6.67	0	6.04	0	3.26	0	9.93	15.97	84.03	0	0	0	0	0
1,1'-(methylenedi-4,1-phenylene)bis-1H-Pyrrole-2,5-dione	CAS_RN:13676-54-5	0	0.69	0	0.12	0	0.36	0	1.05	1.17	98.83	0	0	1	0	0
1,1'-(phenylphosphinylidene)bis[1-(2,4,6-trimethylphenyl)-methanone	CAS_RN:162881-26-7	0	32.74	0	0.71	0	16.5	0	49.24	49.95	50.05	0	1	0	0	0
1,1,1,3,3,3-hexafluoro-2-Propanol	CAS_RN:920-66-1	0.67	3.6	5.35	3.42	2.46	1.77	8.48	5.37	17.27	82.73	1	0	0	0	0
1,1,1,3,3,3-hexamethyl-disiloxane	CAS_RN:107-46-0	4.47	4.1	86.02	0.11	0.86	0.12	91.35	4.22	95.68	4.32	0	0	0	0	1
1,1,1-trichloroethane	CAS_RN:71-55-6	4.68	0.27	87.33	2.45	1.27	0.01	93.28	0.28	96.01	3.99	1	0	0	0	0
1,1,1-trifluoro-methanesulfonic acid	CAS_RN:1493-13-6	0.04	0	0.28	3.48	0.15	0	0.47	0	3.95	96.05	1	0	0	1	0
1,1,2,2-tetrachloroethene	CAS_RN:127-18-4	4.61	1.23	86.03	0.54	1.24	0.05	91.88	1.28	93.7	6.3	1	0	0	0	0
1,1,2-trichloroethane	CAS_RN:79-00-5	3.66	0.45	52.12	2.65	5.79	0.1	61.57	0.55	64.77	35.23	1	0	0	0	0
1,1,2-trichloroethene	CAS_RN:79-01-6	4.57	1.19	84.8	7.85	1.53	0.06	90.9	1.25	100	0	1	0	0	0	0
1,1'-cyclohexylidenebis[2-(1,1-dimethylethyl)peroxide]	CAS_RN:3006-86-8	0.04	1.71	0.27	2.54	0.14	0.89	0.45	2.6	5.59	94.41	0	0	0	0	0
1,1-dichloroethylene	CAS_RN:75-35-4	4.68	0.59	87.82	5.67	1.14	0.02	93.64	0.61	99.92	0.08	1	0	0	0	0
1,1'-oxybis[2-methoxy-ethane]	CAS_RN:111-96-6	0	0.01	0.03	3.51	0.02	0	0.05	0.01	3.57	96.43	0	0	0	0	0
1,1'-oxybis-methane	CAS_RN:115-10-6	2.56	0	25.41	4.84	6.38	0	34.35	0	39.19	60.81	0	0	0	0	0
1,1'-sulfinylbis-methane	CAS_RN:67-68-5	0	0	0	13	0	0	0	0	13	87	0	0	0	1	0
1,2,3,4-tetrahydro-naphthalene	CAS_RN:119-64-2	4.26	1.68	74.12	0.12	3.05	0.18	81.43	1.86	83.41	16.59	0	0	0	0	0
1,2,3-trichlorobenzene	CAS_RN:87-61-6	3.21	13.04	52.59	3.11	4.07	2.46	59.87	15.5	78.48	21.52	1	0	0	0	0
1,2,3-trichloropropane	CAS_RN:96-18-4	2.78	0.39	30.77	9.65	6.79	0.14	40.34	0.53	50.52	49.48	1	0	0	0	0
1,2,4-trichlorobenzene	CAS_RN:120-82-1	3.72	5.82	60.56	0.1	4.18	0.98	68.46	6.8	75.36	24.64	1	0	0	0	0
1,2-benzisothiazol-3(2H)-one 1,1-dioxide	CAS_RN:81-07-2	0	0.26	0	14.68	0	0.14	0	0.4	15.08	84.92	0	0	1	1	0
1,2-dibromoethane	CAS_RN:106-93-4	0.12	0.02	0.88	6.65	0.45	0.01	1.45	0.03	8.13	91.87	1	0	0	0	0
1,2-dichlorobenzene	CAS_RN:95-50-1	4.12	1.68	69.3	0.87	3.7	0.23	77.12	1.91	79.9	20.1	1	0	0	0	0
1,2-dichloroethane	CAS_RN:107-06-2	3.95	0.12	57.89	4.79	4.69	0.02	66.53	0.14	71.46	28.54	1	0	0	0	0
1,2-dichloropropane	CAS_RN:78-87-5	4.38	0.13	76.22	12.93	2.98	0.01	83.58	0.14	96.65	3.35	1	0	0	0	0
1,2-dihydro-acenaphthylene	CAS_RN:83-32-9	1.64	13.51	15.61	3.09	4.9	5.65	22.15	19.16	44.4	55.6	0	0	0	0	0
1,3,5,7-Tetraazatricyclo[3.3.1.13,7]decane	CAS_RN:100-97-0	0	0.01	0	0.57	0	0	0	0.01	0.58	99.42	0	0	1	0	0
1,3,5-Triazine-2,4,6(1H,3H,5H)-trione	CAS_RN:108-80-5	0	0	0	6.72	0	0	0	0	6.72	93.28	0	0	1	0	0
1,3,5-Triazine-2,4,6-triamine	CAS_RN:108-78-1	0	0.17	0	22.3	0	0.07	0	0.24	22.54	77.46	0	0	1	0	0
1,3,5-trimethyl-benzene	CAS_RN:108-67-8	4.22	6.01	79.44	0.67	1.52	0.33	85.18	6.34	92.19	7.81	0	0	0	0	0
1,3-Dichloro-, 2,2',2''-phosphate 2-propanol	CAS_RN:13674-87-8	0.02	8.93	0.12	0.09	0.06	4.65	0.2	13.58	13.87	86.13	1	0	0	0	0
1,3-dichlorobenzene	CAS_RN:541-73-1	3.89	7.24	69.39	4.67	2.87	0.81	76.15	8.05	88.87	11.13	1	0	0	0	0
1,4-Diazabicyclo[2.2.2]octane	CAS_RN:280-57-9	0.12	0.08	0.87	3.44	0.45	0.04	1.44	0.12	5	95	0	0	1	0	0
1,4-dioxane	CAS_RN:123-91-1	0.09	0	0.63	12.49	0.32	0	1.04	0	13.53	86.47	0	0	0	0	0
1,8-Naphthalenediamine	CAS_RN:479-27-6	0	0.43	0	3.75	0	0.23	0	0.66	4.41	95.59	0	0	1	0	0
1-bromo-3-chloropropane	CAS_RN:109-70-6	4.05	0.65	65.06	0.95	4.38	0.11	73.49	0.76	75.2	24.8	1	0	0	0	0
1-Chloro-, 2,2',2''-phosphate 2-propanol	CAS_RN:13674-84-5	0.01	2.45	0.04	29.12	0.02	0.9	0.07	3.35	32.54	67.46	1	1	0	0	0
1-chloro-4-nitrobenzene	CAS_RN:100-00-5	0.09	1.11	0.7	2.06	0.36	0.57	1.15	1.68	4.89	95.11	0	0	1	0	0
1H-Benzotriazole	CAS_RN:95-14-7	0	41.88	0	2.47	0	20.14	0	62.02	64.49	35.51	0	0	1	0	0
1-methyl-1-phenylethylhydroperoxide	CAS_RN:80-15-9	0.03	10.5	0.21	5.1	0.11	5.15	0.35	15.65	21.1	78.9	0	0	0	0	0
1-methyl-2-nitro-benzene	CAS_RN:88-72-2	0.23	0.39	1.79	3.37	0.9	0.2	2.92	0.59	6.88	93.12	0	0	1	0	0
1-methyl-4-nitro-benzene	CAS_RN:99-99-0	0.11	0.93	0.79	3.39	0.42	0.49	1.32	1.42	6.13	93.87	0	0	1	0	0
2-(1,3-dihydro-3-oxo-2H-indol-2-ylidene)-1,2-dihydro-3H-indol-3-one	CAS_RN:482-89-3	0	5.85	0	1.29	0	3.02	0	8.87	10.16	89.84	0	0	1	0	0
2-(1-methylpropyl)-4,6-dinitrophenol	CAS_RN:88-85-7	0	0	0.01	0.13	0	0	0.01	0	0.14	99.86	0	0	1	0	0
2-(2H-benzotriazol-2-yl)-4-methyl-phenol	CAS_RN:2440-22-4	0	8.47	0	4.74	0	4.19	0	12.66	17.4	82.6	0	0	1	0	0
2,2'-(1,2-diazenediyl)bis[2-methyl-butanenitrile]	CAS_RN:13472-08-7	0.01	0.53	0.06	29.92	0.03	0.2	0.1	0.73	30.75	69.25	0	0	1	0	0
2,2'-(1,2-diazenediyl)bis[2-methyl-propanenitrile]	CAS_RN:78-67-1	0	0.89	0.02	6.29	0.01	0.47	0.03	1.36	7.68	92.32	0	0	1	0	0
2,2'-(1,2-ethenediyl)bis[5-amino-benzenesulfonic acid]	CAS_RN:81-11-8	0	0.04	0	0.12	0	0.02	0	0.06	0.18	99.82	0	0	1	1	0
2,2,2-trifluoro-acetic acid	CAS_RN:76-05-1	0	0.27	0.02	9.76	0.01	0.14	0.03	0.41	10.2	89.8	1	0	0	0	0
2,2'-[(2,2',5,5'-tetrachloro[1,1'-biphenyl]-4,4'-diyl)bis(2,1-diazenediyl)]bis[N-(2,4-dimethylphenyl)-3-oxo-butanamide]	CAS_RN:22094-93-5	0	0.35	0	0.1	0	0.19	0	0.54	0.64	99.36	1	0	1	0	0
2,2'-[(3,3'-dichloro[1,1'-biphenyl]-4,4'-diyl)bis(2,1-diazenediyl)]bis[N-(2-methylphenyl)-3-oxo-butanamide]	CAS_RN:5468-75-7	0	0.35	0	0.13	0	0.19	0	0.54	0.67	99.33	1	0	1	0	0
2,2'-[(3,3'-dichloro[1,1'-biphenyl]-4,4'-diyl)bis(2,1-diazenediyl)]bis[N-(4-chloro-2,5-dimethoxyphenyl)-3-oxo-butanamide]	CAS_RN:5567-15-7	0	0.31	0	0.13	0	0.16	0	0.47	0.6	99.4	1	0	1	0	0
2,2'-[(3,3'-dichloro[1,1'-biphenyl]-4,4'-diyl)bis(2,1-diazenediyl)]bis[N-(4-methylphenyl)-3-oxo-butanamide]	CAS_RN:6358-37-8	0	0.41	0	1.23	0	0.22	0	0.63	1.86	98.14	1	0	1	0	0
2,2'-oxybis[N,N-dimethyl-ethanamine]	CAS_RN:3033-62-3	0.34	0.04	2.04	21.81	1.01	0.02	3.39	0.06	25.26	74.74	0	0	1	0	0
2,2'-oxybis-propane	CAS_RN:108-20-3	4.35	0.03	74.09	1.17	3.13	0	81.57	0.03	82.77	17.23	0	0	0	0	0
2,3,4,6,7,8,9,10-octahydro-pyrimido[1,2-a]azepine	CAS_RN:6674-22-2	0.42	0	3.1	6.48	1.51	0	5.03	0	11.51	88.49	0	0	1	0	0
2,4,6,8-tetraethenyl-2,4,6,8-tetramethyl-cyclotetrasiloxane	CAS_RN:2554-06-5	3.97	11.17	79.72	0.14	0.8	0.35	84.49	11.52	96.15	3.85	0	0	0	0	1
2,4,6-tribromophenol	CAS_RN:118-79-6	0	0.01	0.02	12.58	0.01	0	0.03	0.01	12.62	87.38	1	0	0	0	0
2,4,7,9-tetramethyl-5-decyne-4,7-diol	CAS_RN:126-86-3	0.1	0.39	0.62	17.53	0.32	0.17	1.04	0.56	19.13	80.87	0	0	0	0	0
2,4-dichlorophenol	CAS_RN:120-83-2	0.03	0.01	0.19	3.47	0.1	0	0.32	0.01	3.8	96.2	1	0	0	0	0
2,4-diisocyanato-1-methyl-benzene	CAS_RN:584-84-9	0.02	0.62	0.14	5.39	0.07	0.31	0.23	0.93	6.55	93.45	0	0	1	0	0
2,6-dimethyl-benzenamine	CAS_RN:87-62-7	0.04	0.5	0.29	16.99	0.15	0.26	0.48	0.76	18.23	81.77	0	0	1	0	0
2-[[2-[2-(dimethylamino)ethoxy]ethyl]methylamino]-ethanol	CAS_RN:83016-70-0	0	0.69	0	56.88	0	0.08	0	0.77	57.65	42.35	0	0	1	0	0
2-amino-5-methyl-benzenesulfonic acid	CAS_RN:88-44-8	0	0.05	0	2.8	0	0.03	0	0.08	2.88	97.12	0	0	1	1	0
2-butoxy-, 1,1',1''-phosphate ethanol	CAS_RN:78-51-3	0	2.75	0	6.44	0	1.34	0	4.09	10.53	89.47	1	0	0	0	0
2-Chloro-, 1,1',1''-phosphate ethanol	CAS_RN:115-96-8	0	0.04	0.02	4.14	0.01	0.02	0.03	0.06	4.23	95.77	1	1	0	0	0
2-methoxy-2-methyl-propane	CAS_RN:1634-04-4	3.37	0.01	39.17	10.2	5.78	0	48.32	0.01	58.53	41.47	0	0	0	0	0
2-methyl-1-[4-(methylthio)phenyl]-2-(4-morpholinyl)-1-propanone	CAS_RN:71868-10-5	0	0.52	0	3.67	0	0.27	0	0.79	4.46	95.54	0	0	1	1	0
2-methyl-2-[(1-oxo-2-propen-1-yl)amino]-1-propanesulfonic acid	CAS_RN:15214-89-8	0	0	0	22.36	0	0	0	0	22.36	77.64	0	0	1	1	0
2-methyl-4,6-bis[(octylthio)methyl]-phenol	CAS_RN:110553-27-0	0	0.68	0	0.11	0	0.36	0	1.04	1.15	98.85	0	0	0	0	0
2-methyl-benzenesulfonamide	CAS_RN:88-19-7	0	0.65	0	56.91	0	0.08	0	0.73	57.64	42.36	0	0	1	1	0
2-nitropropane	CAS_RN:79-46-9	0.79	0	5.91	6.27	2.68	0	9.38	0	15.65	84.35	0	0	1	0	0
3a,4,7,7a-tetrahydro-4,7-methano-1H-indene	CAS_RN:77-73-6	4	4.82	69.57	3.26	3.2	0.58	76.77	5.4	85.43	14.57	0	0	0	0	0
3-chloro-benzenamine	CAS_RN:108-42-9	0.02	0.26	0.13	12.52	0.07	0.12	0.22	0.38	13.12	86.88	1	0	1	0	0
4,4'-methylenebis(cyclohexylamine)	CAS_RN:1761-71-3	0.01	0	0.01	6.71	0.05	0	0.07	0	6.78	93.22	0	0	1	0	0
4,4'-methylenebis[2-methyl-cyclohexanamine]	CAS_RN:6864-37-5	0	0	0	6.72	0	0	0	0	6.72	93.28	0	0	1	0	0
4,4'-methylenebis-benzenamine	CAS_RN:101-77-9	0	0.06	0	6.71	0	0.03	0	0.09	6.8	93.2	0	0	1	0	0
4,4'-oxybis-, 1,1'-dihydrazide benzenesulfonic acid	CAS_RN:80-51-3	0	2.4	0	3.7	0	1.26	0	3.66	7.36	92.64	0	0	1	1	0
4,4'-sulfonylbis-benzenamine	CAS_RN:80-08-0	0	0.02	0	6.66	0	0	0	0.02	6.68	93.32	0	0	1	1	0
4,4'-sulfonylbis-phenol	CAS_RN:80-09-1	0	0.51	0	7.53	0	0.25	0	0.76	8.29	91.71	0	0	0	1	0
4-amino-benzenesulfonic acid	CAS_RN:121-57-3	0	0.19	0	0.11	0	0.1	0	0.29	0.4	99.6	0	0	1	1	0
4-aminophenol	CAS_RN:123-30-8	0	0.03	0.01	22.34	0.01	0.01	0.02	0.04	22.4	77.6	0	0	1	0	0
4-ethenyl-cyclohexene	CAS_RN:100-40-3	4.31	4.12	79.03	1.05	1.81	0.26	85.15	4.38	90.58	9.42	0	0	0	0	0
4-ethenyl-pyridine	CAS_RN:100-43-6	0.19	0.32	1.36	6.58	0.69	0.15	2.24	0.47	9.29	90.71	0	0	1	0	0
5,5'-(1H-isoindole-1,3(2H)-diylidene)bis-2,4,6(1H,3H,5H)-pyrimidinetrione	CAS_RN:36888-99-0	0	0.04	0	17.75	0	0.02	0	0.06	17.81	82.19	0	0	1	0	0
5,5-diphenyl-2,4-imidazolidinedione	CAS_RN:57-41-0	0	0.76	0	3.43	0	0.38	0	1.14	4.57	95.43	0	0	1	0	0
5-amino-1,3,3-trimethyl-cyclohexanemethanamine	CAS_RN:2855-13-2	0.01	0.04	0.01	27.67	0.01	0.01	0.03	0.05	27.75	72.25	0	0	1	0	0
5-chloro-2-(2,4-dichlorophenoxy)-phenol	CAS_RN:3380-34-5	0	0.07	0	30.13	0	0.03	0	0.1	30.23	69.77	1	0	0	0	0
6-chloro-N2-ethyl-N4-(1-methylethyl)-1,3,5-triazine-2,4-diamine	CAS_RN:1912-24-9	0	1.45	0	0.76	0	0.76	0	2.21	2.97	97.03	1	0	1	0	0
Anthracene	CAS_RN:120-12-7	0.57	23.48	4.56	0.84	2.02	11.17	7.15	34.65	42.64	57.36	0	0	0	0	0
Benzothiazole	CAS_RN:95-16-9	0.18	0.48	1.39	5.88	0.71	0.25	2.28	0.73	8.89	91.11	0	0	1	1	0
Bis(1-methyl-1-phenylethyl) peroxide	CAS_RN:80-43-3	0.24	37.69	1.81	1.15	0.86	18.08	2.91	55.77	59.83	40.17	0	0	0	0	0
Chlorobenzene	CAS_RN:108-90-7	4.29	2.02	74.89	1.13	2.72	0.19	81.9	2.21	85.24	14.76	1	0	0	0	0
Chloroethane	CAS_RN:75-00-3	4.65	0.16	86.16	7.2	1.47	0.01	92.28	0.17	99.65	0.35	1	0	0	0	0
Chloroethene	CAS_RN:75-01-4	4.71	0.21	88.26	5.68	1.13	0.01	94.1	0.22	100	0	1	0	0	0	0
Chloromethane	CAS_RN:74-87-3	4.63	0.08	85.32	8.35	1.62	0	91.57	0.08	100	0	1	0	0	0	0
Chlorotrimethylsilane	CAS_RN:75-77-4	4.75	0.1	89.59	4.03	0.93	0	95.27	0.1	99.4	0.6	1	0	0	0	1
Dibutyl ester phosphoric acid	CAS_RN:107-66-4	0	0	0	12.59	0	0	0	0	12.59	87.41	0	1	0	0	0
Dichlorodifluoromethane	CAS_RN:75-71-8	4.72	0.62	89.19	1.1	0.91	0.02	94.82	0.64	96.56	3.44	1	0	0	0	1
Diphenyl-methanone	CAS_RN:119-61-9	0.01	8.92	0.09	5.8	0.04	4.35	0.14	13.27	19.21	80.79	0	0	0	0	0
Hexahydro-1,3-isobenzofurandione	CAS_RN:85-42-7	0	0.02	0	33.4	0.01	0.03	0.01	0.05	33.46	66.54	0	0	0	0	0
Isoquinoline	CAS_RN:119-65-3	0.16	0.62	1.17	7.74	0.6	0.3	1.93	0.92	10.59	89.41	0	0	1	0	0
N'-(3,4-dichlorophenyl)-N,N-dimethyl-urea	CAS_RN:330-54-1	0	1.24	0	29.64	0	0.46	0	1.7	31.34	68.66	1	0	1	0	0
N-(4-hydroxyphenyl)-acetamide	CAS_RN:103-90-2	0	0.01	0	12.58	0	0	0	0.01	12.59	87.41	0	0	1	0	0
N,N,N',N'-tetramethyl-thiodicarbonic diamide ([(H2N)C(S)]2S)	CAS_RN:97-74-5	0	0.11	0	33.35	0	0.03	0	0.14	33.49	66.51	0	0	1	1	0
N,N'-1,2-ethanediylbis[N-(carboxymethyl)-glycine	CAS_RN:60-00-4	0	0.05	0	47.43	0	0.01	0	0.06	47.49	52.51	0	0	1	0	0
N,N'-bis(2-methylphenyl)-guanidine	CAS_RN:97-39-2	0	4.65	0	1.32	0	2.4	0	7.05	8.37	91.63	0	0	1	0	0
N,N-bis[2-[bis(carboxymethyl)amino]ethyl]-glycine	CAS_RN:67-43-6	0	0.03	0	37.45	0	0	0	0.03	37.48	62.52	0	0	1	0	0
N,N-dimethyl-2-propenamide	CAS_RN:284-95-7, 2680-03-7	0	0.16	0	12.55	0	0.07	0	0.23	12.78	87.22	0	0	1	0	0
N,N'-diphenyl-guanidine	CAS_RN:102-06-7	0	17.04	0	1.56	0	8.67	0	25.71	27.27	72.73	0	0	1	0	0
N,N'-diphenyl-thiourea	CAS_RN:102-08-9	0	16.97	0	4.99	0	8.27	0	25.24	30.23	69.77	0	0	1	1	0
N-[4-(2-oxiranylmethoxy)phenyl]-N-(2-oxiranylmethyl)-2-oxiranemethanamine	CAS_RN:5026-74-4	0.11	0.39	0.85	0.96	0.44	0.2	1.4	0.59	2.95	97.05	0	0	1	0	0
N1-[2-(dimethylamino)ethyl]-N1,N2,N2-trimethyl-1,2-ethanediamine	CAS_RN:3030-47-5	0.08	0.04	0.52	12.5	0.27	0.02	0.87	0.06	13.43	86.57	0	0	1	0	0
Naphthalene	CAS_RN:91-20-3	2.94	2.96	24.39	28.88	4.51	0.66	31.84	3.62	64.34	35.66	0	0	0	0	0
N-butyl-benzenesulfonamide	CAS_RN:3622-84-2	0	0.66	0.02	0.14	0.01	0.35	0.03	1.01	1.18	98.82	0	0	1	1	0
N-cyanoguanidine	CAS_RN:461-58-5	0	0.23	0	26.38	0	0.09	0	0.32	26.7	73.3	0	0	1	0	0
N-ethyl-N-hydroxy-ethanamine	CAS_RN:3710-84-7	0.03	0.27	0.21	29.3	0.11	0.14	0.35	0.41	30.06	69.94	0	0	1	0	0
Nitrobenzene	CAS_RN:98-95-3	0.43	0.36	3.33	17.3	1.62	0.18	5.38	0.54	23.22	76.78	0	0	1	0	0
N-methyl-benzenamine	CAS_RN:100-61-8	0.17	0.02	1.21	6.62	0.62	0.01	2	0.03	8.65	91.35	0	0	1	0	0
Tetrachloromethane	CAS_RN:56-23-5	4.67	0.74	87.68	0.1	1.12	0.03	93.47	0.77	94.34	5.66	1	0	0	0	0
Trichloromethane	CAS_RN:67-66-3	4.44	0.44	78.94	4.89	2.54	0.04	85.92	0.48	91.29	8.71	1	0	0	0	0
Triethyl ester phosphoric acid	CAS_RN:78-40-0	0	0.01	0	33.41	0	0	0	0.01	33.42	66.58	0	1	0	0	0
	Percentage of PMT plastic additives											32.5203	4.06504	50.4065	13.0081	3.25203
	Percetage of high emission PMT plastic additives											23.4375	3.125	68.75	18.75	0
	Percentage of high emission PMT plastic additives among the plastic additives with the respective molecualr feature											37.5	40	70.9677	75	0

## Sheet: Table S4
Table S4: Ranked list of PMT plastic additives
	Priority Rank	Name	CAS #	Total emission via effluent with biodegradation (%)	Total emission via effluent without biodegradation (%)	Difference between modelled emission with and without biodegradation (%)
	1	2-(1-methylpropyl)-4,6-dinitrophenol	CAS_RN:88-85-7	99.86	99.99	0.13
	2	2,2'-(1,2-ethenediyl)bis[5-amino-benzenesulfonic acid]	CAS_RN:81-11-8	99.82	99.96	0.14
	3	4-amino-benzenesulfonic acid	CAS_RN:121-57-3	99.6	99.81	0.21
	4	1,3,5,7-Tetraazatricyclo[3.3.1.13,7]decane	CAS_RN:100-97-0	99.42	99.99	0.57
	5	2,2'-[(3,3'-dichloro[1,1'-biphenyl]-4,4'-diyl)bis(2,1-diazenediyl)]bis[N-(4-chloro-2,5-dimethoxyphenyl)-3-oxo-butanamide]	CAS_RN:5567-15-7	99.4	99.69	0.29
	6	2,2'-[(2,2',5,5'-tetrachloro[1,1'-biphenyl]-4,4'-diyl)bis(2,1-diazenediyl)]bis[N-(2,4-dimethylphenyl)-3-oxo-butanamide]	CAS_RN:22094-93-5	99.36	99.65	0.29
	7	2,2'-[(3,3'-dichloro[1,1'-biphenyl]-4,4'-diyl)bis(2,1-diazenediyl)]bis[N-(2-methylphenyl)-3-oxo-butanamide]	CAS_RN:5468-75-7	99.33	99.65	0.32
	8	2-methyl-4,6-bis[(octylthio)methyl]-phenol	CAS_RN:110553-27-0	98.85	99.32	0.47
	9	1,1'-(methylenedi-4,1-phenylene)bis-1H-Pyrrole-2,5-dione	CAS_RN:13676-54-5	98.83	99.31	0.48
	10	N-butyl-benzenesulfonamide	CAS_RN:3622-84-2	98.82	99.32	0.5
	11	2,2'-[(3,3'-dichloro[1,1'-biphenyl]-4,4'-diyl)bis(2,1-diazenediyl)]bis[N-(4-methylphenyl)-3-oxo-butanamide]	CAS_RN:6358-37-8	98.14	99.59	1.45
	12	2-amino-5-methyl-benzenesulfonic acid	CAS_RN:88-44-8	97.12	99.95	2.83
	13	N-[4-(2-oxiranylmethoxy)phenyl]-N-(2-oxiranylmethyl)-2-oxiranemethanamine	CAS_RN:5026-74-4	97.05	98.65	1.6
	14	6-chloro-N2-ethyl-N4-(1-methylethyl)-1,3,5-triazine-2,4-diamine	CAS_RN:1912-24-9	97.03	98.55	1.52
	15	1,1'-oxybis[2-methoxy-ethane]	CAS_RN:111-96-6	96.43	99.96	3.53
	16	2,4-dichlorophenol	CAS_RN:120-83-2	96.2	99.77	3.57
	17	1,1,1-trifluoro-methanesulfonic acid	CAS_RN:1493-13-6	96.05	99.68	3.63
	18	2-Chloro-, 1,1',1''-phosphate ethanol	CAS_RN:115-96-8	95.77	99.94	4.17
	19	1,8-Naphthalenediamine	CAS_RN:479-27-6	95.59	99.57	3.98
	20	2-methyl-1-[4-(methylthio)phenyl]-2-(4-morpholinyl)-1-propanone	CAS_RN:71868-10-5	95.54	99.48	3.94
	21	5,5-diphenyl-2,4-imidazolidinedione	CAS_RN:57-41-0	95.43	99.24	3.81
	22	1-chloro-4-nitrobenzene	CAS_RN:100-00-5	95.11	98.1	2.99
	23	1,4-Diazabicyclo[2.2.2]octane	CAS_RN:280-57-9	95	98.93	3.93
	24	1,1'-cyclohexylidenebis[2-(1,1-dimethylethyl)peroxide]	CAS_RN:3006-86-8	94.41	97.98	3.57
	25	1-methyl-4-nitro-benzene	CAS_RN:99-99-0	93.87	98.17	4.3
	26	2,4-diisocyanato-1-methyl-benzene	CAS_RN:584-84-9	93.45	99.22	5.77
	27	4,4'-sulfonylbis-benzenamine	CAS_RN:80-08-0	93.32	99.98	6.66
	28	1,3,5-Triazine-2,4,6(1H,3H,5H)-trione	CAS_RN:108-80-5	93.28	100	6.72
	29	4,4'-methylenebis[2-methyl-cyclohexanamine]	CAS_RN:6864-37-5	93.28	100	6.72
	30	4,4'-methylenebis(cyclohexylamine)	CAS_RN:1761-71-3	93.22	99.98	6.76
	31	4,4'-methylenebis-benzenamine	CAS_RN:101-77-9	93.2	99.94	6.74
	32	1-methyl-2-nitro-benzene	CAS_RN:88-72-2	93.12	97.59	4.47
	33	4,4'-oxybis-, 1,1'-dihydrazide benzenesulfonic acid	CAS_RN:80-51-3	92.64	97.6	4.96
	34	2,2'-(1,2-diazenediyl)bis[2-methyl-propanenitrile]	CAS_RN:78-67-1	92.32	99.09	6.77
	35	1,2-dibromoethane	CAS_RN:106-93-4	91.87	98.98	7.11
	36	4,4'-sulfonylbis-phenol	CAS_RN:80-09-1	91.71	99.49	7.78
	37	N,N'-bis(2-methylphenyl)-guanidine	CAS_RN:97-39-2	91.63	95.35	3.72
	38	N-methyl-benzenamine	CAS_RN:100-61-8	91.35	98.6	7.25
	39	Benzothiazole	CAS_RN:95-16-9	91.11	97.95	6.84
	40	4-ethenyl-pyridine	CAS_RN:100-43-6	90.71	98.13	7.42
	41	2-(1,3-dihydro-3-oxo-2H-indol-2-ylidene)-1,2-dihydro-3H-indol-3-one	CAS_RN:482-89-3	89.84	94.15	4.31
	42	2,2,2-trifluoro-acetic acid	CAS_RN:76-05-1	89.8	99.71	9.91
	43	2-butoxy-, 1,1',1''-phosphate ethanol	CAS_RN:78-51-3	89.47	97.25	7.78
	44	Isoquinoline	CAS_RN:119-65-3	89.41	98.05	8.64
	45	(17α)-hydroxy-19-norpregn-4-en-20-yn-3-one	CAS_RN:68-22-4	88.55	93.69	5.14
	46	2,3,4,6,7,8,9,10-octahydro-pyrimido[1,2-a]azepine	CAS_RN:6674-22-2	88.49	96.48	7.99
	47	Dibutyl ester phosphoric acid	CAS_RN:107-66-4	87.41	100	12.59
	48	N-(4-hydroxyphenyl)-acetamide	CAS_RN:103-90-2	87.41	99.99	12.58
	49	2,4,6-tribromophenol	CAS_RN:118-79-6	87.38	99.97	12.59
	50	N,N-dimethyl-2-propenamide	CAS_RN:284-95-7, 2680-03-7	87.22	99.84	12.62
	51	1,1'-sulfinylbis-methane	CAS_RN:67-68-5	87	100	13
	52	3-chloro-benzenamine	CAS_RN:108-42-9	86.88	99.59	12.71
	53	N1-[2-(dimethylamino)ethyl]-N1,N2,N2-trimethyl-1,2-ethanediamine	CAS_RN:3030-47-5	86.57	99.36	12.79
	54	1,4-dioxane	CAS_RN:123-91-1	86.47	99.28	12.81
	55	1,3-Dichloro-, 2,2',2''-phosphate 2-propanol	CAS_RN:13674-87-8	86.13	90.93	4.8
	56	1,2-benzisothiazol-3(2H)-one 1,1-dioxide	CAS_RN:81-07-2	84.92	99.74	14.82
	57	2-nitropropane	CAS_RN:79-46-9	84.35	93.3	8.95
	58	(2-hydroxy-4-methoxyphenyl)phenyl-methanone	CAS_RN:131-57-7	84.03	93.33	9.3
	59	1,1,1,3,3,3-hexafluoro-2-Propanol	CAS_RN:920-66-1	82.73	90.38	7.65
	60	2-(2H-benzotriazol-2-yl)-4-methyl-phenol	CAS_RN:2440-22-4	82.6	91.53	8.93
	61	5,5'-(1H-isoindole-1,3(2H)-diylidene)bis-2,4,6(1H,3H,5H)-pyrimidinetrione	CAS_RN:36888-99-0	82.19	99.96	17.77
	62	2,6-dimethyl-benzenamine	CAS_RN:87-62-7	81.77	99.17	17.4
	63	2,4,7,9-tetramethyl-5-decyne-4,7-diol	CAS_RN:126-86-3	80.87	98.89	18.02
	64	Diphenyl-methanone	CAS_RN:119-61-9	80.79	90.98	10.19
	65	1-methyl-1-phenylethylhydroperoxide	CAS_RN:80-15-9	78.9	89.26	10.36
	66	2-methyl-2-[(1-oxo-2-propen-1-yl)amino]-1-propanesulfonic acid	CAS_RN:15214-89-8	77.64	100	22.36
	67	4-aminophenol	CAS_RN:123-30-8	77.6	99.96	22.36
	68	1,3,5-Triazine-2,4,6-triamine	CAS_RN:108-78-1	77.46	99.83	22.37
	69	Nitrobenzene	CAS_RN:98-95-3	76.78	95.88	19.1
	70	2,2'-oxybis[N,N-dimethyl-ethanamine]	CAS_RN:3033-62-3	74.74	97.58	22.84
	71	N-cyanoguanidine	CAS_RN:461-58-5	73.3	99.77	26.47
	72	N,N'-diphenyl-guanidine	CAS_RN:102-06-7	72.73	82.96	10.23
	73	5-amino-1,3,3-trimethyl-cyclohexanemethanamine	CAS_RN:2855-13-2	72.25	99.94	27.69
	74	N-ethyl-N-hydroxy-ethanamine	CAS_RN:3710-84-7	69.94	99.49	29.55
	75	5-chloro-2-(2,4-dichlorophenoxy)-phenol	CAS_RN:3380-34-5	69.77	99.93	30.16
	76	N,N'-diphenyl-thiourea	CAS_RN:102-08-9	69.77	83.03	13.26
	77	2,2'-(1,2-diazenediyl)bis[2-methyl-butanenitrile]	CAS_RN:13472-08-7	69.25	99.4	30.15
	78	N'-(3,4-dichlorophenyl)-N,N-dimethyl-urea	CAS_RN:330-54-1	68.66	98.76	30.1
	79	1-Chloro-, 2,2',2''-phosphate 2-propanol	CAS_RN:13674-84-5	67.46	97.5	30.04
	80	Triethyl ester phosphoric acid	CAS_RN:78-40-0	66.58	99.98	33.4
	81	Hexahydro-1,3-isobenzofurandione	CAS_RN:85-42-7	66.54	99.98	33.44
	82	N,N,N',N'-tetramethyl-thiodicarbonic diamide ([(H2N)C(S)]2S)	CAS_RN:97-74-5	66.51	99.89	33.38
	83	N,N-bis[2-[bis(carboxymethyl)amino]ethyl]-glycine	CAS_RN:67-43-6	62.52	99.97	37.45
	84	1,1'-oxybis-methane	CAS_RN:115-10-6	60.81	72.03	11.22
	85	Anthracene	CAS_RN:120-12-7	57.36	71.39	14.03
	86	1,2-dihydro-acenaphthylene	CAS_RN:83-32-9	55.6	69.24	13.64
	87	N,N'-1,2-ethanediylbis[N-(carboxymethyl)-glycine	CAS_RN:60-00-4	52.51	99.95	47.44
	88	1,1'-(phenylphosphinylidene)bis[1-(2,4,6-trimethylphenyl)-methanone	CAS_RN:162881-26-7	50.05	67.26	17.21
	89	1,2,3-trichloropropane	CAS_RN:96-18-4	49.48	66.06	16.58
	90	2-methyl-benzenesulfonamide	CAS_RN:88-19-7	42.36	99.35	56.99
	91	2-[[2-[2-(dimethylamino)ethoxy]ethyl]methylamino]-ethanol	CAS_RN:83016-70-0	42.35	99.31	56.96
	92	2-methoxy-2-methyl-propane	CAS_RN:1634-04-4	41.47	57.45	15.98
	93	Bis(1-methyl-1-phenylethyl) peroxide	CAS_RN:80-43-3	40.17	60.26	20.09
	94	Naphthalene	CAS_RN:91-20-3	35.66	69.71	34.05
	95	1H-Benzotriazole	CAS_RN:95-14-7	35.51	58.12	22.61
	96	1,1,2-trichloroethane	CAS_RN:79-00-5	35.23	43.77	8.54
	97	1,2-dichloroethane	CAS_RN:107-06-2	28.54	38.04	9.5
	98	1-bromo-3-chloropropane	CAS_RN:109-70-6	24.8	30.24	5.44
	99	1,2,4-trichlorobenzene	CAS_RN:120-82-1	24.64	29.9	5.26
	100	1,2,3-trichlorobenzene	CAS_RN:87-61-6	21.52	31.16	9.64
	101	1,2-dichlorobenzene	CAS_RN:95-50-1	20.1	24.9	4.8
	102	2,2'-oxybis-propane	CAS_RN:108-20-3	17.23	21.53	4.3
	103	1,2,3,4-tetrahydro-naphthalene	CAS_RN:119-64-2	16.59	19.94	3.35
	104	Chlorobenzene	CAS_RN:108-90-7	14.76	18.8	4.04
	105	3a,4,7,7a-tetrahydro-4,7-methano-1H-indene	CAS_RN:77-73-6	14.57	21.61	7.04
	106	1,3-dichlorobenzene	CAS_RN:541-73-1	11.13	19.48	8.35
	107	4-ethenyl-cyclohexene	CAS_RN:100-40-3	9.42	12.54	3.12
	108	Trichloromethane	CAS_RN:67-66-3	8.71	16.18	7.47
	109	1,3,5-trimethyl-benzene	CAS_RN:108-67-8	7.81	10.33	2.52
	110	(1-methylethyl)-benzene	CAS_RN:98-82-8	6.89	9.17	2.28
	111	1,1,2,2-tetrachloroethene	CAS_RN:127-18-4	6.3	8.13	1.83
	112	Tetrachloromethane	CAS_RN:56-23-5	5.66	6.91	1.25
	113	(1E)-1,2-dichloroethene	CAS_RN:156-60-5	4.97	11.35	6.38
	114	1,1,1,3,3,3-hexamethyl-disiloxane	CAS_RN:107-46-0	4.32	5.41	1.09
	115	1,1,1-trichloroethane	CAS_RN:71-55-6	3.99	7.72	3.73
	116	2,4,6,8-tetraethenyl-2,4,6,8-tetramethyl-cyclotetrasiloxane	CAS_RN:2554-06-5	3.85	5.14	1.29
	117	Dichlorodifluoromethane	CAS_RN:75-71-8	3.44	5.47	2.03
	118	1,2-dichloropropane	CAS_RN:78-87-5	3.35	19.27	15.92
	119	Chlorotrimethylsilane	CAS_RN:75-77-4	0.6	5.56	4.96
	120	Chloroethane	CAS_RN:75-00-3	0.35	9.03	8.68
	121	1,1-dichloroethylene	CAS_RN:75-35-4	0.08	6.91	6.83
	122	1,1,2-trichloroethene	CAS_RN:79-01-6	0	9.44	9.44
	123	Chloroethene	CAS_RN:75-01-4	0	6.82	6.82
	124	Chloromethane	CAS_RN:74-87-3	0	9.97	9.97

## Sheet: Table S5
Table S5: Functions of PMT plastic additves
CAS_Number	Name	Total emission via effluent (%)	Function(s)	Antioxidant	Colorant	Heat Stabilizer	Light Stabilizer	Other Processing Aids	Crosslinking Agents	Oder Agent	Intermediates	Lubricant	Plasticizer	Solvent	Filler	Blowing Agent	Flame Retardant	Catalyst	Biocide	Monomer	Initiator	viscosity modifier	antistatic agent	other
68-22-4	(17α)-hydroxy-19-norpregn-4-en-20-yn-3-one	88.55	Other																					x
156-60-5	(1E)-1,2-dichloroethene	4.97	Blowing Agent													x
98-82-8	(1-methylethyl)-benzene	6.89	Catalyst, Colorant, Crosslinking Agent, Filler, Intermediates, Lubricant, Other Processing Aids		x			x	x		x	x			x			x
131-57-7	(2-hydroxy-4-methoxyphenyl)phenyl-methanone	84.03	Antioxidant, Colorant, Filler, Light Stabilizer, Other Processing Aids	x	x		x	x							x
13676-54-5	1,1'-(methylenedi-4,1-phenylene)bis-1H-Pyrrole-2,5-dione	98.83	Crosslinking Agent, Intermediates, Other Processing Aids					x	x		x
162881-26-7	1,1'-(phenylphosphinylidene)bis[1-(2,4,6-trimethylphenyl)-methanone	50.05	Catalyst, Colorant, Crosslinking Agent, Filler, Initiator, Other Processing Aids		x			x	x						x			x			x
920-66-1	1,1,1,3,3,3-hexafluoro-2-Propanol	82.73	Intermediates								x
107-46-0	1,1,1,3,3,3-hexamethyl-disiloxane	4.32	Colorant, Intermediates, Lubricant, Other Processing Aids		x			x			x	x
71-55-6	1,1,1-trichloroethane	3.99	Lubricant, Odor Agent, Other Processing Aids, Plasticizer, Solvent					x		x		x	x	x
1493-13-6	1,1,1-trifluoro-methanesulfonic acid	96.05	Other																					x
127-18-4	1,1,2,2-tetrachloroethene	6.3	Colorant, Intermediates, Lubricant, Other Processing Aids, Solvent		x			x			x	x		x
79-00-5	1,1,2-trichloroethane	35.23	Intermediates								x
79-01-6	1,1,2-trichloroethene	0	Catalyst, Colorant, Intermediates, Light Stabilizer, Lubricant, Odor Agent, Other Processing Aids, Solvent		x		x	x		x	x	x		x				x
3006-86-8	1,1'-cyclohexylidenebis[2-(1,1-dimethylethyl)peroxide]	94.41	Antioxidant, Catalyst, Crosslinking Agent, Initiator, Other Processing Aids, Plasticizer	x				x	x				x					x			x
75-35-4	1,1-dichloroethylene	0.08	Filler, Flame Retardant, Intermediates, Monomer, Odor Agent, Other Processing Aids					x		x	x				x		x			x
111-96-6	1,1'-oxybis[2-methoxy-ethane]	96.43	Lubricant, Other Processing Aids, Solvent					x				x		x
115-10-6	1,1'-oxybis-methane	60.81	Biocide, Blowing Agent, Colorant, Filler, Intermediates, Lubricant, Odor Agent, Other Processing Aids, Viscosity Modifier		x			x		x	x	x			x	x			x			x
67-68-5	1,1'-sulfinylbis-methane	87	Blowing Agent, Other Processing Aids, Solvent					x						x		x
119-64-2	1,2,3,4-tetrahydro-naphthalene	16.59	Colorant, Intermediates		x						x
87-61-6	1,2,3-trichlorobenzene	21.52	Other																					x
96-18-4	1,2,3-trichloropropane	49.48	Colorant, Crosslinking Agent, Intermediates, Monomer, Other Processing Aids, Solvent		x			x	x		x			x						x
120-82-1	1,2,4-trichlorobenzene	24.64	Other																					x
81-07-2	1,2-benzisothiazol-3(2H)-one 1,1-dioxide	84.92	Biocide, Colorant, Filler, Intermediates, Other Processing Aids		x			x			x				x				x
106-93-4	1,2-dibromoethane	91.87	Flame Retardant, Intermediates, Lubricant, Other Processing Aids					x			x	x					x
95-50-1	1,2-dichlorobenzene	20.1	Biocide, Colorant, Filler, Lubricant, Plasticizer, Solvent		x							x	x	x	x				x
107-06-2	1,2-dichloroethane	28.54	Intermediates, Monomer, Odor Agent, Other Processing Aids					x		x	x									x
78-87-5	1,2-dichloropropane	3.35	Other																					x
83-32-9	1,2-dihydro-acenaphthylene	55.6	Biocide, Colorant, Intermediates		x						x								x
100-97-0	1,3,5,7-Tetraazatricyclo[3.3.1.13,7]decane	99.42	Colorant, Crosslinking Agent, Filler, Intermediates, Monomer, Other Processing Aids		x			x	x		x				x					x
108-80-5	1,3,5-Triazine-2,4,6(1H,3H,5H)-trione	93.28	Biocide, Catalyst, Crosslinking Agent, Flame Retardant, Initiator, Intermediates, Light Stabilizer				x		x		x						x	x	x		x
108-78-1	1,3,5-Triazine-2,4,6-triamine	77.46	Colorant, Filler, Flame Retardant, Intermediates, Light Stabilizer, Monomer, Other Processing Aids, Plasticizer		x		x	x			x		x		x		x			x
108-67-8	1,3,5-trimethyl-benzene	7.81	Colorant, Crosslinking Agent, Filler, Lubricant, Other Processing Aids		x			x	x			x			x
13674-87-8	1,3-Dichloro-, 2,2',2''-phosphate 2-propanol	86.13	Flame Retardant, Plasticizer										x				x
541-73-1	1,3-dichlorobenzene	11.13	Other																					x
280-57-9	1,4-Diazabicyclo[2.2.2]octane	95	Catalyst, Colorant, Crosslinking Agent, Filler, Initiator, Intermediates, Other Processing Aids		x			x	x		x				x			x			x
123-91-1	1,4-dioxane	86.47	Colorant, Filler, Intermediates, Odor Agent, Other Processing Aids		x			x		x	x				x
479-27-6	1,8-Naphthalenediamine	95.59	Other																					x
109-70-6	1-bromo-3-chloropropane	24.8	Intermediates								x
13674-84-5	1-Chloro-, 2,2',2''-phosphate 2-propanol	67.46	Blowing Agent, Colorant, Filler, Flame Retardant, Intermediates, Other Processing Aids, Plasticizer		x			x			x		x		x	x	x
100-00-5	1-chloro-4-nitrobenzene	95.11	Other																					x
95-14-7	1H-Benzotriazole	35.51	Antioxidant, Biocide, Colorant, Filler, Light Stabilizer, Lubricant, Other Processing Aids	x	x		x	x				x			x				x
80-15-9	1-methyl-1-phenylethylhydroperoxide	78.9	Biocide, Catalyst, Colorant, Crosslinking Agent, Filler, Initiator, Intermediates, Lubricant, Monomer, Other Processing Aids		x			x	x		x	x			x			x	x	x	x
88-72-2	1-methyl-2-nitro-benzene	93.12	Other																					x
99-99-0	1-methyl-4-nitro-benzene	93.87	Other																					x
482-89-3	2-(1,3-dihydro-3-oxo-2H-indol-2-ylidene)-1,2-dihydro-3H-indol-3-one	89.84	Colorant		x
88-85-7	2-(1-methylpropyl)-4,6-dinitrophenol	99.86	Plasticizer										x
2440-22-4	2-(2H-benzotriazol-2-yl)-4-methyl-phenol	82.6	Antioxidant, Colorant, Filler, Intermediates, Light Stabilizer, Other Processing Aids	x	x		x	x			x				x
13472-08-7	2,2'-(1,2-diazenediyl)bis[2-methyl-butanenitrile]	69.25	Catalyst, Colorant, Crosslinking Agent, Initiator, Monomer, Other Processing Aids		x			x	x									x		x	x
78-67-1	2,2'-(1,2-diazenediyl)bis[2-methyl-propanenitrile]	92.32	Blowing Agent, Catalyst, Colorant, Crosslinking Agent, Filler, Initiator, Intermediates, Other Processing Aids		x			x	x		x				x	x		x			x
81-11-8	2,2'-(1,2-ethenediyl)bis[5-amino-benzenesulfonic acid]	99.82	Colorant		x
76-05-1	2,2,2-trifluoro-acetic acid	89.8	Other																					x
22094-93-5	2,2'-[(2,2',5,5'-tetrachloro[1,1'-biphenyl]-4,4'-diyl)bis(2,1-diazenediyl)]bis[N-(2,4-dimethylphenyl)-3-oxo-butanamide]	99.36	Biocide, Colorant, Filler, Lubricant, Other Processing Aids		x			x				x			x				x
5468-75-7	2,2'-[(3,3'-dichloro[1,1'-biphenyl]-4,4'-diyl)bis(2,1-diazenediyl)]bis[N-(2-methylphenyl)-3-oxo-butanamide]	99.33	Biocide, Colorant, Filler, Lubricant, Other Processing Aids		x			x				x			x				x
5567-15-7	2,2'-[(3,3'-dichloro[1,1'-biphenyl]-4,4'-diyl)bis(2,1-diazenediyl)]bis[N-(4-chloro-2,5-dimethoxyphenyl)-3-oxo-butanamide]	99.4	Biocide, Colorant, Filler, Intermediates, Lubricant, Other Processing Aids		x			x			x	x			x				x
6358-37-8	2,2'-[(3,3'-dichloro[1,1'-biphenyl]-4,4'-diyl)bis(2,1-diazenediyl)]bis[N-(4-methylphenyl)-3-oxo-butanamide]	98.14	Colorant, Filler		x										x
3033-62-3	2,2'-oxybis[N,N-dimethyl-ethanamine]	74.74	Catalyst, Colorant, Crosslinking Agent, Filler, Initiator, Intermediates, Other Processing Aids		x			x	x		x				x			x			x
108-20-3	2,2'-oxybis-propane	17.23	Other																					x
6674-22-2	2,3,4,6,7,8,9,10-octahydro-pyrimido[1,2-a]azepine	88.49	Colorant, Other Processing Aids		x			x
2554-06-5	2,4,6,8-tetraethenyl-2,4,6,8-tetramethyl-cyclotetrasiloxane	3.85	Colorant, Crosslinking Agent, Intermediates, Lubricant, Other Processing Aids		x			x	x		x	x
118-79-6	2,4,6-tribromophenol	87.38	Biocide, Flame Retardant, Intermediates, Other Processing Aids					x			x						x		x
126-86-3	2,4,7,9-tetramethyl-5-decyne-4,7-diol	80.87	Biocide, Colorant, Filler, Lubricant, Other Processing Aids		x			x				x			x				x
120-83-2	2,4-dichlorophenol	96.2	Other																					x
584-84-9	2,4-diisocyanato-1-methyl-benzene	93.45	Blowing Agent, Catalyst, Colorant, Crosslinking Agent, Filler, Intermediates, Monomer, Other Processing Aids		x			x	x		x				x	x		x		x
87-62-7	2,6-dimethyl-benzenamine	81.77	Other																					x
83016-70-0	2-[[2-[2-(dimethylamino)ethoxy]ethyl]methylamino]-ethanol	42.35	Colorant, Filler, Other Processing Aids		x			x							x
88-44-8	2-amino-5-methyl-benzenesulfonic acid	97.12	Colorant, Intermediates		x						x
78-51-3	2-butoxy-, 1,1',1''-phosphate ethanol	89.47	Colorant, Flame Retardant, Intermediates, Lubricant, Other Processing Aids, Plasticizer		x			x			x	x	x				x
115-96-8	2-Chloro-, 1,1',1''-phosphate ethanol	95.77	Flame Retardant, Intermediates, Odor Agent, Other Processing Aids, Plasticizer, Viscosity Modifier					x		x	x		x				x					x
1634-04-4	2-methoxy-2-methyl-propane	41.47	Other																					x
71868-10-5	2-methyl-1-[4-(methylthio)phenyl]-2-(4-morpholinyl)-1-propanone	95.54	Catalyst, Colorant, Crosslinking Agent, Filler, Initiator, Light Stabilizer, Other Processing Aids		x		x	x	x						x			x			x
15214-89-8	2-methyl-2-[(1-oxo-2-propen-1-yl)amino]-1-propanesulfonic acid	77.64	Intermediates, Monomer								x									x
110553-27-0	2-methyl-4,6-bis[(octylthio)methyl]-phenol	98.85	Antioxidant, Colorant, Heat Stabilizer, Light Stabilizer, Other Processing Aids	x	x	x	x	x
88-19-7	2-methyl-benzenesulfonamide	42.36	Colorant, Intermediates, Plasticizer		x						x		x
79-46-9	2-nitropropane	84.35	Colorant, Intermediates, Other Processing Aids, Solvent		x			x			x			x
77-73-6	3a,4,7,7a-tetrahydro-4,7-methano-1H-indene	14.57	Colorant, Filler, Intermediates, Lubricant, Monomer, Other Processing Aids, Plasticizer		x			x			x	x	x		x					x
108-42-9	3-chloro-benzenamine	86.88	Other																					x
1761-71-3	4,4'-methylenebis(cyclohexylamine)	93.22	Catalyst, Colorant, Crosslinking Agent, Filler, Initiator, Intermediates, Monomer, Other Processing Aids		x			x	x		x				x			x		x	x
6864-37-5	4,4'-methylenebis[2-methyl-cyclohexanamine]	93.28	Colorant, Crosslinking Agent, Filler, Intermediates, Monomer, Other Processing Aids		x			x	x		x				x					x
101-77-9	4,4'-methylenebis-benzenamine	93.2	Antioxidant, Catalyst, Colorant, Crosslinking Agent, Initiator, Intermediates, Lubricant, Monomer, Other Processing Aids	x	x			x	x		x	x						x		x	x
80-51-3	4,4'-oxybis-, 1,1'-dihydrazide benzenesulfonic acid	92.64	Blowing Agent, Crosslinking Agent, Other Processing Aids					x	x							x
80-08-0	4,4'-sulfonylbis-benzenamine	93.32	Catalyst, Crosslinking Agent, Initiator, Intermediates, Monomer, Other Processing Aids					x	x		x							x		x	x
80-09-1	4,4'-sulfonylbis-phenol	91.71	Biocide, Colorant, Flame Retardant, Monomer, Other Processing Aids		x			x									x		x	x
121-57-3	4-amino-benzenesulfonic acid	99.6	Plasticizer										x
123-30-8	4-aminophenol	77.6	Other																					x
100-40-3	4-ethenyl-cyclohexene	9.42	Flame Retardant, Intermediates, Odor Agent							x	x						x
100-43-6	4-ethenyl-pyridine	90.71	Other																					x
36888-99-0	5,5'-(1H-isoindole-1,3(2H)-diylidene)bis-2,4,6(1H,3H,5H)-pyrimidinetrione	82.19	Colorant		x
57-41-0	5,5-diphenyl-2,4-imidazolidinedione	95.43	Other																					x
2855-13-2	5-amino-1,3,3-trimethyl-cyclohexanemethanamine	72.25	Antistatic Agent, Colorant, Crosslinking Agent, Filler, Intermediates, Lubricant, Monomer, Other Processing Aids		x			x	x		x	x			x					x			x
3380-34-5	5-chloro-2-(2,4-dichlorophenoxy)-phenol	69.77	Biocide, Colorant, Light Stabilizer, Odor Agent		x		x			x									x
1912-24-9	6-chloro-N2-ethyl-N4-(1-methylethyl)-1,3,5-triazine-2,4-diamine	97.03	Other																					x
120-12-7	Anthracene	57.36	Antioxidant, Colorant, Plasticizer	x	x								x
95-16-9	Benzothiazole	91.11	Catalyst, Colorant, Crosslinking Agent, Initiator		x				x									x			x
80-43-3	Bis(1-methyl-1-phenylethyl) peroxide	40.17	Catalyst, Crosslinking Agent, Filler, Initiator, Intermediates, Lubricant, Other Processing Aids, Plasticizer, Viscosity Modifier					x	x		x	x	x		x			x			x	x
108-90-7	Chlorobenzene	14.76	Colorant, Crosslinking Agent, Filler, Intermediates, Other Processing Aids		x			x	x		x				x
75-00-3	Chloroethane	0.35	Other																					x
75-01-4	Chloroethene	0	Colorant, Filler, Flame Retardant, Intermediates, Monomer, Other Processing Aids		x			x			x				x		x			x
74-87-3	Chloromethane	0	Blowing Agent, Colorant, Intermediates, Other Processing Aids		x			x			x					x
75-77-4	Chlorotrimethylsilane	0.6	Colorant, Intermediates, Other Processing Aids		x			x			x
107-66-4	Dibutyl ester phosphoric acid	87.41	Filler, Intermediates, Lubricant, Other Processing Aids					x			x	x			x
75-71-8	Dichlorodifluoromethane	3.44	Other																					x
119-61-9	Diphenyl-methanone	80.79	Antioxidant, Biocide, Catalyst, Colorant, Crosslinking Agent, Filler, Initiator, Intermediates, Light Stabilizer, Odor Agent, Other Processing Aids	x	x		x	x	x	x	x				x			x	x		x
85-42-7	Hexahydro-1,3-isobenzofurandione	66.54	Colorant, Crosslinking Agent, Intermediates, Lubricant, Monomer, Other Processing Aids		x			x	x		x	x								x
119-65-3	Isoquinoline	89.41	Other Processing Aids					x
330-54-1	N'-(3,4-dichlorophenyl)-N,N-dimethyl-urea	68.66	Biocide, Catalyst, Crosslinking Agent, Initiator, Other Processing Aids					x	x									x	x		x
103-90-2	N-(4-hydroxyphenyl)-acetamide	87.41	Intermediates, Monomer								x									x
97-74-5	N,N,N',N'-tetramethyl-thiodicarbonic diamide ([(H2N)C(S)]2S)	66.51	Catalyst, Crosslinking Agent, Initiator, Other Processing Aids					x	x									x			x
60-00-4	N,N'-1,2-ethanediylbis[N-(carboxymethyl)-glycine	52.51	Antioxidant, Biocide, Catalyst, Colorant, Crosslinking Agent, Filler, Initiator, Intermediates, Lubricant, Odor Agent, Other Processing Aids	x	x			x	x	x	x	x			x			x	x		x
97-39-2	N,N'-bis(2-methylphenyl)-guanidine	91.63	Crosslinking Agent						x
67-43-6	N,N-bis[2-[bis(carboxymethyl)amino]ethyl]-glycine	62.52	Biocide, Colorant, Filler, Intermediates, Lubricant, Odor Agent, Other Processing Aids		x			x		x	x	x			x				x
284-95-7, 2680-03-7	N,N-dimethyl-2-propenamide	87.22	Monomer, Other Processing Aids					x												x
102-06-7	N,N'-diphenyl-guanidine	72.73	Catalyst, Crosslinking Agent, Filler, Initiator, Light Stabilizer, Other Processing Aids, Plasticizer				x	x	x				x		x			x			x
102-08-9	N,N'-diphenyl-thiourea	69.77	Antioxidant, Catalyst, Crosslinking Agent, Initiator, Light Stabilizer	x			x		x									x			x
5026-74-4	N-[4-(2-oxiranylmethoxy)phenyl]-N-(2-oxiranylmethyl)-2-oxiranemethanamine	97.05	Intermediates, Other Processing Aids					x			x
3030-47-5	N1-[2-(dimethylamino)ethyl]-N1,N2,N2-trimethyl-1,2-ethanediamine	86.57	Catalyst, Colorant, Crosslinking Agent, Filler, Initiator, Intermediates, Other Processing Aids		x			x	x		x				x			x			x
91-20-3	Naphthalene	35.66	Biocide, Catalyst, Colorant, Filler, Light Stabilizer, Lubricant, Odor Agent, Other Processing Aids, Solvent		x		x	x		x		x		x	x			x	x
3622-84-2	N-butyl-benzenesulfonamide	98.82	Filler, Other Processing Aids, Plasticizer					x					x		x
461-58-5	N-cyanoguanidine	73.3	Catalyst, Colorant, Crosslinking Agent, Filler, Initiator, Intermediates, Other Processing Aids		x			x	x		x				x			x			x
3710-84-7	N-ethyl-N-hydroxy-ethanamine	69.94	Light Stabilizer				x
98-95-3	Nitrobenzene	76.78	Other																					x
100-61-8	N-methyl-benzenamine	91.35	Colorant, Lubricant		x							x
56-23-5	Tetrachloromethane	5.66	Colorant, Other Processing Aids, Solvent		x			x						x
67-66-3	Trichloromethane	8.71	Colorant, Other Processing Aids		x			x
78-40-0	Triethyl ester phosphoric acid	66.58	Antioxidant, Colorant, Crosslinking Agent, Filler, Flame Retardant, Intermediates, Other Processing Aids, Plasticizer	x	x			x	x		x		x		x		x
			% of PMTs	8.87097	53.2258	0.806452	11.2903	59.6774	29.0323	10.4839	46.7742	22.5806	13.7097	8.06452	34.6774	6.45161	10.4839	20.9677	15.3226	16.129	17.7419	2.41935	0.806452	18.5484
			% of high emission PMTs	9.375	48.4375	1.5625	9.375	60.9375	29.6875	4.6875	42.1875	15.625	12.5	4.6875	32.8125	6.25	10.9375	21.875	15.625	15.625	20.3125	1.5625	0	20.3125
			% high emission PMTs of the function	54.5455	46.9697	100	42.8571	52.7027	52.7778	23.0769	46.5517	35.7143	47.0588	30	48.8372	50	53.8462	53.8462	52.6316	50	59.0909	33.3333	0	56.5217
					Contains Halogen?	Contains P?	Contains N?	Contains S?	Contains Si?
				% antioxidant	0	9.09091	45.4545	9.09091	9.09091
				% crosslinking agents	8.33333	2.77778	69.4444	16.6667	2.77778
				% flame retardants	53.8462	23.0769	15.3846	7.69231	0
				% initiators	4.54545	4.54545	77.2727	22.7273	0
				% light stabilizers,	14.2857	0	50	14.2857	0
				% viscosity modifiers	33.3333	33.3333	0	0	0

## Sheet: Table S6
Table S6: Spectral database of PMT plastic additives
				NORMAN Network Data
CAS	Name	Formula	Canonical SMILES (via Arp et al. 2017)	Monoisotopic Mass	[M+H]+	[M-H]-	Predicted Retention Index (+)	Predicted Retention Index (-)	Predicted ESI Mode	Preferrable Platform	MassBank Link	Comment
75-01-4	Chloroethene	C2H3Cl	ClC=C	61.9923	62.9996	60.9851	98.9	61.33	Positive ESI	GC-EI	N/A	MassBank data not found
76-05-1	2,2,2-trifluoro-acetic acid	C2HF3O2	OC(=O)C(F)(F)F	113.993	115	112.986	62.62	53.49	Negative ESI	RPLC_-ESI	https://massbank.eu/MassBank/Result.jsp?compound=Trifluoroacetic+acid&op1=and&mz=&tol=0.3&op2=and&formula=&type=quick&searchType=keyword&sortKey=not&sortAction=1&pageNo=1&exec=&inst=GC-EI-BE&inst=GC-EI-Q&inst=GC-EI-QQ&inst=GC-EI-TOF&inst_grp=ESI&inst=CE-ESI-TOF&inst=ESI-ITFT&inst=ESI-ITTOF&inst=ESI-QIT&inst=ESI-QTOF&inst=ESI-TOF&inst=LC-ESI-IT&inst=LC-ESI-ITFT&inst=LC-ESI-ITTOF&inst=LC-ESI-Q&inst…
79-01-6	1,1,2-trichloroethene	C2HCl3	ClC=C(Cl)Cl	129.914	130.922	128.907	192.15	238.2	Positive ESI	GC-EI	N/A	MassBank data not found
80-09-1	4,4'-sulfonylbis-phenol	C12H10O4S	Oc1ccc(cc1)S(=O)(=O)c1ccc(cc1)O	250.03	251.037	249.023	462.43	380.63	Negative ESI	RPLC_-ESI	https://massbank.eu/MassBank/Result.jsp?compound=Bisphenol+S&op1=and&mz=&tol=0.3&op2=and&formula=&type=quick&searchType=keyword&sortKey=not&sortAction=1&pageNo=1&exec=&inst=GC-EI-BE&inst=GC-EI-Q&inst=GC-EI-QQ&inst=GC-EI-TOF&inst_grp=ESI&inst=CE-ESI-TOF&inst=ESI-ITFT&inst=ESI-ITTOF&inst=ESI-QIT&inst=ESI-QTOF&inst=ESI-TOF&inst=LC-ESI-IT&inst=LC-ESI-ITFT&inst=LC-ESI-ITTOF&inst=LC-ESI-Q&inst=LC-ESI-Q…
81-07-2	1,2-benzisothiazol-3(2H)-one 1,1-dioxide	C7H5NO3S	O=C1NS(=O)(=O)c2c1cccc2	182.999	184.006	181.992	99.26	110.93	Both Polarities	GC-EI	https://massbank.eu/MassBank/Result.jsp?compound=Saccharin&op1=and&mz=&tol=0.3&op2=and&formula=&type=quick&searchType=keyword&sortKey=not&sortAction=1&pageNo=1&exec=&inst=GC-EI-BE&inst=GC-EI-Q&inst=GC-EI-QQ&inst=GC-EI-TOF&inst_grp=ESI&inst=CE-ESI-TOF&inst=ESI-ITFT&inst=ESI-ITTOF&inst=ESI-QIT&inst=ESI-QTOF&inst=ESI-TOF&inst=LC-ESI-IT&inst=LC-ESI-ITFT&inst=LC-ESI-ITTOF&inst=LC-ESI-Q&inst=LC-ESI-QFT…
81-11-8	2,2'-(1,2-ethenediyl)bis[5-amino-benzenesulfonic acid]	C14H14N2O6S2	Nc1ccc(c(c1)S(=O)(=O)O)C=Cc1ccc(cc1S(=O)(=O)O)N	370.029			277.059	194.618	Both Polarities	RPLC_-ESI	N/A	MassBank data not found
2554-06-5	2,4,6,8-tetraethenyl-2,4,6,8-tetramethyl-cyclotetrasiloxane	C12H24O4Si4	C=C[Si]1(C)O[Si](C)(C=C)O[Si](O[Si](O1)(C)C=C)(C)C=C	344.075	345.082	343.068	N/A	N/A	Positive ESI	GC-EI	N/A	MassBank data not found
2680-03-7	1,4-Diazabicyclo[2.2.2]octane	C5H9NO	C=CC(=O)N(C)C	99.0684	100.076	98.0611	209.92	192.6	Positive ESI	GC-EI	N/A	MassBank data not found
100-00-5	1-chloro-4-nitrobenzene	NO2C6H4Cl	Clc1ccc(cc1)N(=O)=O	156.993	158	155.986	512.74	365.59	Negative ESI	GC-EI	N/A	MassBank data not found
100-40-3	4-ethenyl-cyclohexene	C8H12	C=CC1CCC=CC1	108.094	109.101	107.087	510.78	526.41	Both Polarities	GC-EI	N/A	MassBank data not found
100-43-6	4-ethenyl-pyridine	C7H7N	C=Cc1ccncc1	105.058	106.065	104.051	171.12	232.35	Positive ESI	GC-EI	N/A	MassBank data not found
100-61-8	N-methyl-benzenamine	C7H9N	CNc1ccccc1	107.073	108.081	106.066	203.19	263.69	Positive ESI	GC-EI	https://massbank.eu/MassBank/Result.jsp?compound=N-Methylaniline&op1=and&mz=&tol=0.3&op2=and&formula=C7H9N&type=quick&searchType=keyword&sortKey=not&sortAction=1&pageNo=1&exec=&inst=GC-EI-BE&inst=GC-EI-Q&inst=GC-EI-QQ&inst=GC-EI-TOF&inst_grp=ESI&inst=CE-ESI-TOF&inst=ESI-ITFT&inst=ESI-ITTOF&inst=ESI-QIT&inst=ESI-QTOF&inst=ESI-TOF&inst=LC-ESI-IT&inst=LC-ESI-ITFT&inst=LC-ESI-ITTOF&inst=LC-ESI-Q&inst…
100-97-0	1,3,5,7-Tetraazatricyclo[3.3.1.13,7]decane	C6H12N4	C1N2CN3CN1CN(C2)C3	140.106	141.113	139.099	177.91	329.49	Positive ESI	RPLC_+ESI	https://massbank.eu/MassBank/Result.jsp?compound=Methenamine&op1=and&mz=&tol=0.3&op2=and&formula=C6H12N4&type=quick&searchType=keyword&sortKey=not&sortAction=1&pageNo=1&exec=&inst=GC-EI-BE&inst=GC-EI-Q&inst=GC-EI-QQ&inst=GC-EI-TOF&inst_grp=ESI&inst=CE-ESI-TOF&inst=ESI-ITFT&inst=ESI-ITTOF&inst=ESI-QIT&inst=ESI-QTOF&inst=ESI-TOF&inst=LC-ESI-IT&inst=LC-ESI-ITFT&inst=LC-ESI-ITTOF&inst=LC-ESI-Q&inst=L…
101-77-9	4,4'-methylenebis-benzenamine	C13H14N2	Nc1ccc(cc1)Cc1ccc(cc1)N	198.116	199.123	197.108	305.75	417.23	Positive ESI	GC-EI	N/A	MassBank data not found
102-06-7	N,N'-diphenyl-guanidine	C13H13N3	N=C(Nc1ccccc1)Nc1ccccc1	211.111	212.118	210.104	284.15	233.89	Both Polarities	GC-EI	https://massbank.eu/MassBank/Result.jsp?compound=1%2C3-Diphenylguanidine&op1=and&mz=&tol=0.3&op2=and&formula=&type=quick&searchType=keyword&sortKey=not&sortAction=1&pageNo=1&exec=&inst=GC-EI-BE&inst=GC-EI-Q&inst=GC-EI-QQ&inst=GC-EI-TOF&inst_grp=ESI&inst=CE-ESI-TOF&inst=ESI-ITFT&inst=ESI-ITTOF&inst=ESI-QIT&inst=ESI-QTOF&inst=ESI-TOF&inst=LC-ESI-IT&inst=LC-ESI-ITFT&inst=LC-ESI-ITTOF&inst=LC-ESI-Q&i…
102-08-9	N,N'-diphenyl-thiourea	C13H12N2S	S=C(Nc1ccccc1)Nc1ccccc1	228.072	229.079	227.065	571.3	388.7	Both Polarities	GC-EI	N/A	MassBank data not found
103-90-2	N-(4-hydroxyphenyl)-acetamide	C8H9NO2	CC(=O)Nc1ccc(cc1)O	151.063	152.071	150.056	237.01	221.27	Both Polarities	RPLC_+ESI	https://massbank.eu/MassBank/Result.jsp?compound=Acetaminophen+%2F+paracetamol&op1=and&mz=&tol=0.3&op2=and&formula=&type=quick&searchType=keyword&sortKey=not&sortAction=1&pageNo=1&exec=&inst=GC-EI-BE&inst=GC-EI-Q&inst=GC-EI-QQ&inst=GC-EI-TOF&inst_grp=ESI&inst=CE-ESI-TOF&inst=ESI-ITFT&inst=ESI-ITTOF&inst=ESI-QIT&inst=ESI-QTOF&inst=ESI-TOF&inst=LC-ESI-IT&inst=LC-ESI-ITFT&inst=LC-ESI-ITTOF&inst=LC-E…
106-93-4	1,2-dibromoethane	C2H4Br2	BrCCBr	185.868	186.875	184.861	365.43	190.83	Positive ESI	GC-EI	N/A	MassBank data not found
107-06-2	1,2-dichloroethane	C2H4Cl2	ClCCCl	97.969	98.9763	96.9617	394.07	174.98	Positive ESI	GC-EI	N/A	MassBank data not found
107-46-0	1,1,1,3,3,3-hexamethyl-disiloxane	C6H18OSi2	C[Si](O[Si](C)(C)C)(C)C	162.09	163.097	161.082	N/A	N/A	Positive ESI	GC-EI	N/A	MassBank data not found
107-66-4	Dibutyl ester phosphoric acid	C8H19O4P	CCCCOP(=O)(OCCCC)[O-]	210.102	211.109	209.095	379.33	336.4	Positive ESI	RPLC_+ESI	https://massbank.eu/MassBank/Result.jsp?compound=dibutyl+hydrogen+phosphate&op1=and&mz=&tol=0.3&op2=and&formula=&type=quick&searchType=keyword&sortKey=not&sortAction=1&pageNo=1&exec=&inst=GC-EI-BE&inst=GC-EI-Q&inst=GC-EI-QQ&inst=GC-EI-TOF&inst_grp=ESI&inst=CE-ESI-TOF&inst=ESI-ITFT&inst=ESI-ITTOF&inst=ESI-QIT&inst=ESI-QTOF&inst=ESI-TOF&inst=LC-ESI-IT&inst=LC-ESI-ITFT&inst=LC-ESI-ITTOF&inst=LC-ESI-…
108-20-3	2,2'-oxybis-propane	C6H14O	CC(OC(C)C)C	102.104	103.112	101.097	490.17	353.41	Negative ESI	GC-EI	N/A	MassBank data not found
108-42-9	3-chloro-benzenamine	C6H6ClN	Nc1cccc(c1)Cl	127.019	128.026	126.012	265.5	244.7	Positive ESI	RPLC_+ESI	N/A	MassBank data not found
108-67-8	1,3,5-trimethyl-benzene (Mesitylene)	C9H12	Cc1cc(C)cc(c1)C	120.094	121.101	119.087	633.12	430.84	Positive ESI	GC-EI	N/A	MassBank data not found
108-78-1	1,3,5-Triazine-2,4,6-triamine (Melamine)	C3H6N6	Nc1nc(N)nc(n1)N	126.065	127.073	125.058	-5.27	-35.8	Positive ESI	RPLC_+ESI	https://massbank.eu/MassBank/Result.jsp?compound=melamine&op1=and&mz=&tol=0.3&op2=and&formula=C3H6N6&type=quick&searchType=keyword&sortKey=not&sortAction=1&pageNo=1&exec=&inst=GC-EI-BE&inst=GC-EI-Q&inst=GC-EI-QQ&inst=GC-EI-TOF&inst_grp=ESI&inst=CE-ESI-TOF&inst=ESI-ITFT&inst=ESI-ITTOF&inst=ESI-QIT&inst=ESI-QTOF&inst=ESI-TOF&inst=LC-ESI-IT&inst=LC-ESI-ITFT&inst=LC-ESI-ITTOF&inst=LC-ESI-Q&inst=LC-ES…
108-80-5	1,3,5-Triazine-2,4,6(1H,3H,5H)-trione	C3H3N3O3	O=c1[nH]c(=O)[nH]c(=O)[nH]1	129.017	130.025	128.01	39.6	-21.66	Both Polarities	GC-EI	N/A	MassBank data not found
108-90-7	Chlorobenzene	C6H5Cl	Clc1ccccc1	112.008	113.015	111.001	309.47	275.84	Both Polarities	GC-EI	N/A	MassBank data not found
109-70-6	1-bromo-3-chloropropane	C3H6BrCl	ClCCCBr	155.934	156.941	154.927	423.22	240.81	Positive ESI	GC-EI	N/A	MassBank data not found
110553-27-0	2-methyl-4,6-bis[(octylthio)methyl]-phenol	C25H44OS2	CCCCCCCCSCc1cc(CSCCCCCCCCC)c(c(c1)C)O	424.283	425.291	423.276	838.77	466.48	Positive ESI	GC-EI	N/A	MassBank data not found
111-96-6	1,1'-oxybis[2-methoxy-ethane]	C6H14O3	COCCOCCOC	134.094	135.102	133.087	375.85	322.25	Positive ESI	GC-EI	https://massbank.eu/MassBank/Result.jsp?compound=Diethylene+glycol+dimethyl+ether&op1=and&mz=&tol=0.3&op2=and&formula=&type=quick&searchType=keyword&sortKey=not&sortAction=1&pageNo=1&exec=&inst=GC-EI-BE&inst=GC-EI-Q&inst=GC-EI-QQ&inst=GC-EI-TOF&inst_grp=ESI&inst=CE-ESI-TOF&inst=ESI-ITFT&inst=ESI-ITTOF&inst=ESI-QIT&inst=ESI-QTOF&inst=ESI-TOF&inst=LC-ESI-IT&inst=LC-ESI-ITFT&inst=LC-ESI-ITTOF&inst=L…
115-10-6	1,1'-oxybis-methane	C2H6O	COC	46.0419	47.0491	45.0346	371.69	75.01	Negative ESI	GC-EI	N/A	MassBank data not found
115-96-8	2-Chloro-, 1,1',1''-phosphate ethanol	C6H12Cl3O4P	ClCCOP(=O)(OCCCl)OCCCl	283.954	284.961	282.947	584.21	724.4	Both Polarities	GC-EI	https://massbank.eu/MassBank/Result.jsp?compound=Tris%282-chloroethyl%29phosphate&op1=and&mz=&tol=0.3&op2=and&formula=&type=quick&searchType=keyword&sortKey=not&sortAction=1&pageNo=1&exec=&inst=GC-EI-BE&inst=GC-EI-Q&inst=GC-EI-QQ&inst=GC-EI-TOF&inst_grp=ESI&inst=CE-ESI-TOF&inst=ESI-ITFT&inst=ESI-ITTOF&inst=ESI-QIT&inst=ESI-QTOF&inst=ESI-TOF&inst=LC-ESI-IT&inst=LC-ESI-ITFT&inst=LC-ESI-ITTOF&inst=L…
118-79-6	2,4,6-tribromophenol	C6H3Br3O	Brc1cc(Br)c(c(c1)Br)O	327.773	328.781	326.766	633.9	695.88	Negative ESI	RPLC_-ESI	https://massbank.eu/MassBank/Result.jsp?inchikey=BSWWXRFVMJHFBN-UHFFFAOYSA-N&type=inchikey&searchType=inchikey&sortKey=not&sortAction=1&pageNo=1&exec=&inst=GC-EI-BE&inst=GC-EI-Q&inst=GC-EI-QQ&inst=GC-EI-TOF&inst_grp=ESI&inst=CE-ESI-TOF&inst=ESI-ITFT&inst=ESI-ITTOF&inst=ESI-QIT&inst=ESI-QQ&inst=ESI-QTOF&inst=ESI-TOF&inst=LC-ESI-IT&inst=LC-ESI-ITFT&inst=LC-ESI-ITTOF&inst=LC-ESI-Q&inst=LC-ESI-QFT&in…
119-61-9	Diphenyl-methanone	C13H10O	O=C(c1ccccc1)c1ccccc1	182.073	183.08	181.066	625.06	473.84	Positive ESI	GC-EI	https://massbank.eu/MassBank/Result.jsp?compound=Benzophenone&op1=and&mz=&tol=0.3&op2=and&formula=C13H10O&type=quick&searchType=keyword&sortKey=not&sortAction=1&pageNo=1&exec=&inst=GC-EI-BE&inst=GC-EI-Q&inst=GC-EI-QQ&inst=GC-EI-TOF&inst_grp=ESI&inst=CE-ESI-TOF&inst=ESI-ITFT&inst=ESI-ITTOF&inst=ESI-QIT&inst=ESI-QTOF&inst=ESI-TOF&inst=LC-ESI-IT&inst=LC-ESI-ITFT&inst=LC-ESI-ITTOF&inst=LC-ESI-Q&inst=…
119-64-2	1,2,3,4-tetrahydro-naphthalene	C10H12	C1CCc2c(C1)cccc2	132.094	133.101	131.087	579.59	546.76	Positive ESI	GC-EI	N/A	MassBank data not found
119-65-3	Isoquinoline	C9H7N	c1ccc2c(c1)cncc2	129.058	130.065	128.051	212.93	264.15	Positive ESI	RPLC_+ESI	https://massbank.eu/MassBank/Result.jsp?compound=Isoquinoline&op1=and&mz=&tol=0.3&op2=and&formula=C9H7N&type=quick&searchType=keyword&sortKey=not&sortAction=1&pageNo=1&exec=&inst=GC-EI-BE&inst=GC-EI-Q&inst=GC-EI-QQ&inst=GC-EI-TOF&inst_grp=ESI&inst=CE-ESI-TOF&inst=ESI-ITFT&inst=ESI-ITTOF&inst=ESI-QIT&inst=ESI-QTOF&inst=ESI-TOF&inst=LC-ESI-IT&inst=LC-ESI-ITFT&inst=LC-ESI-ITTOF&inst=LC-ESI-Q&inst=LC…
120-12-7	Anthracene	C14H10	c1ccc2c(c1)cc1c(c2)cccc1	178.078	179.086	177.071	704.7	551.67	Positive ESI	GC-EI	N/A	MassBank data not found
120-82-1	1,2,4-trichlorobenzene	C6H3Cl3	Clc1ccc(c(c1)Cl)Cl	179.93	180.937	178.923	579.58	534.29	Both Polarities	GC-EI	N/A	MassBank data not found
120-83-2	2,4-dichlorophenol	C6H4Cl2O	Clc1ccc(c(c1)Cl)O	161.964	162.971	160.957	465.38	392.56	Both Polarities	GC-EI	https://massbank.eu/MassBank/Result.jsp?compound=2%2C4-dichlorophenol&op1=and&mz=&tol=0.3&op2=and&formula=&type=quick&searchType=keyword&sortKey=not&sortAction=1&pageNo=1&exec=&inst=GC-EI-BE&inst=GC-EI-Q&inst=GC-EI-QQ&inst=GC-EI-TOF&inst_grp=ESI&inst=CE-ESI-TOF&inst=ESI-ITFT&inst=ESI-ITTOF&inst=ESI-QIT&inst=ESI-QTOF&inst=ESI-TOF&inst=LC-ESI-IT&inst=LC-ESI-ITFT&inst=LC-ESI-ITTOF&inst=LC-ESI-Q&inst…
121-57-3	4-amino-benzenesulfonic acid	C6H7NO3S	Nc1ccc(cc1)S(=O)(=O)O	173.015	174.022	172.007	119.3	128.18	Both Polarities	GC-EI	https://massbank.eu/MassBank/Result.jsp?compound=4-Aminobenzenesulfonic+acid&op1=and&mz=&tol=0.3&op2=and&formula=&type=quick&searchType=keyword&sortKey=not&sortAction=1&pageNo=1&exec=&inst=GC-EI-BE&inst=GC-EI-Q&inst=GC-EI-QQ&inst=GC-EI-TOF&inst_grp=ESI&inst=CE-ESI-TOF&inst=ESI-ITFT&inst=ESI-ITTOF&inst=ESI-QIT&inst=ESI-QTOF&inst=ESI-TOF&inst=LC-ESI-IT&inst=LC-ESI-ITFT&inst=LC-ESI-ITTOF&inst=LC-ESI…
123-30-8	4-aminophenol	C6H7NO	Nc1ccc(cc1)O	109.053	110.06	108.045	68.62	165.62	Both Polarities	GC-EI	https://massbank.eu/MassBank/Result.jsp?compound=4-Aminophenol&op1=and&mz=&tol=0.3&op2=and&formula=C6H7NO&type=quick&searchType=keyword&sortKey=not&sortAction=1&pageNo=1&exec=&inst=GC-EI-BE&inst=GC-EI-Q&inst=GC-EI-QQ&inst=GC-EI-TOF&inst_grp=ESI&inst=CE-ESI-TOF&inst=ESI-ITFT&inst=ESI-ITTOF&inst=ESI-QIT&inst=ESI-QTOF&inst=ESI-TOF&inst=LC-ESI-IT&inst=LC-ESI-ITFT&inst=LC-ESI-ITTOF&inst=LC-ESI-Q&inst=…
123-91-1	1,4-dioxane	C4H8O2	O1CCOCC1	88.0524	89.0597	87.0452	288.68	160.96	Negative ESI	GC-EI	N/A	MassBank data not found
126-86-3	2,4,7,9-tetramethyl-5-decyne-4,7-diol	C14H26O2	CC(CC(C#CC(CC(C)C)(O)C)(O)C)C	226.193	227.201	225.186	713.69	642.21	Negative ESI	GC-EI	N/A	MassBank data not found
127-18-4	1,1,2,2-tetrachloroethene	C2Cl4	ClC(=C(Cl)Cl)Cl	163.875	164.883	162.868	184.31	580.31	Positive ESI	GC-EI	N/A	MassBank data not found
131-57-7	(2-hydroxy-4-methoxyphenyl)phenyl-methanone	C14H12O3	COc1ccc(c(c1)O)C(=O)c1ccccc1	228.079	229.086	227.071	622.57	562.04	Both Polarities	GC-EI	https://massbank.eu/MassBank/Result.jsp?compound=2-Hydroxy-4-methoxybenzophenone&op1=and&mz=&tol=0.3&op2=and&formula=&type=quick&searchType=keyword&sortKey=not&sortAction=1&pageNo=1&exec=&inst=GC-EI-BE&inst=GC-EI-Q&inst=GC-EI-QQ&inst=GC-EI-TOF&inst_grp=ESI&inst=CE-ESI-TOF&inst=ESI-ITFT&inst=ESI-ITTOF&inst=ESI-QIT&inst=ESI-QTOF&inst=ESI-TOF&inst=LC-ESI-IT&inst=LC-ESI-ITFT&inst=LC-ESI-ITTOF&inst=LC…
13472-08-7	2,2'-(1,2-diazenediyl)bis[2-methyl-butanenitrile]	C10H16N4	CCC(N=NC(C#N)(CC)C)(C#N)C	192.137	193.145	191.13	618.24	492.74	Positive ESI	GC-EI	N/A	MassBank data not found
13674-84-5	1-Chloro-, 2,2',2''-phosphate 2-propanol	C9H18Cl3O4P	ClCC(OP(=O)(OC(CCl)C)OC(CCl)C)C	326.001	327.008	324.994	793.64	814.29	Both Polarities	GC-EI	https://massbank.eu/MassBank/Result.jsp?inchikey=KVMPUXDNESXNOH-UHFFFAOYSA-N&type=inchikey&searchType=inchikey&sortKey=not&sortAction=1&pageNo=1&exec=&inst=GC-EI-BE&inst=GC-EI-Q&inst=GC-EI-QQ&inst=GC-EI-TOF&inst_grp=ESI&inst=CE-ESI-TOF&inst=ESI-ITFT&inst=ESI-ITTOF&inst=ESI-QIT&inst=ESI-QTOF&inst=ESI-TOF&inst=LC-ESI-IT&inst=LC-ESI-ITFT&inst=LC-ESI-ITTOF&inst=LC-ESI-Q&inst=LC-ESI-QFT&inst=LC-ESI-QI…
13674-87-8	1,3-Dichloro-, 2,2',2''-phosphate 2-propanol	C9H15Cl6O4P	ClCC(OP(=O)(OC(CCl)CCl)OC(CCl)CCl)CCl	427.884	428.891	426.877	840.96	879.48	Both Polarities	GC-EI	https://massbank.eu/MassBank/Result.jsp?compound=tris%281%2C3-dichloropropan-2-yl%29+phosphate&op1=and&mz=&tol=0.3&op2=and&formula=&type=quick&searchType=keyword&sortKey=not&sortAction=1&pageNo=1&exec=&inst=GC-EI-BE&inst=GC-EI-Q&inst=GC-EI-QQ&inst=GC-EI-TOF&inst_grp=ESI&inst=CE-ESI-TOF&inst=ESI-ITFT&inst=ESI-ITTOF&inst=ESI-QIT&inst=ESI-QTOF&inst=ESI-TOF&inst=LC-ESI-IT&inst=LC-ESI-ITFT&inst=LC-ESI…
13676-54-5	1,1'-(methylenedi-4,1-phenylene)bis-1H-Pyrrole-2,5-dione	C21H14N2O4	O=C1C=CC(=O)N1c1ccc(cc1)Cc1ccc(cc1)N1C(=O)C=CC1=O	358.095	359.103	357.088	495.83	549.83	Positive ESI	GC-EI	N/A	MassBank data not found
1493-13-6	1,1,1-trifluoro-methanesulfonic acid	CHF3O3S	FC(S(=O)(=O)O)(F)F	149.96	150.967	148.953	171.12	76.46	Negative ESI	RPLC_-ESI	https://massbank.eu/MassBank/Result.jsp?compound=Trifluoromethanesulfonic+acid&op1=and&mz=&tol=0.3&op2=and&formula=&type=quick&searchType=keyword&sortKey=not&sortAction=1&pageNo=1&exec=&inst=GC-EI-BE&inst=GC-EI-Q&inst=GC-EI-QQ&inst=GC-EI-TOF&inst_grp=ESI&inst=CE-ESI-TOF&inst=ESI-ITFT&inst=ESI-ITTOF&inst=ESI-QIT&inst=ESI-QTOF&inst=ESI-TOF&inst=LC-ESI-IT&inst=LC-ESI-ITFT&inst=LC-ESI-ITTOF&inst=LC-E…
15214-89-8	2-methyl-2-[(1-oxo-2-propen-1-yl)amino]-1-propanesulfonic acid	C7H13NO4S	C=CC(=NC(CS(=O)(=O)O)(C)C)O	207.057			N/A	N/A	N/A	N/A	N/A	MassBank data not found
156-60-5	(1E)-1,2-dichloroethene	C2H2Cl2		95.9534	96.9606	94.9461	108.49	105.87	Positive ESI	GC-EI	N/A	MassBank data not found
162881-26-7	1,1'-(phenylphosphinylidene)bis[1-(2,4,6-trimethylphenyl)-methanone	C26H27O3P	Cc1cc(C)c(c(c1)C)C(=O)P(=O)(C(=O)c1c(C)cc(cc1C)C)c1ccccc1	418.17	419.177	417.163	939.1	849.6	Positive ESI	GC-EI	N/A	MassBank data not found
1634-04-4	2-methoxy-2-methyl-propane	C5H12O	COC(C)(C)C	88.0888	89.0961	87.0815	330.45	333.72	Negative ESI	GC-EI	N/A	MassBank data not found
1761-71-3	4,4'-methylenebis(cyclohexylamine)	C13H26N2	NC1CCC(CC1)CC1CCC(CC1)N	210.21	211.217	209.202	137.51	184.31	Positive ESI	RPLC_+ESI	N/A	MassBank data not found
1912-24-9	6-chloro-N2-ethyl-N4-(1-methylethyl)-1,3,5-triazine-2,4-diamine	C8H14ClN5	CCNc1nc(NC(C)C)nc(n1)Cl	215.094	216.101	214.086	533.16	496.95	Positive ESI	GC-EI	https://massbank.eu/MassBank/Result.jsp?compound=&op1=and&mz=&tol=0.3&op2=and&formula=C8H14ClN5&type=quick&searchType=keyword&sortKey=not&sortAction=1&pageNo=1&exec=&inst=GC-EI-BE&inst=GC-EI-Q&inst=GC-EI-QQ&inst=GC-EI-TOF&inst_grp=ESI&inst=CE-ESI-TOF&inst=ESI-ITFT&inst=ESI-ITTOF&inst=ESI-QIT&inst=ESI-QTOF&inst=ESI-TOF&inst=LC-ESI-IT&inst=LC-ESI-ITFT&inst=LC-ESI-ITTOF&inst=LC-ESI-Q&inst=LC-ESI-QFT…
22094-93-5	2,2'-[(2,2',5,5'-tetrachloro[1,1'-biphenyl]-4,4'-diyl)bis(2,1-diazenediyl)]bis[N-(2,4-dimethylphenyl)-3-oxo-butanamide]	C36H32Cl4N6O4	Cc1ccc(c(c1)C)NC(=O)C(C(=O)C)N=Nc1cc(Cl)c(cc1Cl)c1cc(Cl)c(cc1Cl)N=NC(C(=O)Nc1ccc(cc1C)C)C(=O)C	752.124	753.131	751.117	616.68	727.13	Positive ESI	RPLC_+ESI	N/A	MassBank data not found
2440-22-4	2-(2H-benzotriazol-2-yl)-4-methyl-phenol	C13H11N3O	Cc1ccc(c(c1)n1nc2c(n1)cccc2)O	225.09	226.097	224.083	568.08	552.84	Positive ESI	RPLC_+ESI	N/A	MassBank data not found
284-95-7, 2680-03-7	N,N-dimethyl-2-propenamide	C6H12N2	C1CCCC(CCC1)N1CCCCNCC1	112.1	113.107	111.093	39.45	89.21	Positive ESI	GC-EI	N/A	MassBank data not found
2855-13-2	5-amino-1,3,3-trimethyl-cyclohexanemethanamine	C10H22N2	NCC1(C)CC(N)CC(C1)(C)C	170.178	171.186	169.171	92.69	140.57	Positive ESI	RPLC_+ESI	https://massbank.eu/MassBank/Result.jsp?compound=Isophorone+diamine&op1=and&mz=&tol=0.3&op2=and&formula=&type=quick&searchType=keyword&sortKey=not&sortAction=1&pageNo=1&exec=&inst=GC-EI-BE&inst=GC-EI-Q&inst=GC-EI-QQ&inst=GC-EI-TOF&inst_grp=ESI&inst=CE-ESI-TOF&inst=ESI-ITFT&inst=ESI-ITTOF&inst=ESI-QIT&inst=ESI-QTOF&inst=ESI-TOF&inst=LC-ESI-IT&inst=LC-ESI-ITFT&inst=LC-ESI-ITTOF&inst=LC-ESI-Q&inst=L…
3006-86-8	1,1'-cyclohexylidenebis[2-(1,1-dimethylethyl)peroxide]	C14H28O4	CC(OOC1(CCCCC1)OOC(C)(C)C)(C)C	260.199	261.206	259.191	800.5	637	Positive ESI	GC-EI	N/A	MassBank data not found
3030-47-5	N1-[2-(dimethylamino)ethyl]-N1,N2,N2-trimethyl-1,2-ethanediamine	C9H23N3	CN(CCN(C)C)CCN(C)C	173.189	174.196	172.182	148.04	84.77	Positive ESI	GC-EI	N/A	MassBank data not found
3033-62-3	2,2'-oxybis[N,N-dimethyl-ethanamine]	C8H20N2O	CN(CCOCCN(C)C)C	160.158	161.165	159.15	90.65	89.27	Positive ESI	GC-EI	N/A	MassBank data not found
330-54-1	N'-(3,4-dichlorophenyl)-N,N-dimethyl-urea	C9H10Cl2N2O	O=C(N(C)C)Nc1ccc(c(c1)Cl)Cl	232.017	233.024	231.01	525.85	574.55	Both Polarities	GC-EI	https://massbank.eu/MassBank/Result.jsp?compound=Diuron&op1=and&mz=&tol=0.3&op2=and&formula=C9H10Cl2N2O&type=quick&searchType=keyword&sortKey=not&sortAction=1&pageNo=1&exec=&inst=GC-EI-BE&inst=GC-EI-Q&inst=GC-EI-QQ&inst=GC-EI-TOF&inst_grp=ESI&inst=CE-ESI-TOF&inst=ESI-ITFT&inst=ESI-ITTOF&inst=ESI-QIT&inst=ESI-QTOF&inst=ESI-TOF&inst=LC-ESI-IT&inst=LC-ESI-ITFT&inst=LC-ESI-ITTOF&inst=LC-ESI-Q&inst=LC…
3380-34-5	5-chloro-2-(2,4-dichlorophenoxy)-phenol	C12H7Cl3O2	Clc1ccc(c(c1)O)Oc1ccc(cc1Cl)Cl	287.951	288.958	286.944	827.25	744.35	Negative ESI	RPLC_-ESI	https://massbank.eu/MassBank/Result.jsp?compound=Triclosan&op1=and&mz=&tol=0.3&op2=and&formula=&type=quick&searchType=keyword&sortKey=not&sortAction=1&pageNo=1&exec=&inst_grp=ESI&inst=CE-ESI-TOF&inst=ESI-ITFT&inst=ESI-ITTOF&inst=ESI-QIT&inst=ESI-QTOF&inst=ESI-TOF&inst=LC-ESI-IT&inst=LC-ESI-ITFT&inst=LC-ESI-ITTOF&inst=LC-ESI-Q&inst=LC-ESI-QFT&inst=LC-ESI-QIT&inst=LC-ESI-QQ&inst=LC-ESI-QQQ&inst=LC-…
3622-84-2	N-butyl-benzenesulfonamide	C10H15NO2S	CCCCNS(=O)(=O)c1ccccc1	213.082	214.09	212.075	464.9	390.06	Both Polarities	RPLC_+ESI	https://massbank.eu/MassBank/Result.jsp?compound=N-Butylbenzenesulphonamide&op1=and&mz=&tol=0.3&op2=and&formula=&type=quick&searchType=keyword&sortKey=not&sortAction=1&pageNo=1&exec=&inst=GC-EI-BE&inst=GC-EI-Q&inst=GC-EI-QQ&inst=GC-EI-TOF&inst_grp=ESI&inst=CE-ESI-TOF&inst=ESI-ITFT&inst=ESI-ITTOF&inst=ESI-QIT&inst=ESI-QTOF&inst=ESI-TOF&inst=LC-ESI-IT&inst=LC-ESI-ITFT&inst=LC-ESI-ITTOF&inst=LC-ESI-…
36888-99-0	5,5'-(1H-isoindole-1,3(2H)-diylidene)bis-2,4,6(1H,3H,5H)-pyrimidinetrione	C16H9N5O6	O=C1NC(=O)C(=c2[nH]c(=C3C(=O)NC(=O)NC3=O)c3c2cccc3)C(=O)N1	367.055	368.063	366.048	167.27	193.03	Positive ESI	RPLC_+ESI	N/A	MassBank data not found
3710-84-7	N-ethyl-N-hydroxy-ethanamine	C4H11NO	CCN(CC)O	89.0841	90.0913	88.0768	294.97	208.2	Positive ESI	GC-EI	N/A	MassBank data not found
461-58-5	N-cyanoguanidine	C2H4N4	NC(=N)NC#N	84.0436	85.0509	83.0363	-28.74	-21.21	Both Polarities	GC-EI	N/A	MassBank data not found
479-27-6	1,8-Naphthalenediamine	C10H10N2	Nc1cccc2c1c(N)ccc2	158.084	159.092	157.077	191	287.29	Positive ESI	RPLC_+ESI	N/A	MassBank data not found
482-89-3	2-(1,3-dihydro-3-oxo-2H-indol-2-ylidene)-1,2-dihydro-3H-indol-3-one	C16H10N2O2	O=C1c2ccccc2NC1=C1Nc2c(C1=O)cccc2	262.074	263.082	261.067	485.2	371.76	Positive ESI	RPLC_+ESI	N/A	MassBank data not found
5026-74-4	N-[4-(2-oxiranylmethoxy)phenyl]-N-(2-oxiranylmethyl)-2-oxiranemethanamine	C15H19NO4	C1OC1COc1ccc(cc1)N(CC1CO1)CC1CO1	277.131	278.139	276.124	497.78	625.89	Positive ESI	RPLC_+ESI	N/A	MassBank data not found
541-73-1	1,3-dichlorobenzene	C6H4Cl2	Clc1cccc(c1)Cl	145.969	146.976	144.962	564.64	365.03	Both Polarities	GC-EI	N/A	MassBank data not found
5468-75-7	2,2'-[(3,3'-dichloro[1,1'-biphenyl]-4,4'-diyl)bis(2,1-diazenediyl)]bis[N-(2-methylphenyl)-3-oxo-butanamide]	C34H30Cl2N6O4	CC(=O)C(C(=O)Nc1ccccc1C)N=Nc1ccc(cc1Cl)c1ccc(c(c1)Cl)N=NC(C(=O)Nc1ccccc1C)C(=O)C	656.171	657.178	655.163	671.8	781.46	Positive ESI	RPLC_+ESI	N/A	MassBank data not found
5567-15-7	2,2'-[(3,3'-dichloro[1,1'-biphenyl]-4,4'-diyl)bis(2,1-diazenediyl)]bis[N-(4-chloro-2,5-dimethoxyphenyl)-3-oxo-butanamide]	C36H32Cl4N6O8	COc1cc(Cl)c(cc1NC(=O)C(C(=O)C)N=Nc1ccc(cc1Cl)c1ccc(c(c1)Cl)N=NC(C(=O)Nc1cc(OC)c(cc1OC)Cl)C(=O)C)OC	816.104	817.111	815.096	805.54	803.65	Positive ESI	RPLC_+ESI	N/A	MassBank data not found
56-23-5	Tetrachloromethane	CCl4	ClC(Cl)(Cl)Cl	151.875	152.883	150.868	447.4	591.75	Positive ESI	GC-EI	N/A	MassBank data not found
57-41-0	5,5-diphenyl-2,4-imidazolidinedione	C15H12N2O2		252.09	253.097	251.083	436.34	422.38	Both Polarities	GC-EI	https://massbank.eu/MassBank/Result.jsp?compound=Phenytoin&op1=and&mz=&tol=0.3&op2=and&formula=&type=quick&searchType=keyword&sortKey=not&sortAction=1&pageNo=1&exec=&inst=GC-EI-BE&inst=GC-EI-Q&inst=GC-EI-QQ&inst=GC-EI-TOF&inst_grp=ESI&inst=CE-ESI-TOF&inst=ESI-ITFT&inst=ESI-ITTOF&inst=ESI-QIT&inst=ESI-QTOF&inst=ESI-TOF&inst=LC-ESI-IT&inst=LC-ESI-ITFT&inst=LC-ESI-ITTOF&inst=LC-ESI-Q&inst=LC-ESI-QFT…
584-84-9	2,4-diisocyanato-1-methyl-benzene	C9H6N2O2	O=C=Nc1ccc(c(c1)N=C=O)C	174.043	175.05	173.036	451.56	325.54	Positive ESI	GC-EI	https://massbank.eu/MassBank/Result.jsp?inchikey=DVKJHBMWWAPEIU-UHFFFAOYSA-N&type=inchikey&searchType=inchikey&sortKey=not&sortAction=1&pageNo=1&exec=&inst=GC-EI-BE&inst=GC-EI-Q&inst=GC-EI-QQ&inst=GC-EI-TOF&inst_grp=ESI&inst=CE-ESI-TOF&inst=ESI-ITFT&inst=ESI-ITTOF&inst=ESI-QIT&inst=ESI-QQ&inst=ESI-QTOF&inst=ESI-TOF&inst=LC-ESI-IT&inst=LC-ESI-ITFT&inst=LC-ESI-ITTOF&inst=LC-ESI-Q&inst=LC-ESI-QFT&in…
60-00-4	N,N'-1,2-ethanediylbis[N-(carboxymethyl)-glycine	C10H16N2O8	OC(=O)CN(CC(=O)O)CCN(CC(=O)O)CC(=O)O	292.091	293.098	291.083	-23.19	32.51	Both Polarities	GC-EI	https://massbank.eu/MassBank/Result.jsp?compound=EDTA&op1=and&mz=&tol=0.3&op2=and&formula=&type=quick&searchType=keyword&sortKey=not&sortAction=1&pageNo=1&exec=&inst=GC-EI-BE&inst=GC-EI-Q&inst=GC-EI-QQ&inst=GC-EI-TOF&inst_grp=ESI&inst=CE-ESI-TOF&inst=ESI-ITFT&inst=ESI-ITTOF&inst=ESI-QIT&inst=ESI-QTOF&inst=ESI-TOF&inst=LC-ESI-IT&inst=LC-ESI-ITFT&inst=LC-ESI-ITTOF&inst=LC-ESI-Q&inst=LC-ESI-QFT&inst…
6358-37-8	2,2'-[(3,3'-dichloro[1,1'-biphenyl]-4,4'-diyl)bis(2,1-diazenediyl)]bis[N-(4-methylphenyl)-3-oxo-butanamide]	C34H30Cl2N6O4	Cc1ccc(cc1)NC(=O)C(C(=O)C)N=Nc1ccc(cc1Cl)c1ccc(c(c1)Cl)N=NC(C(=O)Nc1ccc(cc1)C)C(=O)C	656.171	657.178	655.163	664.17	780.57	Positive ESI	RPLC_+ESI	N/A	MassBank data not found
6674-22-2	2,3,4,6,7,8,9,10-octahydro-pyrimido[1,2-a]azepine	C9H16N2	C1CCN2C(=NCCC2)CC1	152.131	153.139	151.124	192.26	138.49	Positive ESI	GC-EI	N/A	MassBank data not found
67-43-6	N,N-bis[2-[bis(carboxymethyl)amino]ethyl]-glycine	C14H23N3O10	OC(=O)CN(CCN(CC(=O)O)CC(=O)O)CCN(CC(=O)O)CC(=O)O	393.138	394.146	392.131	-17.18	18.78	Both Polarities	GC-EI	N/A	MassBank data not found
67-66-3	Trichloromethane	CHCl3	ClC(Cl)Cl	117.914	118.922	116.907	344.29	140.85	Both Polarities	GC-EI	N/A	MassBank data not found
67-68-5	1,1'-sulfinylbis-methane	C2H6OS	CS(=O)C	78.0139	79.0212	77.0067	188.11	43.78	Positive ESI	GC-EI	N/A	MassBank data not found
68-22-4	(17α)-hydroxy-19-norpregn-4-en-20-yn-3-one	C20H26O2	C#C[C@]1(O)CC[C@@H]2[C@]1(C)CC[C@H]1[C@H]2CCC2=CC(=O)CC[C@H]12	298.193	299.201	297.186	688.2	694.29	Both Polarities	RPLC_+ESI	https://massbank.eu/MassBank/Result.jsp?compound=Norethisterone&op1=and&mz=&tol=0.3&op2=and&formula=&type=quick&searchType=keyword&sortKey=not&sortAction=1&pageNo=1&exec=&inst=GC-EI-BE&inst=GC-EI-Q&inst=GC-EI-QQ&inst=GC-EI-TOF&inst_grp=ESI&inst=CE-ESI-TOF&inst=ESI-ITFT&inst=ESI-ITTOF&inst=ESI-QIT&inst=ESI-QTOF&inst=ESI-TOF&inst=LC-ESI-IT&inst=LC-ESI-ITFT&inst=LC-ESI-ITTOF&inst=LC-ESI-Q&inst=LC-ES…
6864-37-5	4,4'-methylenebis[2-methyl-cyclohexanamine]	C15H30N2	NC1CCC(CC1C)CC1CCC(C(C1)C)N	238.241	239.248	237.234	254.64	225.52	Positive ESI	RPLC_+ESI	N/A	MassBank data not found
71-55-6	1,1,1-trichloroethane	C2H3Cl3	CC(Cl)(Cl)Cl	131.93	132.937	130.923	386.68	401.17	Positive ESI	GC-EI	N/A	MassBank data not found
71868-10-5	2-methyl-1-[4-(methylthio)phenyl]-2-(4-morpholinyl)-1-propanone	C15H21NO2S	CSc1ccc(cc1)C(=O)C(N1CCOCC1)(C)C	279.129	280.137	278.122	392.61	550.46	Positive ESI	RPLC_+ESI	https://massbank.eu/MassBank/Result.jsp?compound=2-Methyl-4%27-%28methylthio%29-2-morpholinopropiophenone&op1=and&mz=&tol=0.3&op2=and&formula=&type=quick&searchType=keyword&sortKey=not&sortAction=1&pageNo=1&exec=&inst=GC-EI-BE&inst=GC-EI-Q&inst=GC-EI-QQ&inst=GC-EI-TOF&inst_grp=ESI&inst=CE-ESI-TOF&inst=ESI-ITFT&inst=ESI-ITTOF&inst=ESI-QIT&inst=ESI-QTOF&inst=ESI-TOF&inst=LC-ESI-IT&inst=LC-ESI-ITFT&…
74-87-3	Chloromethane	CH3Cl	CCl	49.9923	50.9996	48.9851	303.82	81.18	Positive ESI	GC-EI	N/A	MassBank data not found
75-00-3	Chloroethane	C2H5Cl	CCCl	64.008	65.0153	63.0007	325.12	84.19	Positive ESI	GC-EI	N/A	MassBank data not found
75-35-4	1,1-dichloroethylene	C2H2Cl2	ClC(=C)Cl	95.9534	96.9606	94.9461	112.13	71.82	Positive ESI	GC-EI	N/A	MassBank data not found
75-71-8	Dichlorodifluoromethane	CCl2F2	FC(Cl)(Cl)F	119.935	120.942	118.927	358.01	260.46	Negative ESI	GC-EI	N/A	MassBank data not found
75-77-4	Chlorotrimethylsilane	C3H9SiCl	C[Si](Cl)(C)C	108.016	109.023	107.009	N/A	N/A	Positive ESI	GC-EI	N/A	MassBank data not found
77-73-6	3a,4,7,7a-tetrahydro-4,7-methano-1H-indene	C10H12	C1=CC2C(C1)C1C=CC2C1	132.094	133.101	131.087	471.34	477.22	Positive ESI	GC-EI	N/A	MassBank data not found
78-40-0	Triethyl ester phosphoric acid	C6H15O4P	CCOP(=O)(OCC)OCC	182.071	183.078	181.064	367.4	445.21	Positive ESI	RPLC_+ESI	https://massbank.eu/MassBank/Result.jsp?compound=Triethyl+phosphate&op1=and&mz=&tol=0.3&op2=and&formula=&type=quick&searchType=keyword&sortKey=not&sortAction=1&pageNo=1&exec=&inst=GC-EI-BE&inst=GC-EI-Q&inst=GC-EI-QQ&inst=GC-EI-TOF&inst_grp=ESI&inst=CE-ESI-TOF&inst=ESI-ITFT&inst=ESI-ITTOF&inst=ESI-QIT&inst=ESI-QTOF&inst=ESI-TOF&inst=LC-ESI-IT&inst=LC-ESI-ITFT&inst=LC-ESI-ITTOF&inst=LC-ESI-Q&inst=L…
78-51-3	2-butoxy-, 1,1',1''-phosphate ethanol	C18H39O7P	CCCCOCCOP(=O)(OCCOCCCC)OCCOCCCC	398.243	399.251	397.236	815.31	802.21	Positive ESI	RPLC_+ESI	https://massbank.eu/MassBank/Result.jsp?compound=Tris%282-butoxyethyl%29+phosphate&op1=and&mz=&tol=0.3&op2=and&formula=&type=quick&searchType=keyword&sortKey=not&sortAction=1&pageNo=1&exec=&inst=GC-EI-BE&inst=GC-EI-Q&inst=GC-EI-QQ&inst=GC-EI-TOF&inst_grp=ESI&inst=CE-ESI-TOF&inst=ESI-ITFT&inst=ESI-ITTOF&inst=ESI-QIT&inst=ESI-QTOF&inst=ESI-TOF&inst=LC-ESI-IT&inst=LC-ESI-ITFT&inst=LC-ESI-ITTOF&inst=…
78-67-1	2,2'-(1,2-diazenediyl)bis[2-methyl-propanenitrile]	C8H12N4	N#CC(N=NC(C#N)(C)C)(C)C	164.106	165.113	163.099	322.63	261.56	Positive ESI	GC-EI	N/A	MassBank data not found
78-87-5	1,2-dichloropropane	C3H6Cl2	ClCC(Cl)C	111.985	112.992	110.977	406.35	258.83	Positive ESI	GC-EI	N/A	MassBank data not found
79-00-5	1,1,2-trichloroethane	C2H3Cl3	ClCC(Cl)Cl	131.93	132.937	130.923	480.89	271.98	Positive ESI	GC-EI	N/A	MassBank data not found
79-46-9	2-nitropropane	C3H7NO2	CC(N(=O)=O)C	89.0477	90.055	88.0404	287.14	93.77	Both Polarities	GC-EI	https://massbank.eu/MassBank/Result.jsp?compound=2-nitropropane&op1=and&mz=&tol=0.3&op2=and&formula=&type=quick&searchType=keyword&sortKey=not&sortAction=1&pageNo=1&exec=&inst=GC-EI-BE&inst=GC-EI-Q&inst=GC-EI-QQ&inst=GC-EI-TOF&inst_grp=ESI&inst=CE-ESI-TOF&inst=ESI-ITFT&inst=ESI-ITTOF&inst=ESI-QIT&inst=ESI-QTOF&inst=ESI-TOF&inst=LC-ESI-IT&inst=LC-ESI-ITFT&inst=LC-ESI-ITTOF&inst=LC-ESI-Q&inst=LC-ES…
80-08-0	4,4'-sulfonylbis-benzenamine	C12H12N2O2S	Nc1ccc(cc1)S(=O)(=O)c1ccc(cc1)N	248.062	249.069	247.055	307.6	335.44	Both Polarities	GC-EI	https://massbank.eu/MassBank/Result.jsp?compound=dapsone&op1=and&mz=&tol=0.3&op2=and&formula=&type=quick&searchType=keyword&sortKey=not&sortAction=1&pageNo=1&exec=&inst=GC-EI-BE&inst=GC-EI-Q&inst=GC-EI-QQ&inst=GC-EI-TOF&inst_grp=ESI&inst=CE-ESI-TOF&inst=ESI-ITFT&inst=ESI-ITTOF&inst=ESI-QIT&inst=ESI-QTOF&inst=ESI-TOF&inst=LC-ESI-IT&inst=LC-ESI-ITFT&inst=LC-ESI-ITTOF&inst=LC-ESI-Q&inst=LC-ESI-QFT&i…
80-15-9	1-methyl-1-phenylethylhydroperoxide	C9H12O2	OOc1ccccc1C(C)C	152.084	153.091	151.076	432.46	459.28	Positive ESI	GC-EI	N/A	MassBank data not found
80-43-3	Bis(1-methyl-1-phenylethyl) peroxide	C18H22O2	CC(c1ccccc1OOc1ccccc1C(C)C)C	270.162	271.169	269.155	798.47	711.38	Positive ESI	GC-EI	N/A	MassBank data not found
80-51-3	4,4'-oxybis-, 1,1'-dihydrazide benzenesulfonic acid	C12H14N4O5S2	NNS(=O)(=O)c1ccc(cc1)Oc1ccc(cc1)S(=O)(=O)NN	358.041	359.048	357.033	219.75	271.55	Both Polarities	RPLC_+ESI	N/A	MassBank data not found
83016-70-0	2-[[2-[2-(dimethylamino)ethoxy]ethyl]methylamino]-ethanol	C9H22N2O2	OCCN(CCOCCN(C)C)C	190.168	191.175	189.161	88.38	106.24	Positive ESI	GC-EI	N/A	MassBank data not found
83-32-9	1,2-dihydro-acenaphthylene	C12H10	c1cc2cccc3c2c(c1)CC3	154.078	155.086	153.071	612.55	441.78	Positive ESI	GC-EI	N/A	MassBank data not found
85-42-7	Hexahydro-1,3-isobenzofurandione	C8H10O3	O=C1OC(=O)C2C1CCCC2	154.063	155.07	153.056	344.04	361.11	Positive ESI	GC-EI	N/A	MassBank data not found
87-61-6	1,2,3-trichlorobenzene	C6H3Cl3	Clc1c(Cl)cccc1Cl	179.93	180.937	178.923	643.41	651.87	Both Polarities	GC-EI	N/A	MassBank data not found
87-62-7	2,6-dimethyl-benzenamine	C8H11N	Cc1cccc(c1N)C	121.089	122.096	120.082	297.81	384.29	Positive ESI	GC-EI	https://massbank.eu/MassBank/Result.jsp?compound=2%2C6-Xylidine&op1=and&mz=&tol=0.3&op2=and&formula=&type=quick&searchType=keyword&sortKey=not&sortAction=1&pageNo=1&exec=&inst=GC-EI-BE&inst=GC-EI-Q&inst=GC-EI-QQ&inst=GC-EI-TOF&inst_grp=ESI&inst=CE-ESI-TOF&inst=ESI-ITFT&inst=ESI-ITTOF&inst=ESI-QIT&inst=ESI-QTOF&inst=ESI-TOF&inst=LC-ESI-IT&inst=LC-ESI-ITFT&inst=LC-ESI-ITTOF&inst=LC-ESI-Q&inst=LC-ES…
88-19-7	2-methyl-benzenesulfonamide	C7H9NO2S	Cc1ccccc1S(=O)(=O)N	171.035	172.043	170.028	253.71	240.13	Both Polarities	GC-EI	https://massbank.eu/MassBank/Result.jsp?compound=2-Toluenesulfonamide&op1=and&mz=&tol=0.3&op2=and&formula=&type=quick&searchType=keyword&sortKey=not&sortAction=1&pageNo=1&exec=&inst=GC-EI-BE&inst=GC-EI-Q&inst=GC-EI-QQ&inst=GC-EI-TOF&inst_grp=ESI&inst=CE-ESI-TOF&inst=ESI-ITFT&inst=ESI-ITTOF&inst=ESI-QIT&inst=ESI-QTOF&inst=ESI-TOF&inst=LC-ESI-IT&inst=LC-ESI-ITFT&inst=LC-ESI-ITTOF&inst=LC-ESI-Q&inst…
88-44-8	2-amino-5-methyl-benzenesulfonic acid	C7H9NO3S	Cc1ccc(c(c1)S(=O)(=O)O)N	187.03	188.038	186.023	154.91	123.89	Both Polarities	RPLC_+ESI	https://massbank.eu/MassBank/Result.jsp?compound=2-Amino-5-methylbenzenesulfonic+acid&op1=and&mz=&tol=0.3&op2=and&formula=&type=quick&searchType=keyword&sortKey=not&sortAction=1&pageNo=1&exec=&inst=GC-EI-BE&inst=GC-EI-Q&inst=GC-EI-QQ&inst=GC-EI-TOF&inst_grp=ESI&inst=CE-ESI-TOF&inst=ESI-ITFT&inst=ESI-ITTOF&inst=ESI-QIT&inst=ESI-QTOF&inst=ESI-TOF&inst=LC-ESI-IT&inst=LC-ESI-ITFT&inst=LC-ESI-ITTOF&in…
88-72-2	1-methyl-2-nitro-benzene	C7H7NO2	O=N(=O)c1ccccc1C	137.048	138.055	136.04	429.05	325.18	Negative ESI	GC-EI	N/A	MassBank data not found
88-85-7	2-(1-methylpropyl)-4,6-dinitrophenol	C10H12N2O5	CCC(c1cc(cc(c1O)N(=O)=O)N(=O)=O)C	240.075	241.082	239.067	610.16	438.68	Negative ESI	RPLC_-ESI	https://massbank.eu/MassBank/Result.jsp?compound=Dinoseb&op1=and&mz=&tol=0.3&op2=and&formula=&type=quick&searchType=keyword&sortKey=not&sortAction=1&pageNo=1&exec=&inst=GC-EI-BE&inst=GC-EI-Q&inst=GC-EI-QQ&inst=GC-EI-TOF&inst_grp=ESI&inst=CE-ESI-TOF&inst=ESI-ITFT&inst=ESI-ITTOF&inst=ESI-QIT&inst=ESI-QTOF&inst=ESI-TOF&inst=LC-ESI-IT&inst=LC-ESI-ITFT&inst=LC-ESI-ITTOF&inst=LC-ESI-Q&inst=LC-ESI-QFT&i…
91-20-3	Naphthalene	C10H8	c1ccc2c(c1)cccc2	128.063	129.07	127.055	457.34	379.79	Positive ESI	GC-EI	N/A	MassBank data not found
920-66-1	1,1,1,3,3,3-hexafluoro-2-Propanol	C3H2F6O	OC(C(F)(F)F)C(F)(F)F	168.001			496.51	239.816	Negative ESI	RPLC_-ESI	N/A	MassBank data not found
95-14-7	1H-Benzotriazole	C6H5N3	c1ccc2c(c1)[nH]nn2	119.048	120.056	118.041	231.85	193.87	Both Polarities	GC-EI	https://massbank.eu/MassBank/Result.jsp?compound=Benzotriazole&op1=and&mz=&tol=0.3&op2=and&formula=C6H5N3&type=quick&searchType=keyword&sortKey=not&sortAction=1&pageNo=1&exec=&inst=GC-EI-BE&inst=GC-EI-Q&inst=GC-EI-QQ&inst=GC-EI-TOF&inst_grp=ESI&inst=CE-ESI-TOF&inst=ESI-ITFT&inst=ESI-ITTOF&inst=ESI-QIT&inst=ESI-QTOF&inst=ESI-TOF&inst=LC-ESI-IT&inst=LC-ESI-ITFT&inst=LC-ESI-ITTOF&inst=LC-ESI-Q&inst=…
95-16-9	Benzothiazole	C7H5NS	c1ccc2c(c1)scn2	135.014	136.022	134.007	313.96	207.33	Positive ESI	GC-EI	https://massbank.eu/MassBank/Result.jsp?compound=1%2C3-Benzothiazole&op1=and&mz=135.01430+&tol=0.3&op2=and&formula=&type=quick&searchType=keyword&sortKey=not&sortAction=1&pageNo=1&exec=&inst=GC-EI-BE&inst=GC-EI-Q&inst=GC-EI-QQ&inst=GC-EI-TOF&inst_grp=ESI&inst=CE-ESI-TOF&inst=ESI-ITFT&inst=ESI-ITTOF&inst=ESI-QIT&inst=ESI-QTOF&inst=ESI-TOF&inst=LC-ESI-IT&inst=LC-ESI-ITFT&inst=LC-ESI-ITTOF&inst=LC-E…
95-50-1	1,2-dichlorobenzene	C6H4Cl2	Clc1ccccc1Cl	145.969	146.976	144.962	519.21	377.39	Both Polarities	GC-EI	N/A	MassBank data not found
96-18-4	1,2,3-trichloropropane	C3H5Cl3	ClCC(CCl)Cl	145.946	146.953	144.938	402.59	319.61	Positive ESI	GC-EI	N/A	MassBank data not found
97-39-2	N,N'-bis(2-methylphenyl)-guanidine	C15H17N3	N=C(Nc1ccccc1C)Nc1ccccc1C	239.142	240.15	238.135	393.51	336	Positive ESI	GC-EI	N/A	MassBank data not found
97-74-5	N,N,N',N'-tetramethyl-thiodicarbonic diamide ([(H2N)C(S)]2S)	C6H12N2S3	CN(C(=S)SC(=S)N(C)C)C	208.016	209.024	207.009	559.13	459.55	Positive ESI	RPLC_+ESI	N/A	MassBank data not found
98-82-8	(1-methylethyl)-benzene	C9H12	CC(c1ccccc1)C	120.094	121.101	119.087	535.32	503.59	Positive ESI	GC-EI	N/A	MassBank data not found
98-95-3	Nitrobenzene	C6H5NO2	O=N(=O)c1ccccc1	123.032	124.039	122.025	407.1	244.91	Negative ESI	GC-EI	N/A	MassBank data not found
99-99-0	1-methyl-4-nitro-benzene	C7H7NO2	Cc1ccc(cc1)N(=O)=O	137.048	138.055	136.04	455.34	377.02	Negative ESI	GC-EI	N/A	MassBank data not found

## Sheet: Table S7
Table S7: Comparison of modeled removal from a typical WWTP in this study to observed removal in the literature.
CAS	Name	Removal (%)	Removal (Literature, %)
95-14-7	1H-Benzotriazole	64.49	261-3, ~304, 56-745
115-96-8	2-Chloro-, 1,1',1''-phosphate ethanol	4.23	11,6, ~204
13674-84-5	1-Chloro-, 2,2',2''-phosphate 2-propanol	32.54	11,6, ~04
13674-87-8	1,3-Dichloro-, 2,2',2''-phosphate 2-propanol	13.87	11,6
78-51-3	2-butoxy-, 1,1',1''-phosphate ethanol	10.53	881,6
3380-34-5	5-chloro-2-(2,4-dichlorophenoxy)-phenol	30.23	901,7-8, ~709
95-16-9	Benzothiazole	8.89	801,3,10, ~804
131-57-7	(2-hydroxy-4-methoxyphenyl)phenyl-methanone	15.97	901,11-12, ~70-1009
126-86-3	2,4,7,9-tetramethyl-5-decyne-4,7-diol	19.13	501,13
103-90-2	N-(4-hydroxyphenyl)-acetamide	12.59	1001,3,14-15, ~92-1009, 73.4-99.316
1981-07-02	1,2-benzisothiazol-3(2H)-one 1,1-dioxide	15.08	991,17-18
60-00-4	N,N'-1,2-ethanediylbis[N-(carboxymethyl)-glycine	47.49	51,10,19-21, ~04
1912-24-9	6-chloro-N2-ethyl-N4-(1-methylethyl)-1,3,5-triazine-2,4-diamine	2.97	231,3,22, ~05
330-54-1	N'-(3,4-dichlorophenyl)-N,N-dimethyl-urea	31.34	331-3,22, ~05
83-32-9	1,2-dihydro-acenaphthylene	44.4	851,23
120-12-7	Anthracene	42.64	901,23
91-20-3	Naphthalene	64.34	601,23
108-78-1	1,3,5-Triazine-2,4,6-triamine	22.54	5324
References
1. J. Margot, L. Rossi, D. A. Barry and C. Holliger, A review of the fate of micropollutants in wastewater treatment plants, Wiley Interdiscip. Rev. Water, 2015, 2, 457–487.
2. R. L. Oulton, T. Kohn and D. M. Cwiertny, Pharmaceuticals and personal care products in effluent matrices: A survey of transformation and removal during wastewater treatment and implications for wastewater management, J. Environ. Monit., 2010, 12, 1956–1978.
3. A. A. Guedez and W. Püttmann, Occurrence and fate of TMDD in wastewater treatment plants in Germany, Water Res., 2011, 45, 5313–5322.
4. T. Reemtsma, S. Weiss, J. Mueller, M. Petrovic, S. González, D. Barcelo, F. Ventura and T. P. Knepper, Polar pollutants entry into the water cycle by municipal wastewater: A European perspective, Environ. Sci. Technol., 2006, 40, 5451–5458.
5. W. Qi, H. Singer, M. Berg, B. Müller, B. Pernet-Coudrier, H. Liu and J. Qu, Elimination of polar micropollutants and anthropogenic markers by wastewater treatment in Beijing, China, Chemosphere, 2015, 119, 1054–1061.
6. K. D. North, Tracking Polybrominated Diphenyl Ether Releases in a Wastewater Treatment Plant Effluent, Palo Alto, California, Environ. Sci. Technol., 2004, 38, 4484–4488.
7. M. Gardner, S. Comber, M. D. Scrimshaw, E. Cartmell, J. Lester and B. Ellor, The significance of hazardous chemicals in wastewater treatment works effluents, Sci. Total Environ., 2012, 437, 363–372.
8. M. Pelaez, M. G. Antoniou, X. He, D. D. Dionysiou, A. A. De Cruz, K. Tsimeli, T. Triantis, T. Kaloudis, C. Williams, M. Aubel, A. Foss, U. Khan, K. E. O. Shea and J. Westrick, 2010, vol. 16, pp. 213–226.
9. B. Kasprzyk-Hordern, R. M. Dinsdale and A. J. Guwy, The removal of pharmaceuticals, personal care products, endocrine disruptors and illicit drugs during wastewater treatment and its impact on the quality of receiving waters, Water Res., 2009, 43, 363–380.
10. M. G. Kokotou and N. S. Thomaidis, Determination of eight artificial sweeteners in wastewater by hydrophilic interaction liquid chromatography-tandem mass spectrometry, Anal. Methods, 2013, 5, 3825–3833.
11. L. Bijlsma, E. Emke, F. Hernández and P. De Voogt, Investigation of drugs of abuse and relevant metabolites in Dutch sewage water by liquid chromatography coupled to high resolution mass spectrometry, Chemosphere, 2012, 89, 1399–1406.
12. J. J. Yang and C. D. Metcalfe, Fate of synthetic musks in a domestic wastewater treatment plant and in an agricultural field amended with biosolids, Sci. Total Environ., 2006, 363, 149–165.
13. J. E. Loyo-Rosales, C. P. Rice and A. Torrents, Fate of octyl- and nonylphenol ethoxylates and some carboxylated derivatives in three American wastewater treatment plants, Environ. Sci. Technol., 2007, 41, 6815–6821.
14. M. Clara, G. Windhofer, P. Weilgony, O. Gans, M. Denner, A. Chovanec and M. Zessner, Identification of relevant micropollutants in Austrian municipal wastewater and their behaviour during wastewater treatment, Chemosphere, 2012, 87, 1265–1272.
15. R. Loos, R. Carvalho, D. C. António, S. Comero, G. Locoro, S. Tavazzi, B. Paracchini, M. Ghiani, T. Lettieri, L. Blaha, B. Jarosova, S. Voorspoels, K. Servaes, P. Haglund, J. Fick, R. H. Lindberg, D. Schwesig and B. M. Gawlik, EU-wide monitoring survey on emerging polar organic contaminants in wastewater treatment plant effluents, Water Res., 2013, 47, 6475–6487.
16. M. Papageorgiou, C. Kosma and D. Lambropoulou, Seasonal occurrence, removal, mass loading and environmental risk assessment of 55 pharmaceuticals and personal care products in a municipal wastewater treatment plant in Central Greece, Sci. Total Environ., 2016, 543, 547–569.
17. I. González-Mariño, J. B. Quintana, I. Rodríguez and R. Cela, Evaluation of the occurrence and biodegradation of parabens and halogenated by-products in wastewater by accurate-mass liquid chromatography-quadrupole-time-of-flight-mass spectrometry (LC-QTOF-MS), Water Res., 2011, 45, 6770–6780.
18. N. Lozano, C. P. Rice, M. Ramirez and A. Torrents, Fate of Triclocarban, Triclosan and Methyltriclosan during wastewater and biosolids treatment processes, Water Res., 2013, 47, 4519–4527.
19. G. G. Ying, B. Williams and R. Kookana, Environmental fate of alkylphenols and alkylphenol ethoxylates—a review, Environ. Int., 2002, 28, 215–226.
20. F. T. Lange, M. Scheurer and H. J. Brauch, Artificial sweeteners--a recently recognized class of emerging environmental contaminants: a review, Anal. Bioanal. Chem., 2012, 403, 2503–2518.
21. A. Bergé, M. Cladière, J. Gasperi, A. Coursimault, B. Tassin and R. Moilleron, Meta-analysis of environmental contamination by phthalates, Environ. Sci. Pollut. Res. Int., 2013, 20, 8057–8076.
22. J. Meyer and K. Bester, Organophosphate flame retardants and plasticisers in wastewater treatment plants, J. Environ. Monit., 2004, 6, 599–605.
23. M. Blanchard, M. J. Teil, D. Ollivon, L. Legenti and M. Chevreuil, Polycyclic aromatic hydrocarbons and polychlorobiphenyls in wastewaters and sewage sludges from the Paris area (France), Environ. Res., 2004, 95, 184–197.
24. H. Zhu and K. Kannan, Occurrence and distribution of melamine and its derivatives in surface water, drinking water, precipitation, wastewater, and swimming pool water, Environ. Pollut., 2020, 258, 113743.

## Sheet: Table S8
Table S8: Sensitivity analysis
	MolecularMass (g/mol)	Log Kow	Kow / Dow	Koc / Doc	Water Solubility (mg/L)	Vapor Pressure (Pa)	Kaw	log Kaw	Biodeg Half-Life Predicted (days)	Bideg rate	Volatilization (%)	Via primary sludge(%)	Stripping(%)	Biodegradation(%)	Volatilization(%)	Via surplus sludge(%)	Evaporation into Air (%)	Partition into Sludge (%)	Total elimination from waste water(%)	Total emission via effluent(%)
Median	165.016	1.8475	70.3894	52.4807	3294.02	3.03295	4.98171e-05	-4.30395	20	0.02	0.02	0.47	0.16	12.47	0.08	0.22	0.26	0.69	13.12	86.88
low KOW	165.016	1.67955	63.9904	52.4807	3294.02	3.03295	4.98171e-05	-4.30395	20	0.02	0.02	0.47	0.16	12.47	0.08	0.22	0.26	0.69	13.12	86.88
high KOW	165.016	2.03225	77.4283	52.4807	3294.02	3.03295	4.98171e-05	-4.30395	20	0.02	0.02	0.47	0.16	12.47	0.08	0.22	0.26	0.69	13.12	86.88
low KOC	165.016	1.8475	70.3894	47.7098	3294.02	3.03295	4.98171e-05	-4.30395	20	0.02	0.02	0.43	0.16	12.48	0.08	0.2	0.26	0.63	13.09	86.91
high KOC	165.016	1.8475	70.3894	57.7288	3294.02	3.03295	4.98171e-05	-4.30395	20	0.02	0.02	0.52	0.16	12.47	0.08	0.24	0.26	0.76	13.17	86.83
low water solubility	165.016	1.8475	70.3894	52.4807	2994.56	3.03295	4.98171e-05	-4.30395	20	0.02	0.03	0.47	0.17	12.47	0.09	0.22	0.29	0.69	13.14	86.86
high water solubility	165.016	1.8475	70.3894	52.4807	3623.42	3.03295	4.98171e-05	-4.30395	20	0.02	0.02	0.47	0.14	12.48	0.07	0.22	0.23	0.69	13.11	86.89
low vp	165.016	1.8475	70.3894	52.4807	3294.02	2.75723	4.98171e-05	-4.30395	20	0.02	0.02	0.47	0.14	12.48	0.07	0.22	0.23	0.69	13.11	86.89
high vp	165.016	1.8475	70.3894	52.4807	3294.02	3.33625	4.98171e-05	-4.30395	20	0.02	0.02	0.47	0.14	12.48	0.07	0.22	0.23	0.69	13.11	86.89
low kaw	165.016	1.8475	70.3894	52.4807	3294.02	3.03295	4.52882e-05	-3.91268	20	0.02	0.02	0.47	0.13	12.48	0.07	0.22	0.22	0.69	13.1	86.9
high kaw	165.016	1.8475	70.3894	52.4807	3294.02	3.03295	5.47988e-05	-4.73434	20	0.02	0.02	0.47	0.15	12.47	0.08	0.22	0.25	0.69	13.11	86.89
low biodeg	165.016	1.8475	70.3894	52.4807	3294.02	3.03295	4.98171e-05	-4.30395	18.1818	0.0181818	0.02	0.47	0.14	11.37	0.07	0.22	0.23	0.69	12	88
high biodeg	165.016	1.8475	70.3894	52.4807	3294.02	3.03295	4.98171e-05	-4.30395	22	0.022	0.02	0.47	0.14	13.55	0.07	0.21	0.23	0.68	14.18	85.82
Change
	Log Kow	Koc / Doc	Water Solubility (mg/L)	Vapor Pressure (Pa)	log Kaw	Biodeg Half-Life Predicted (days)	Bideg rate	Volatilization (%)	Via primary sludge(%)	Stripping(%)	Biodegradation(%)	Volatilization(%)	Via surplus sludge(%)	Evaporation into Air (%)	Partition into Sludge (%)	Total elimination from waste water(%)	Total emission via effluent(%)
low KOW	-0.167955	0	0	0	0	0	0	0	0	0	0	0	0	0	0	0	0
high KOW	0.18475	0	0	0	0	0	0	0	0	0	0	0	0	0	0	0	0
low KOC	0	-4.77098	0	0	0	0	0	0	-0.04	0	0.01	0	-0.02	0	-0.06	-0.03	0.03
high KOC	0	5.24807	0	0	0	0	0	0	0.05	0	0	0	0.02	0	0.07	0.05	-0.05
low water solubility	0	0	-299.456	0	0	0	0	0.01	0	0.01	0	0.01	0	0.03	0	0.02	-0.02
high water solubility	0	0	329.402	0	0	0	0	0	0	-0.02	0.01	-0.01	0	-0.03	0	-0.01	0.01
low vp	0	0	0	-0.275723	0	0	0	0	0	-0.02	0.01	-0.01	0	-0.03	0	-0.01	0.01
high vp	0	0	0	0.303295	0	0	0	0	0	-0.02	0.01	-0.01	0	-0.03	0	-0.01	0.01
low kaw	0	0	0	0	0.391268	0	0	0	0	-0.03	0.01	-0.01	0	-0.04	0	-0.02	0.02
high kaw	0	0	0	0	-0.430395	0	0	0	0	-0.01	0	0	0	-0.01	0	-0.01	0.01
low biodeg	0	0	0	0	0	-1.81818	-0.00181818	0	0	-0.02	-1.1	-0.01	0	-0.03	0	-1.12	1.12
high biodeg	0	0	0	0	0	2	0.002	0	0	-0.02	1.08	-0.01	-0.01	-0.03	-0.01	1.06	-1.06
Sensitiviy total emission via effluent (%)
	Log Kow	Koc / Doc	Water Solubility (mg/L)	Vapor Pressure (Pa)	log Kaw	Biodeg Half-Life Predicted (days)
low KOW	0
high KOW	0
low KOC		0.379834
high KOC		0.575506
low water solubility			0.253223
high water solubility			0.115101
low vp				0.126611
high vp				0.115101
low kaw					0.253223
high kaw					0.115101
low biodeg						14.1805
high biodeg						12.2007
